# Supplementary material for: Dinuclear tricarbonylrhenium(i) complexes: impact of regioisomerism on the photoluminescence properties
Source: Royal Society of Chemistry journal article supplement (doi:10.1039/d4dt01907e), 2024-01-01
Supplement: d4dt01907e1.pdf [file d4dt01907e1.pdf]

## Electronic Supplementary Information (ESI)

### Dinuclear tricarbonylrhenium(I) complexes: Impact of regioisomerism on the photoluminescence properties

Stephen Le Garrec, David Martins-Bessa, Mariusz Wolff, Béatrice Delavaux-Nicot, Sonia Mallet-Ladeira, Charles-Louis Serpentine, Eric Benoist, Florence Bedos-Belval, and Suzanne Fery-Forgues

#### Synthesis and characterization

|                                                                                                                             |    |
|-----------------------------------------------------------------------------------------------------------------------------|----|
| <b>Abbreviations</b>                                                                                                        | 3  |
| <b>Figure S1.</b> <sup>1</sup> H NMR spectrum of <b>2-octyl-5-(pyridin-2-yl)-1,3,4-oxadiazole (1)</b> in CDCl <sub>3</sub>  | 4  |
| <b>Figure S2.</b> <sup>13</sup> C NMR spectrum of <b>2-octyl-5-(pyridin-2-yl)-1,3,4-oxadiazole (1)</b> in CDCl <sub>3</sub> | 5  |
| <b>Figure S3.</b> HSQC and HMBC NMR spectra of <b>2-octyl-5-(pyridin-2-yl)-1,3,4-oxadiazole (1)</b> in CDCl <sub>3</sub>    | 6  |
| <b>Figure S4.</b> <sup>1</sup> H NMR spectrum of ligand <b>L-Phe</b> in acetone- <i>d</i> <sub>6</sub>                      | 7  |
| <b>Figure S5.</b> <sup>13</sup> C NMR spectrum of ligand <b>L-Phe</b> in acetone- <i>d</i> <sub>6</sub>                     | 8  |
| <b>Figure S6.</b> HSQC and HMBC NMR spectra of ligand <b>L-Phe</b> in acetone- <i>d</i> <sub>6</sub>                        | 9  |
| <b>Figure S7.</b> <sup>1</sup> H NMR spectrum of ligand <b>L-paraPhe</b> in acetone- <i>d</i> <sub>6</sub>                  | 10 |
| <b>Figure S8.</b> <sup>13</sup> C NMR spectrum of ligand <b>L-paraPhe</b> in acetone- <i>d</i> <sub>6</sub>                 | 11 |
| <b>Figure S9.</b> HSQC and HMBC NMR spectra of ligand <b>L-paraPhe</b> in acetone- <i>d</i> <sub>6</sub>                    | 12 |
| <b>Figure S10.</b> <sup>1</sup> H NMR spectrum of ligand <b>L-metaPhe</b> in acetone- <i>d</i> <sub>6</sub>                 | 13 |
| <b>Figure S11.</b> <sup>13</sup> C NMR spectrum of ligand <b>L-metaPhe</b> in acetone- <i>d</i> <sub>6</sub>                | 14 |
| <b>Figure S12.</b> HSQC and HMBC NMR spectra of ligand <b>L-metaPhe</b> in acetone- <i>d</i> <sub>6</sub>                   | 15 |
| <b>Figure S13.</b> <sup>1</sup> H NMR spectrum of complex <b>Mono-Re-Phe</b> in acetone- <i>d</i> <sub>6</sub>              | 16 |
| <b>Figure S14.</b> <sup>13</sup> C NMR spectrum of complex <b>Mono-Re-Phe</b> in acetone- <i>d</i> <sub>6</sub>             | 17 |
| <b>Figure S15.</b> HSQC and HMBC NMR spectra of complex <b>Mono-Re-Phe</b> in acetone- <i>d</i> <sub>6</sub>                | 18 |
| <b>Figure S16.</b> <sup>1</sup> H NMR spectrum of complex <b>Bi-Re-paraPhe</b> in acetone- <i>d</i> <sub>6</sub>            | 19 |
| <b>Figure S17.</b> <sup>13</sup> C NMR spectrum of complex <b>Bi-Re-paraPhe</b> in acetone- <i>d</i> <sub>6</sub>           | 20 |
| <b>Figure S18.</b> HSQC and HMBC NMR spectra of complex <b>Bi-Re-paraPhe</b> in acetone- <i>d</i> <sub>6</sub>              | 21 |
| <b>Figure S19.</b> <sup>1</sup> H NMR spectrum of complex <b>Bi-Re-metaPhe</b> in acetone- <i>d</i> <sub>6</sub>            | 22 |
| <b>Figure S20.</b> <sup>13</sup> C NMR spectrum of complex <b>Bi-Re-metaPhe</b> in acetone- <i>d</i> <sub>6</sub>           | 23 |
| <b>Figure S21.</b> HSQC and HMBC NMR spectra of complex <b>Bi-Re-metaPhe</b> in acetone- <i>d</i> <sub>6</sub>              | 24 |
| <b>Figure S22.</b> ATR FT-IR spectra of microcrystalline powders of complexes <b>Mono-Re-Phe</b> and <b>Bi-Re-metaPhe</b>   | 25 |
| <b>Figure S23.</b> ATR FT-IR spectra of the microcrystalline powder of complex <b>Bi-Re-metaPhe</b>                         | 26 |

#### Crystallographic data

|                                                                                                                                              |    |
|----------------------------------------------------------------------------------------------------------------------------------------------|----|
| <b>Table S1.</b> Selected bond lengths for <b>Mono-Re-Phe</b> , <b>Bi-Re-metaPhe</b> , <b>L-paraPhe</b> and <b>L-metaPhe</b>                 | 26 |
| <b>Table S2.</b> Selected angles for complexes <b>Mono-Re-Phe</b> , <b>Bi-Re-metaPhe</b> , and ligands <b>L-paraPhe</b> and <b>L-metaPhe</b> | 27 |
| <b>Comment S1.</b> Crystal lattice of <b>Re-Phe</b>                                                                                          | 28 |
| <b>Figure S24.</b> Centrosymmetric dimers of <b>Re-Phe</b> and intermolecular interactions                                                   | 28 |
| <b>Figure S25.</b> Dimers of <b>Re-Phe</b> connected <i>via</i> intermolecular interactions into looped chains                               | 28 |
| <b>Figure S26.</b> Dimers of <b>Re-Phe</b> linked by intermolecular stacking interactions into stair chain                                   | 29 |
| <b>Figure S27.</b> Neighboring molecules of <b>Re-Phe</b> connected <i>via</i> intermolecular interactions into a zig-zag chain              | 29 |
| <b>Figure S28.</b> Crystal cell of complex <b>Mono-Re-Phe</b>                                                                                | 30 |
| <b>Figure S29.</b> Centrosymmetric dimers of <b>Mono-Re-Phe</b> and intermolecular interactions                                              | 30 |
| <b>Figure S30.</b> Crystal cell of <b>Bi-Re-metaPhe</b> , dimers and molecular view perpendicular to the central phenyl ring                 | 31 |
| <b>Figure S31.</b> Intermolecular and intramolecular interactions in <b>Bi-Re-metaPhe</b>                                                    | 31 |
| <b>Table S3.</b> Octahedral distortion parameters of complexes <b>Re-Phe</b> , <b>Mono-Re-Phe</b> and <b>Bi-Re-meta-Phe</b>                  | 31 |

|                                                                                                                                                                                                                                          |    |
|------------------------------------------------------------------------------------------------------------------------------------------------------------------------------------------------------------------------------------------|----|
| <b>Table S4.</b> Experimental and DFT-optimized octahedral distortion parameters in the singlet ( $S_0$ , $S_1$ excited) and triplet ( $T_1$ , excited) states of complexes <b>Re-Phe</b> , <b>Mono-Re-Phe</b> and <b>Bi-Re-meta-Phe</b> | 32 |
| <b>Table S5.</b> Geometrical parameters for short contacts in <b>Re-Phe</b> , <b>Mono-Re-Phe</b> and <b>Bi-Re-metaPhe</b>                                                                                                                | 32 |
| <b>Table S6.</b> Geometrical parameters for C–H··· $\pi$ interactions in <b>Re-Phe</b> , <b>Mono-Re-Phe</b> and <b>Bi-Re-metaPhe</b>                                                                                                     | 33 |
| <b>Table S7.</b> Geometrical parameters for $\pi$ ··· $\pi$ interactions detected in structure of <b>Re-Phe</b>                                                                                                                          | 33 |
| <b>Comment S2.</b> Hirshfeld surfaces (HS) analysis of <b>Re-Phe</b> , <b>Mono-Re-Phe</b> and <b>Bi-Re-metaPhe</b>                                                                                                                       | 33 |
| <b>Figure S32.</b> 2D FP for overall interactions and individual interactions in crystal packing of <b>Re-Phe</b>                                                                                                                        | 34 |
| <b>Figure S33.</b> 2D FP for overall interactions and individual interactions in crystal packing of <b>Mono-Re-Phe</b>                                                                                                                   | 35 |
| <b>Figure S34.</b> 2D FP for overall interactions and individual interactions in crystal packing of <b>Bi-Re-metaPhe</b>                                                                                                                 | 36 |

## Calculations

|                                                                                                                                                                                                                                        |    |
|----------------------------------------------------------------------------------------------------------------------------------------------------------------------------------------------------------------------------------------|----|
| <b>Table S8.</b> Selected calculated bond lengths and angles in the ground ( $S_0$ ), first singlet excited ( $S_1$ ) and first triplet excited ( $T_1$ ) states for <b>Re-Phe</b> , together with the experimental data               | 37 |
| <b>Table S9.</b> Selected calculated bond lengths and angles in the ground ( $S_0$ ) first singlet excited ( $S_1$ ) and first triplet excited ( $T_1$ ) states for <b>Mono-Re-Phe</b> , together with the experimental data           | 38 |
| <b>Table S10.</b> Selected calculated bond lengths and angles in the ground ( $S_0$ ) first singlet excited ( $S_1$ ) and first triplet excited ( $T_1$ ) states for <b>Bi-Re-metaPhe</b> , together with the experimental data        | 39 |
| <b>Table S11.</b> Selected calculated bond lengths and angles in the ground ( $S_0$ ) first singlet excited ( $S_1$ ) and first triplet excited ( $T_1$ ) states for <b>Bi-Re-paraPhe</b>                                              | 40 |
| <b>Table S12.</b> Calculated torsion angle value between pyta and R for the ground ( $S_0$ ), first singlet excited ( $S_1$ ) and first triplet excited state ( $T_1$ ) of the four complexes, and obtained from crystallographic data | 41 |
| <b>Table S13.</b> The frontier molecular orbital compositions (%) and energy levels for <b>Re-Phe</b> (in DCM)                                                                                                                         | 41 |
| <b>Table S14.</b> The frontier molecular orbital compositions (%) and energy levels for <b>Mono-Re-Phe</b> (in DCM)                                                                                                                    | 41 |
| <b>Table S15.</b> The frontier molecular orbital compositions (%) and energy levels for <b>Bi-Re-metaPhe</b> (in DCM)                                                                                                                  | 42 |
| <b>Table S16.</b> The frontier molecular orbital compositions (%) and energy levels for <b>Bi-Re-paraPhe</b> (in DCM)                                                                                                                  | 42 |
| <b>Table S17.</b> The main electronic transitions for <b>Re-Phe</b> (in DCM)                                                                                                                                                           | 43 |
| <b>Table S18.</b> The main electronic transitions for <b>Mono-Re-Phe</b> (in DCM)                                                                                                                                                      | 43 |
| <b>Table S19.</b> The main electronic transitions for <b>Bi-Re-metaPhe</b> (in DCM)                                                                                                                                                    | 44 |
| <b>Table S20.</b> The main electronic transitions for <b>Bi-Re-paraPhe</b> (in DCM)                                                                                                                                                    | 44 |
| <b>Table S21.</b> Excitation energies and oscillator strengths of the four complexes (in DCM)                                                                                                                                          | 45 |
| <b>Table S22.</b> Phosphorescence emission energies of the four complexes                                                                                                                                                              | 45 |
| <b>Table S23.</b> Natural population analysis of the orbitals of the central atom in the four complexes                                                                                                                                | 46 |
| <b>Table S24.</b> Atomic charges from the Natural Population Analysis (NPA) for the four complexes                                                                                                                                     | 46 |
| <b>Table S25.</b> Absolute electronegativity, absolute hardness, dipole moment, electrophilicity index and global softness of the four complexes                                                                                       | 47 |
| <b>Figure S35.</b> The isodensity plots of the frontier molecular orbitals of <b>Re-Phe</b> (in DCM)                                                                                                                                   | 48 |
| <b>Figure S36.</b> The isodensity plots of the frontier molecular orbitals of <b>Mono-Re-Phe</b> (in DCM)                                                                                                                              | 49 |
| <b>Figure S37.</b> The isodensity plots of the frontier molecular orbitals of <b>Bi-Re-metaPhe</b> (in DCM)                                                                                                                            | 50 |
| <b>Figure S38.</b> The isodensity plots of the frontier molecular orbitals of <b>Bi-Re-paraPhe</b> (in DCM)                                                                                                                            | 53 |
| <b>Figure S39.</b> Spin density distribution for the lowest triplet state $T_1$ of the four complexes                                                                                                                                  | 56 |
| <b>Figure S40.</b> Molecular Electrostatic Potential (MEP) of the four complexes                                                                                                                                                       | 57 |
| <b>Figure S41.</b> The experimental and simulated FT-IR and UV-Vis absorption spectra of <b>Re-Phe</b> (in DCM)                                                                                                                        | 58 |

## Electrochemistry

|                                                                                                                                                                                                   |    |
|---------------------------------------------------------------------------------------------------------------------------------------------------------------------------------------------------|----|
| <b>Table S26.</b> Experimental electrochemical data used, and calculated values of the energy gaps ( $E_g$ ) for complexes <b>Mono-Re-Phe</b> , <b>Bi-Re-paraPhe</b> , and <b>Bi-Re-metaPhe</b> . | 59 |
| <b>Comment S3.</b> Evaluation of the electrochemical energy gap values ( $E_g^{\text{el}}$ ) for the Re complexes                                                                                 | 59 |
| <b>Figure S42.</b> OSWVs: anodic and cathodic scans of complex <b>Mono-Re-Phe</b>                                                                                                                 | 60 |
| <b>Figure S43.</b> Cyclic voltammograms of complex <b>Mono-Re-Phe</b> , and of its first oxidation and reduction processes                                                                        | 60 |
| <b>Figure S44.</b> Cyclic voltammograms of the first oxidation process of complex <b>Mono-Re-Phe</b> at 1, 10, and 50 V/s, and of its first reduction process at 1, 10, and 50 V/s                | 60 |
| <b>Figure S45.</b> OSWVs: anodic and cathodic scans of complex <b>Bi-Re-paraPhe</b>                                                                                                               | 61 |
| <b>Figure S46.</b> Cyclic voltammograms of complex <b>Bi-Re-paraPhe</b> , and of its first oxidation and reduction processes                                                                      | 61 |

|                                                                                                                                                                                               |    |
|-----------------------------------------------------------------------------------------------------------------------------------------------------------------------------------------------|----|
| <b>Figure S47.</b> Cyclic voltammograms of the first oxidation process of complex <b>Bi-Re-paraPhe</b> at 1, 5, 10, and 50 V/s, and of its first reduction process at 1, 2, 5, 10, and 50 V/s | 61 |
| <b>Figure S48.</b> OSWVs: anodic scans of complex <b>Bi-Re-paraPhe</b> at different frequencies (20/50/100/200/500/1000) with amplitude 20 mV and step potential 5 mV                         | 61 |
| <b>Figure S49.</b> OSWVs: anodic and cathodic scans of complex <b>Bi-Re-metaPhe</b>                                                                                                           | 62 |
| <b>Figure S50.</b> Cyclic voltammograms of complex <b>Bi-Re-metaPhe</b> , its first oxidation and reduction processes at 5, 10, 50 V/s, and its first reduction potential 0.1, 0.5, 1 V/s     | 62 |
| <b>Figure S51.</b> OSWVs: anodic and cathodic scans of complex <b>Bi-Re-paraPhe</b> vs. <b>Bi-Re-metaPhe</b>                                                                                  | 62 |
| <b>Figure S52.</b> OSWVs: anodic scans of ligands <b>L-Phe</b> , <b>L-paraPhe</b> and <b>L-metaPhe</b> and of the corresponding electrochemical medium without the ligand                     | 63 |
| <b>Figure S53.</b> Cyclic voltammograms of ligands <b>L-Phe</b> , <b>L-paraPhe</b> and <b>L-metaPhe</b> and of the corresponding electrochemical medium without the ligand                    | 63 |

### Spectroscopy

|                                                                                                                             |    |
|-----------------------------------------------------------------------------------------------------------------------------|----|
| <b>Figure S54.</b> Emission decays of <b>Mono-Re-Phe</b> , <b>Bi-Re-paraPhe</b> , and <b>Bi-Re-metaPhe</b> in DCM solutions | 64 |
| <b>Figure S55.</b> Emission decays of <b>Mono-Re-Phe</b> and <b>Bi-Re-paraPhe</b> as powders                                | 65 |
| <b>Figure S56.</b> Emission decays of <b>Bi-Re-metaPhe</b> as pristine and ground powders                                   | 66 |
| <b>Figure S57.</b> Powder XRD patterns of the pristine, ground and THF-fumed powders of bimetallic complexes                | 66 |

### Calculations - Annex

|                                                                                   |    |
|-----------------------------------------------------------------------------------|----|
| <b>Table S27.</b> Cartesian coordinates of <b>Re-Phe</b> in $S_0$ (in DCM)        | 67 |
| <b>Table S28.</b> Cartesian coordinates of <b>Re-Phe</b> in $S_1$ (in DCM)        | 67 |
| <b>Table S29.</b> Cartesian coordinates of <b>Re-Phe</b> in $T_1$ (in DCM)        | 68 |
| <b>Table S30.</b> Cartesian coordinates of <b>Mono-Re-Phe</b> in $S_0$ (in DCM)   | 68 |
| <b>Table S31.</b> Cartesian coordinates of <b>Mono-Re-Phe</b> in $S_1$ (in DCM)   | 69 |
| <b>Table S32.</b> Cartesian coordinates of <b>Mono-Re-Phe</b> in $T_1$ (in DCM)   | 69 |
| <b>Table S33.</b> Cartesian coordinates of <b>Bi-Re-metaPhe</b> in $S_0$ (in DCM) | 70 |
| <b>Table S34.</b> Cartesian coordinates of <b>Bi-Re-metaPhe</b> in $S_1$ (in DCM) | 71 |
| <b>Table S35.</b> Cartesian coordinates of <b>Bi-Re-metaPhe</b> in $T_1$ (in DCM) | 72 |
| <b>Table S36.</b> Cartesian coordinates of <b>Bi-Re-paraPhe</b> in $S_0$ (in DCM) | 73 |
| <b>Table S37.</b> Cartesian coordinates of <b>Bi-Re-paraPhe</b> in $S_1$ (in DCM) | 74 |
| <b>Table S38.</b> Cartesian coordinates of <b>Bi-Re-paraPhe</b> in $T_1$ (in DCM) | 75 |

## Synthesis and characterization

### Abbreviations

DIPEA: *N,N*-Diisopropylethylamine

HATU: *O*-(7-aza-1*H*-benzotriazol-1-yl)-*N,N,N',N'*-tetramethyluronium hexafluorophosphate

*p*-TsCl: *p*-Toluenesulfonyl chloride

*p*-TsOH: *p*-Toluenesulfonic acid

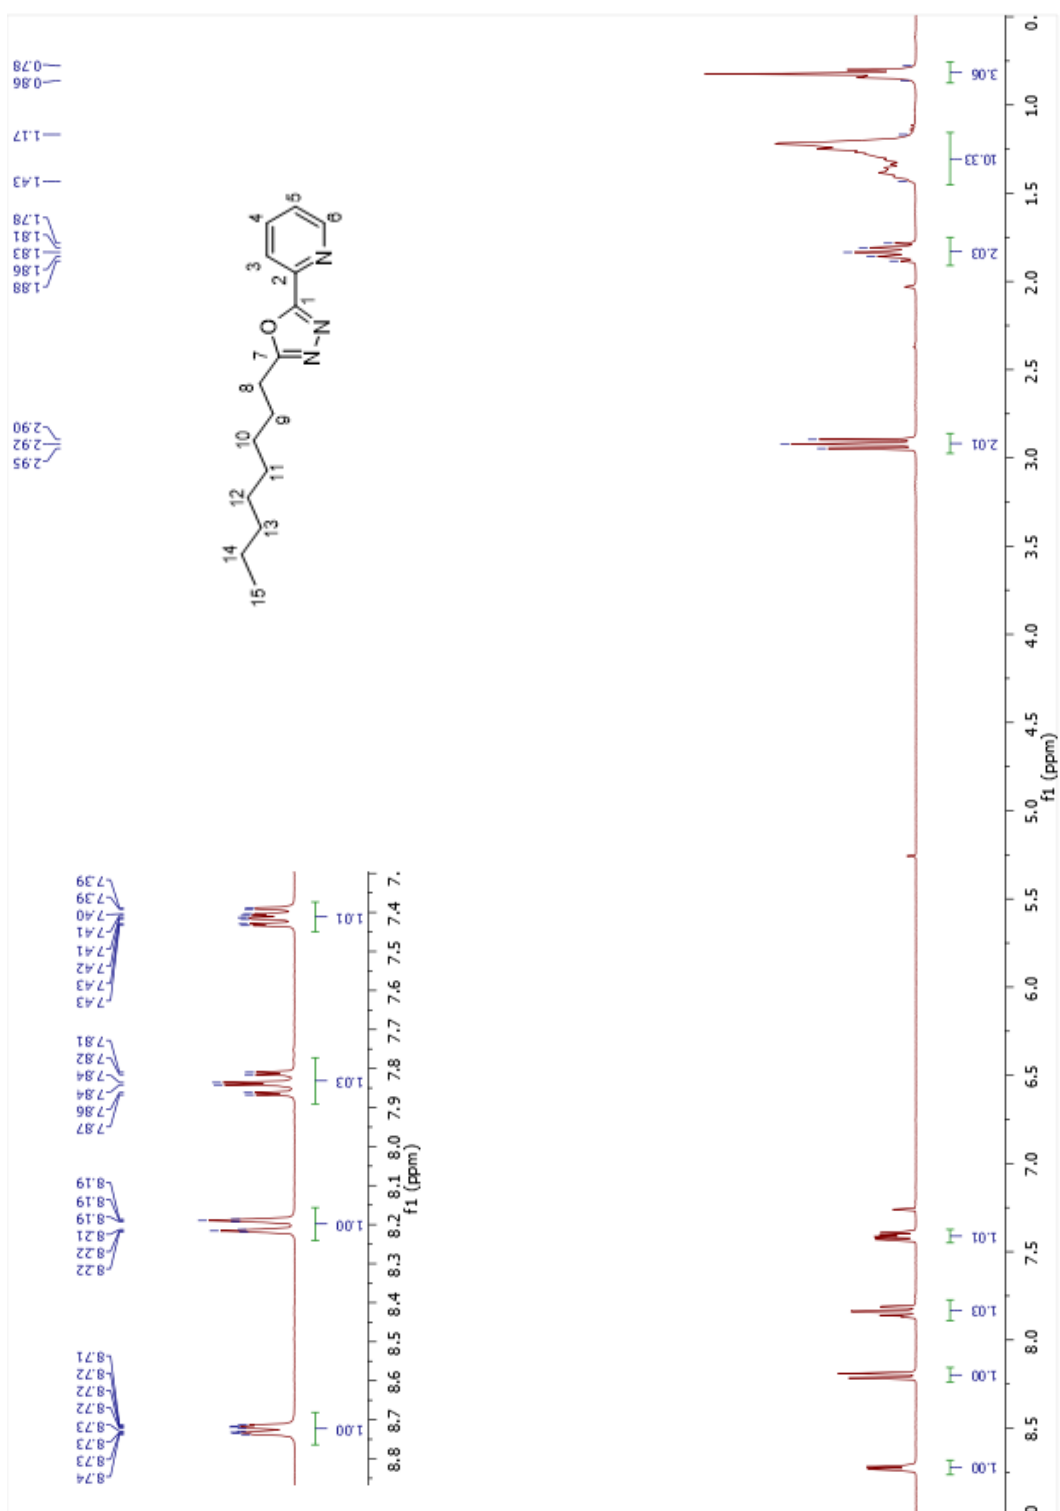

**Figure S1.** <sup>1</sup>H NMR spectrum of 2-octyl-5-(pyridin-2-yl)-1,3,4-oxadiazole (1) in CDCl<sub>3</sub> at 25°C (300 MHz).

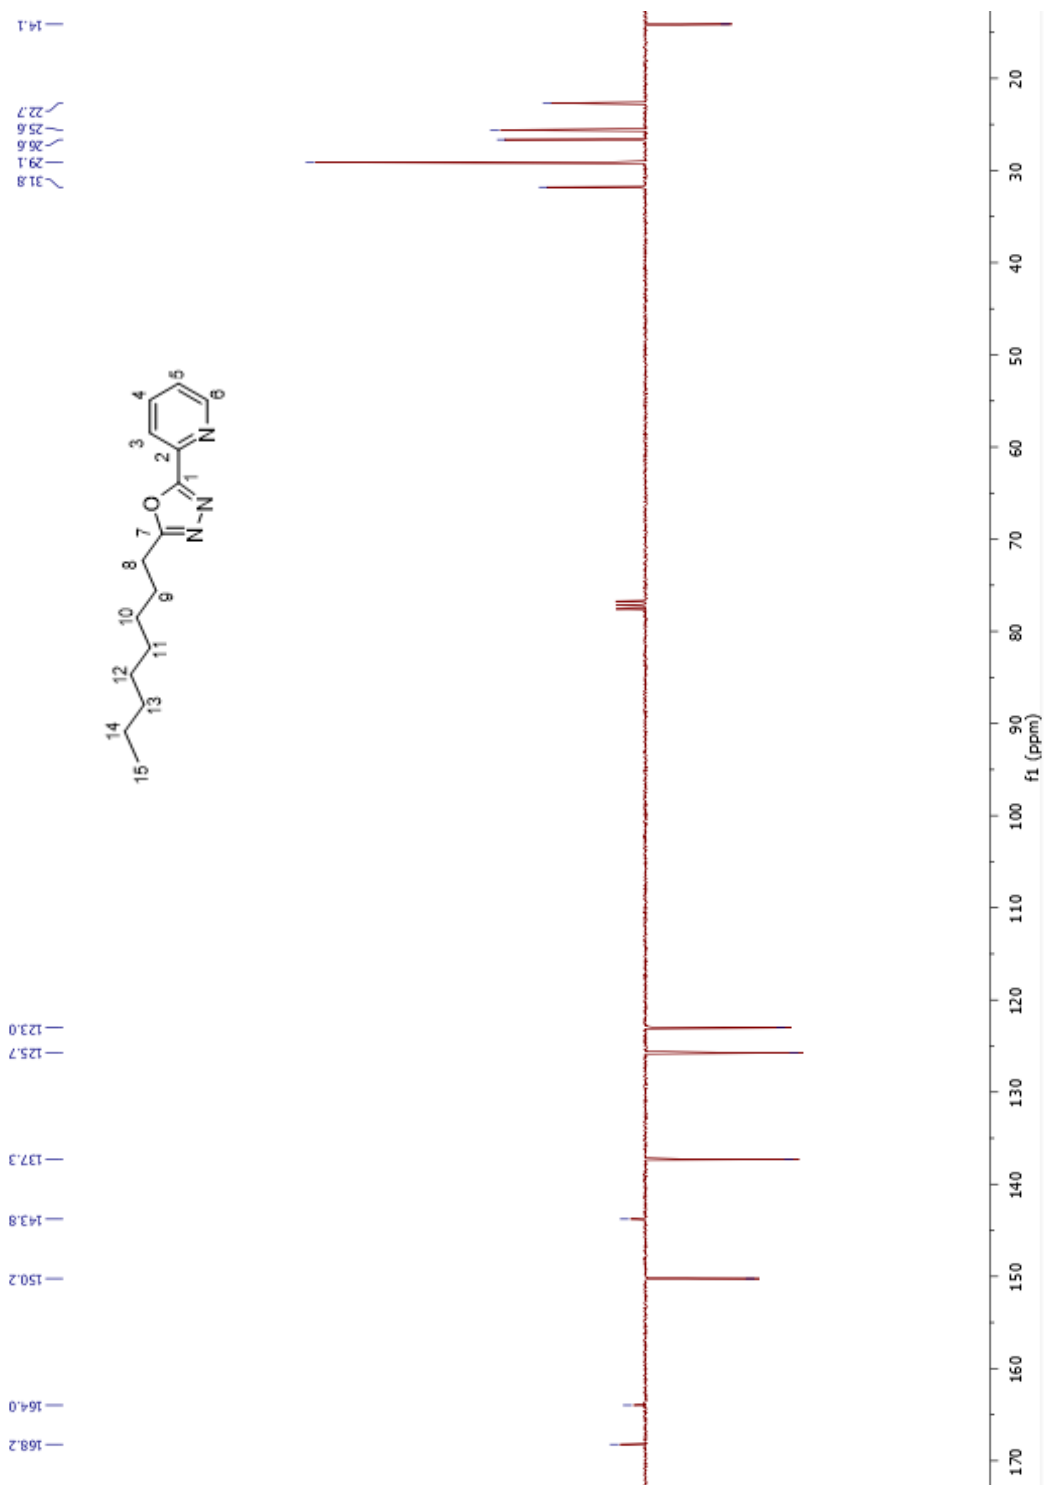

**Figure S2.** <sup>13</sup>C NMR spectrum of 2-octyl-5-(pyridin-2-yl)-1,3,4-oxadiazole (1) in CDCl<sub>3</sub> at 25°C (300 MHz).

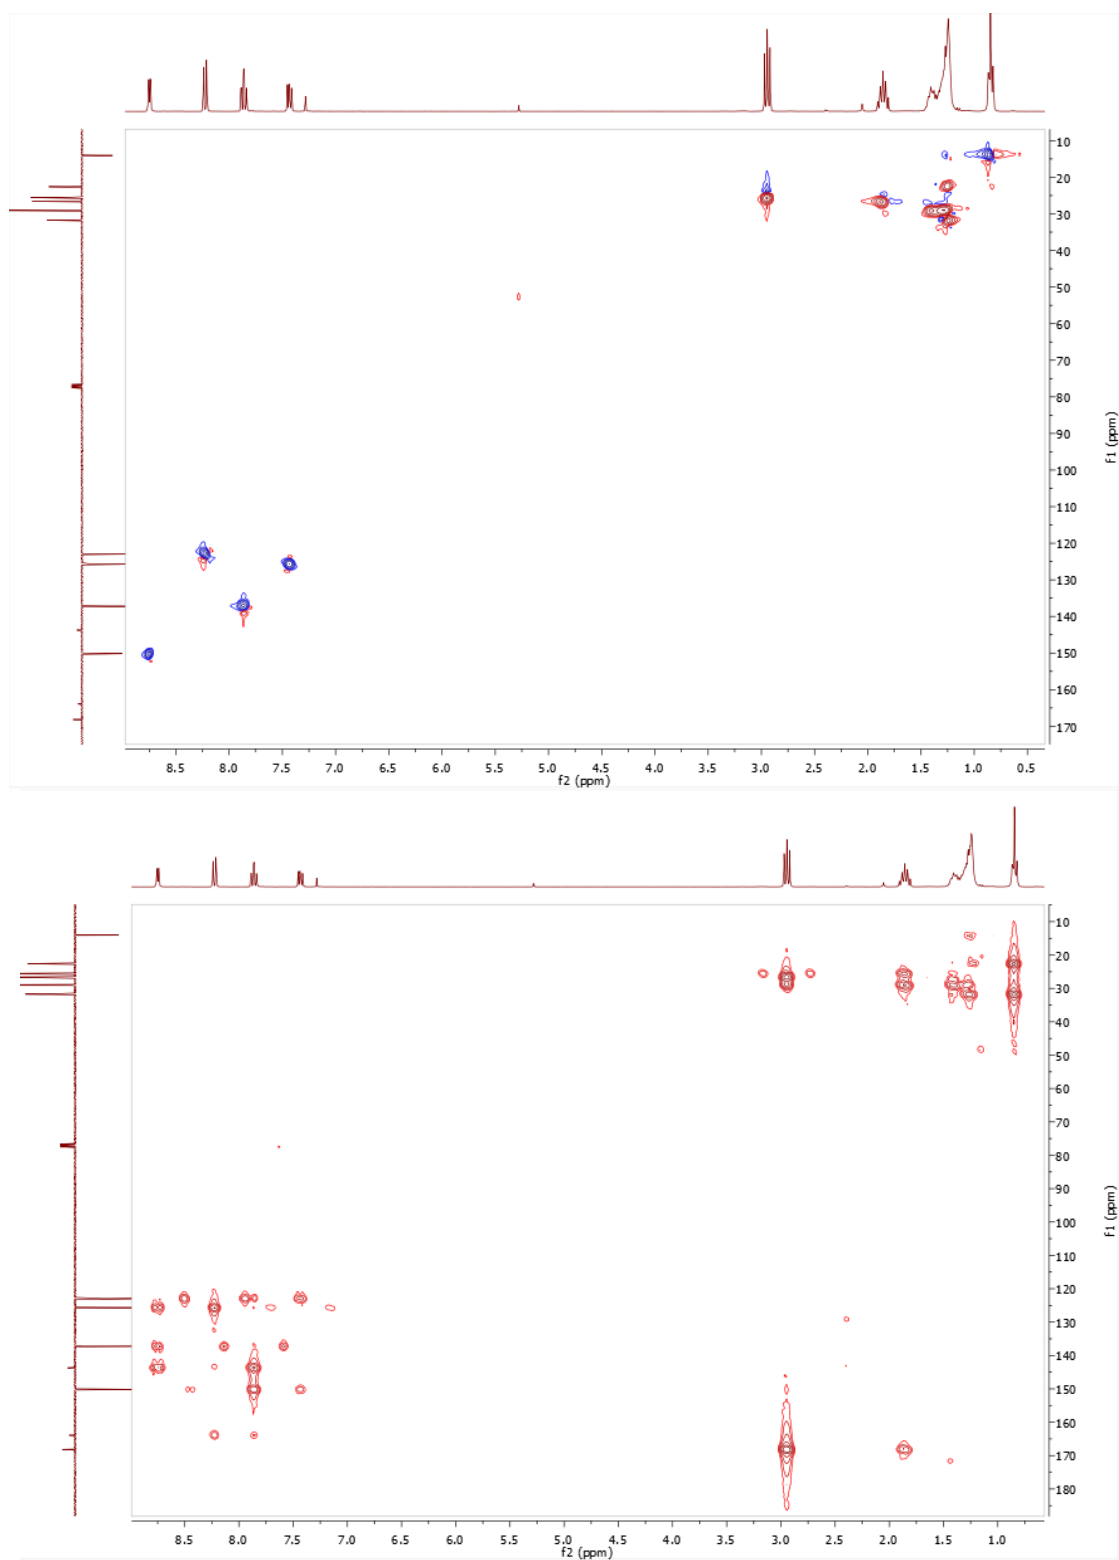

**Figure S3.** HSQC (top) and HMBC (bottom) NMR spectra of 2-octyl-5-(pyridin-2-yl) 1,3,4-oxadiazole (**1**) in CDCl<sub>3</sub> at 25°C (300 MHz).

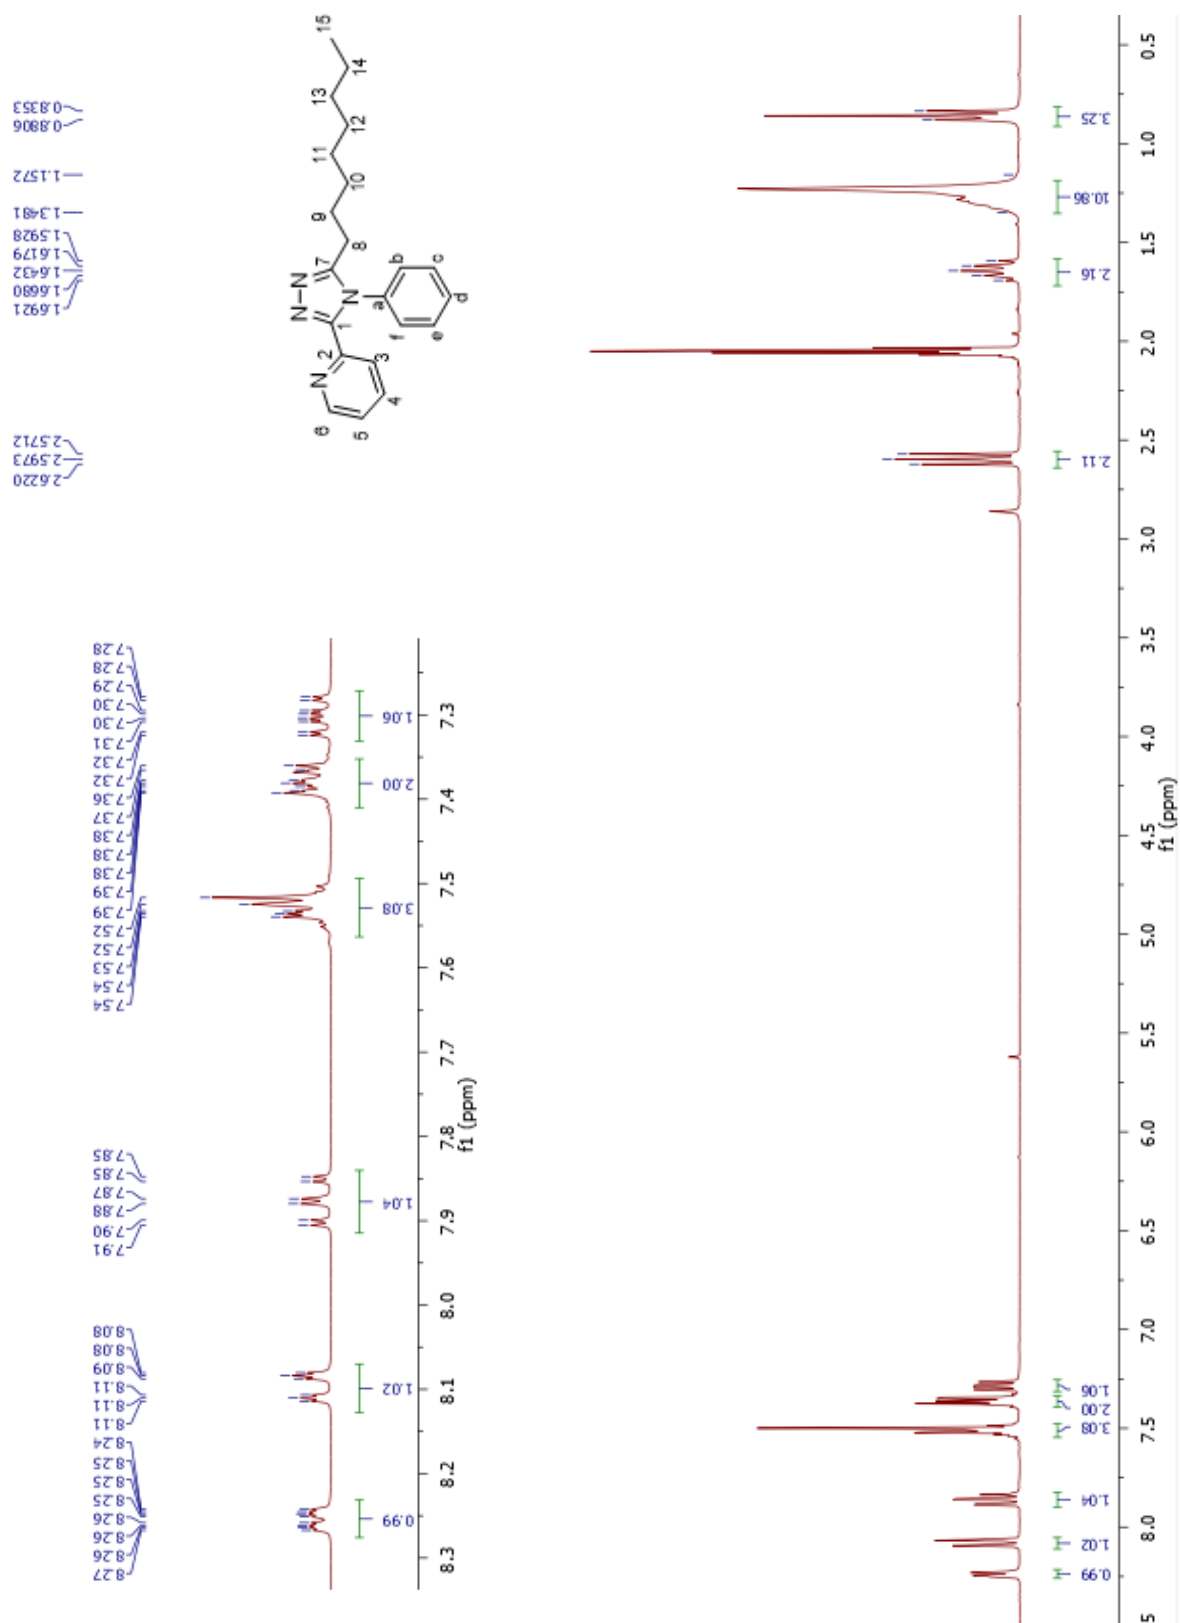

**Figure S4.** <sup>1</sup>H NMR spectrum of ligand L-Phe in acetone-d<sub>6</sub> at 25°C (300 MHz).

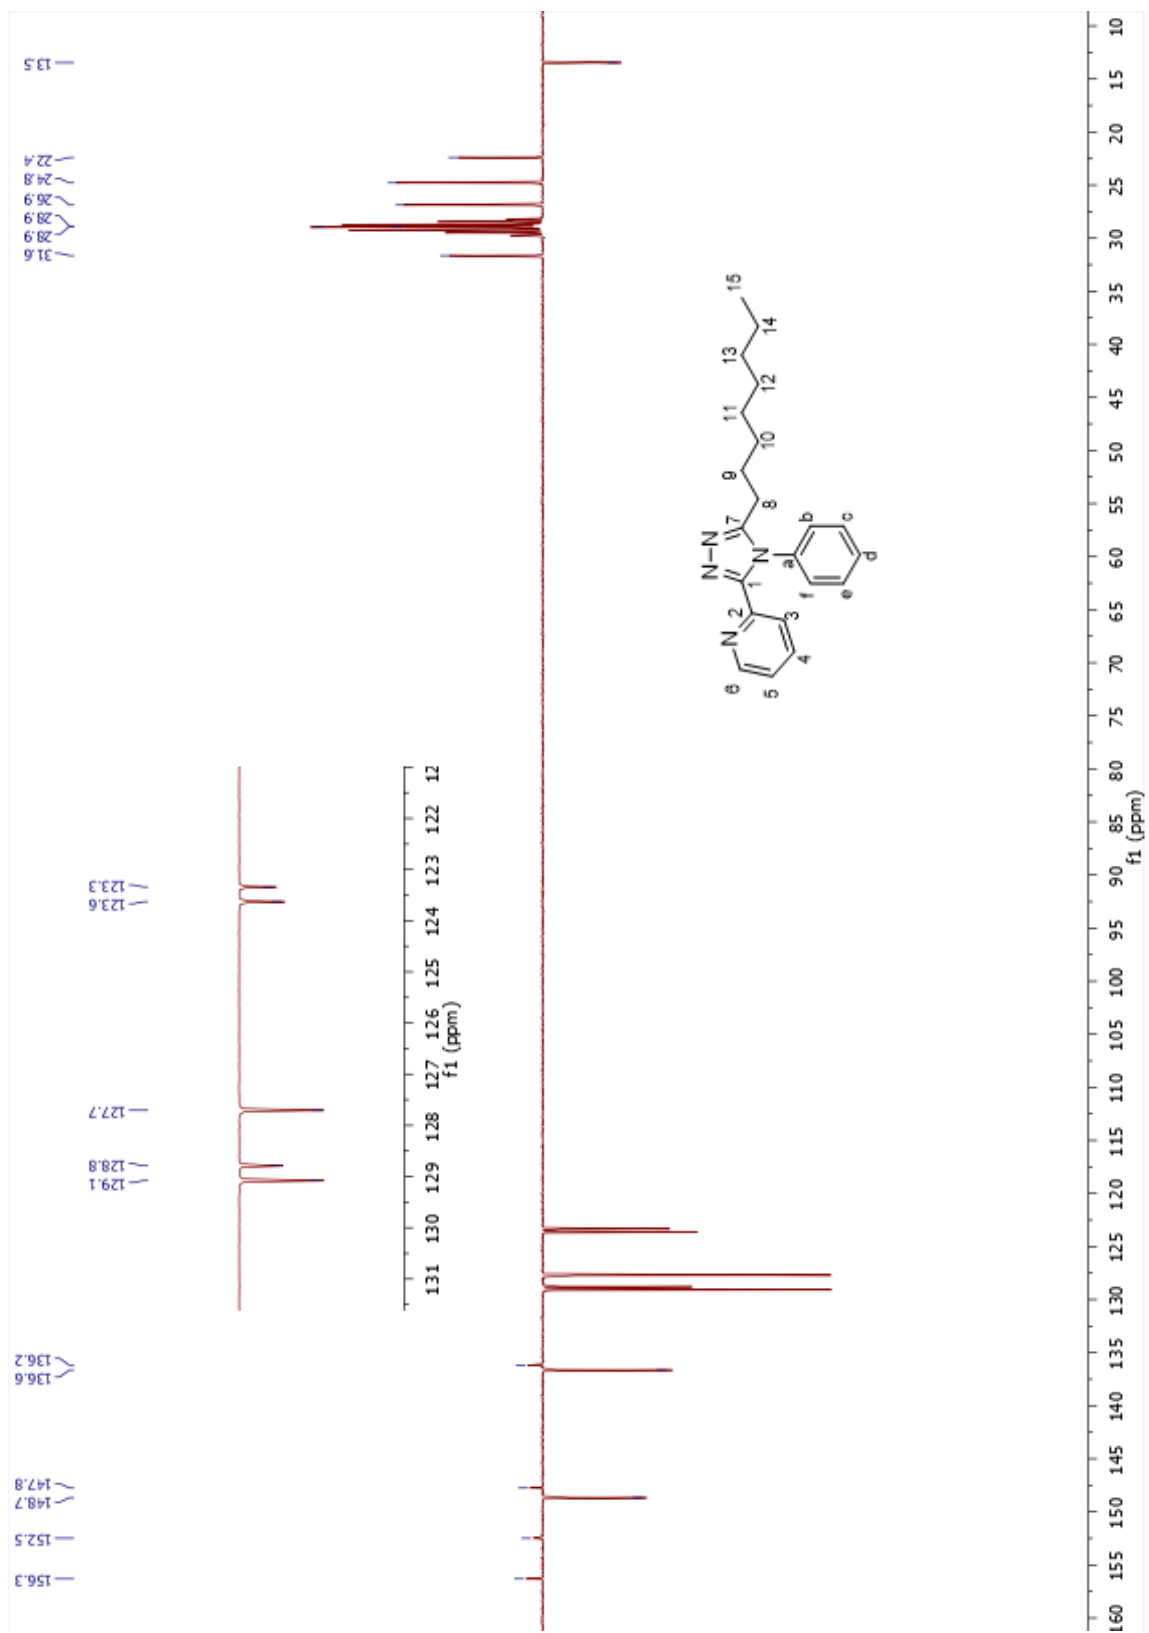

**Figure S5.**  $^{13}\text{C}$  NMR spectrum of ligand L-Phe in acetone- $d_6$  at 25°C (300 MHz).



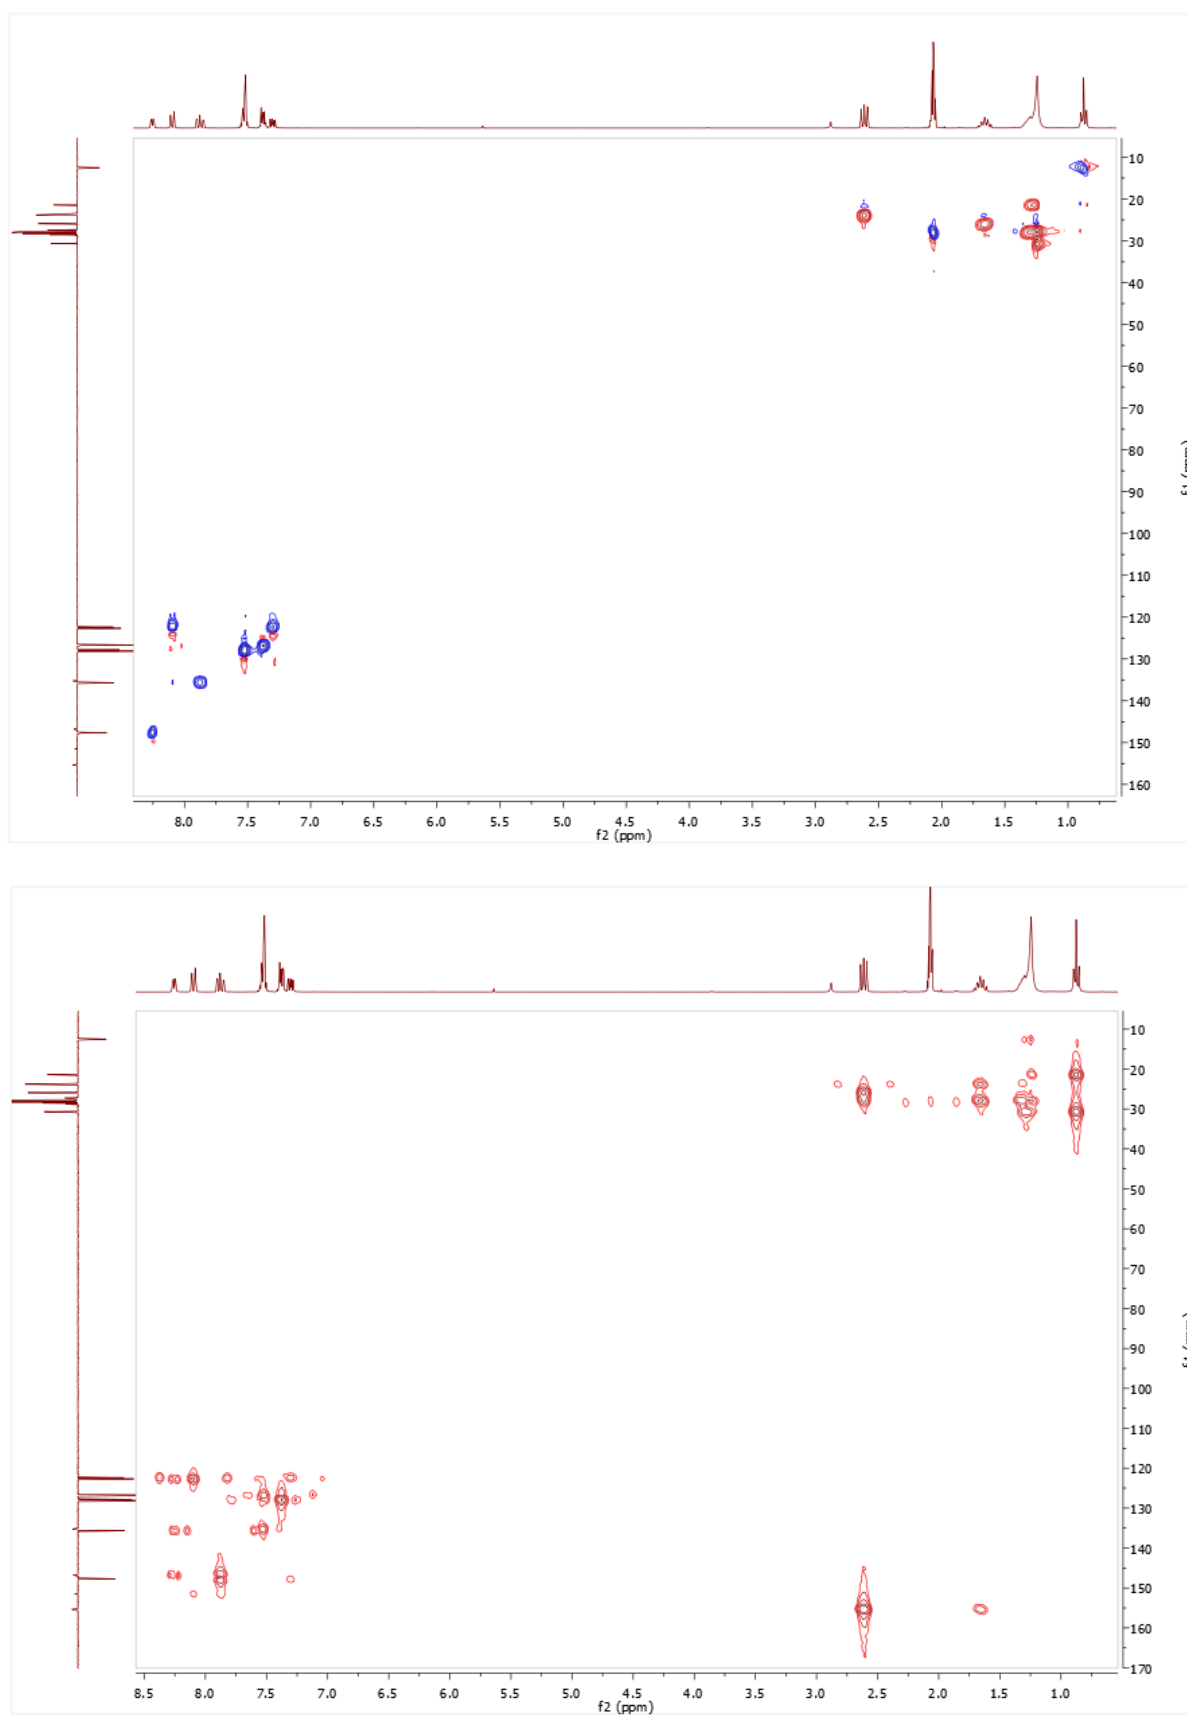

**Figure S6.** HSQC (top) and HMBC (bottom) NMR spectra of ligand **L-Phe** in acetone- $d_6$  at 25°C.



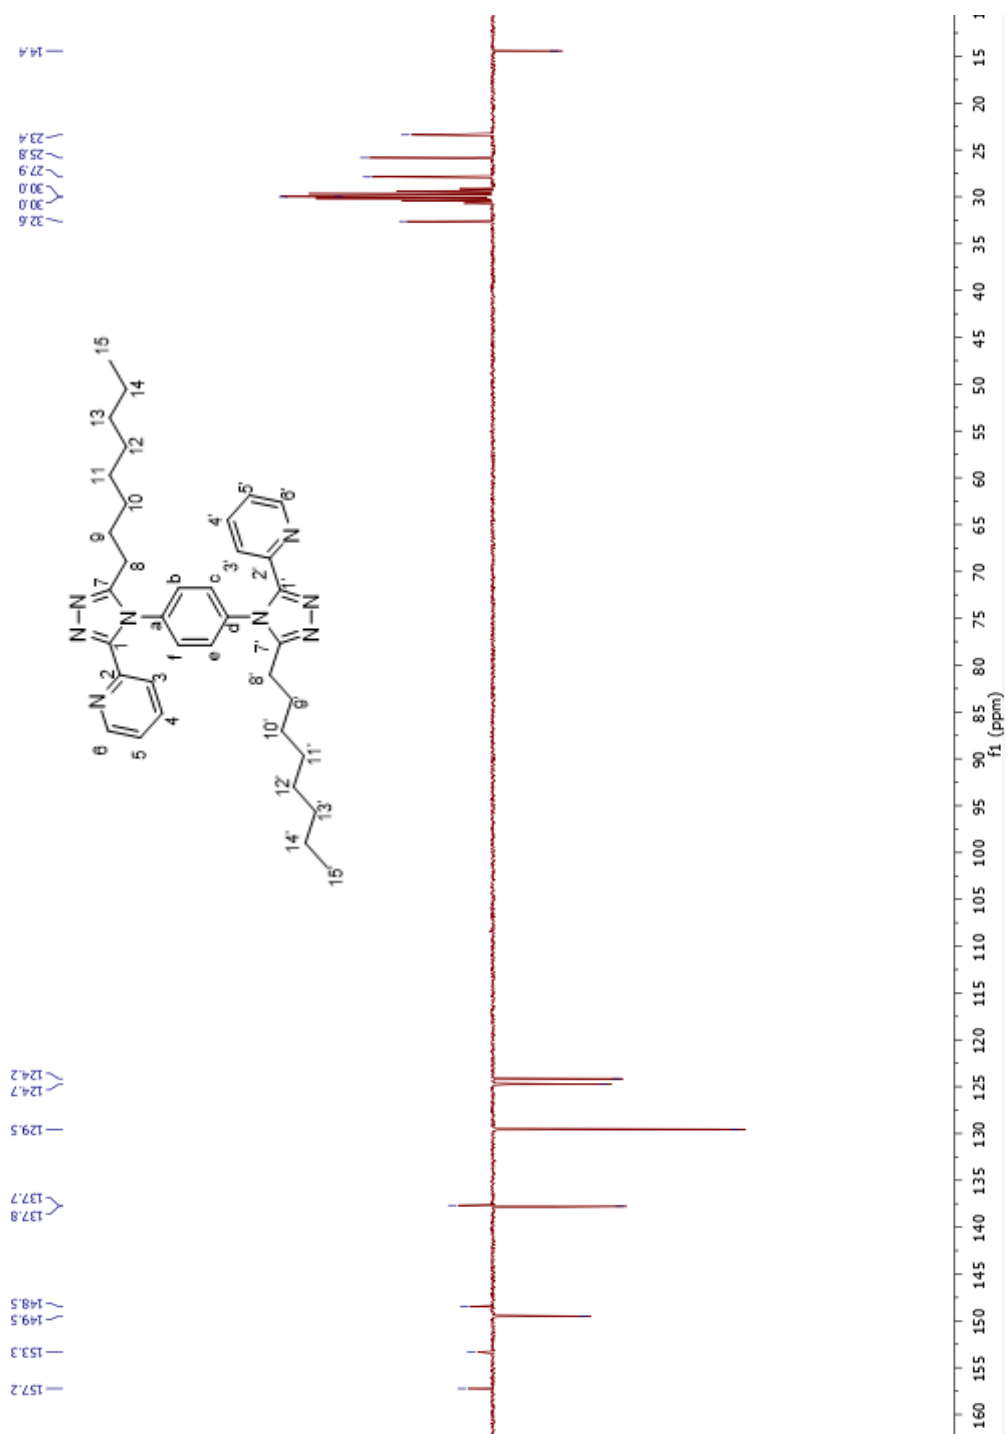

**Figure S8.**  $^{13}\text{C}$  NMR spectrum of ligand **L-paraPhe** in  $\text{acetone-}d_6$  at  $25^\circ\text{C}$  (300 MHz).

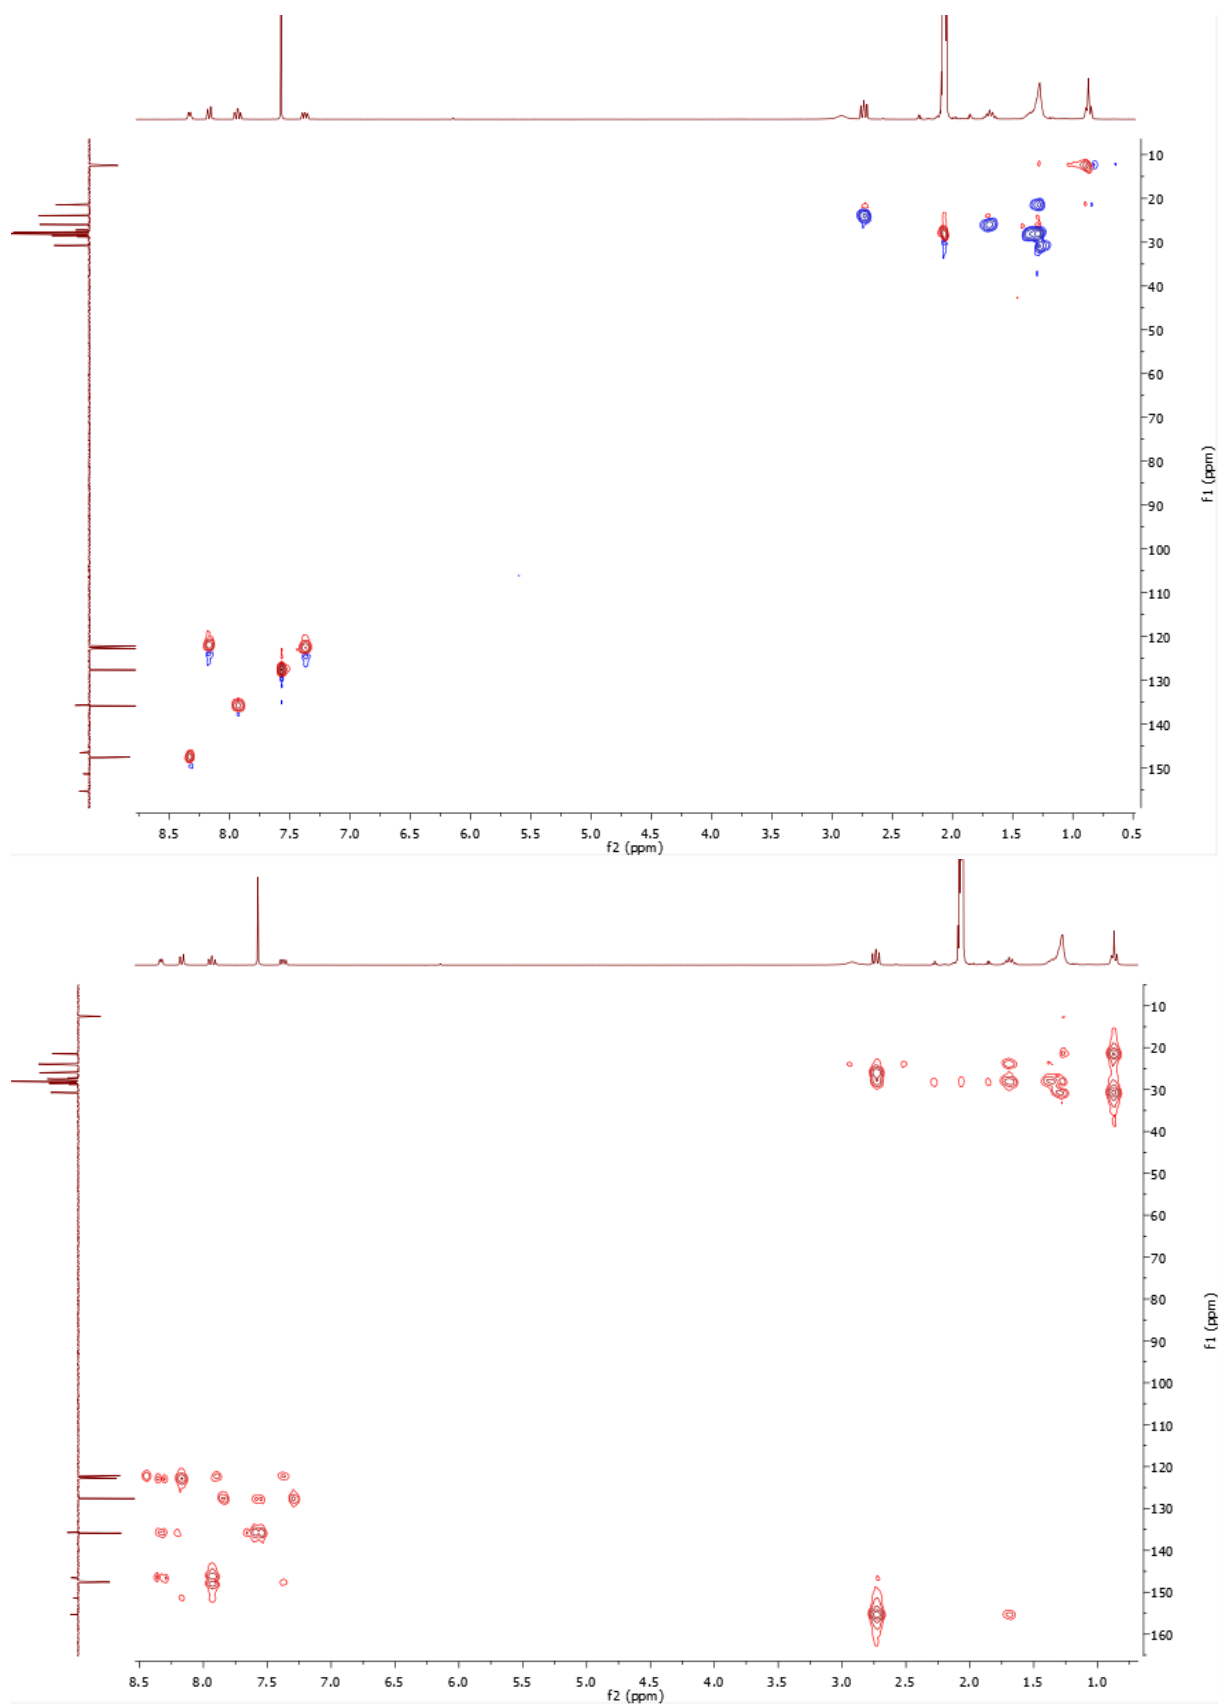

**Figure S9.** HSQC (top) and HMBC (bottom) NMR spectra of ligand *L-paraPhe* in acetone-*d*<sub>6</sub> at 25°C (300MHz).

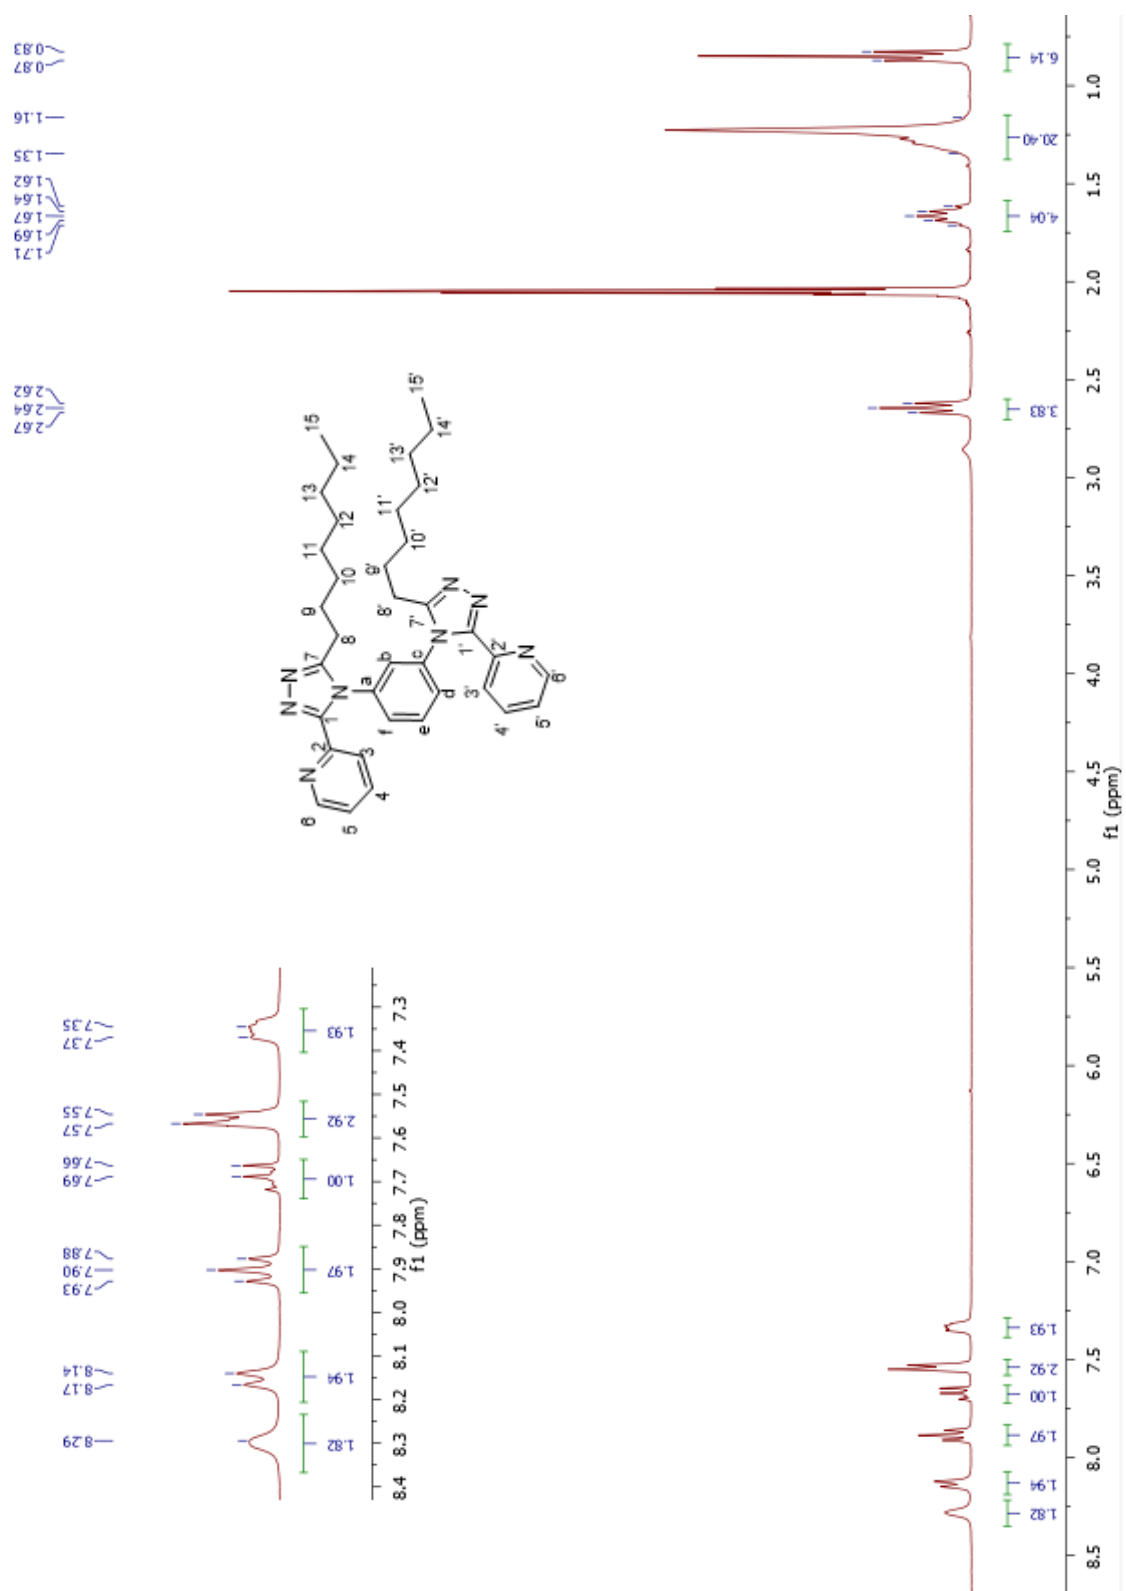

**Figure S10.**  $^1\text{H}$  NMR spectrum of ligand **L-metaPhe** in  $\text{acetone-}d_6$  at  $25^\circ\text{C}$  (300 MHz).

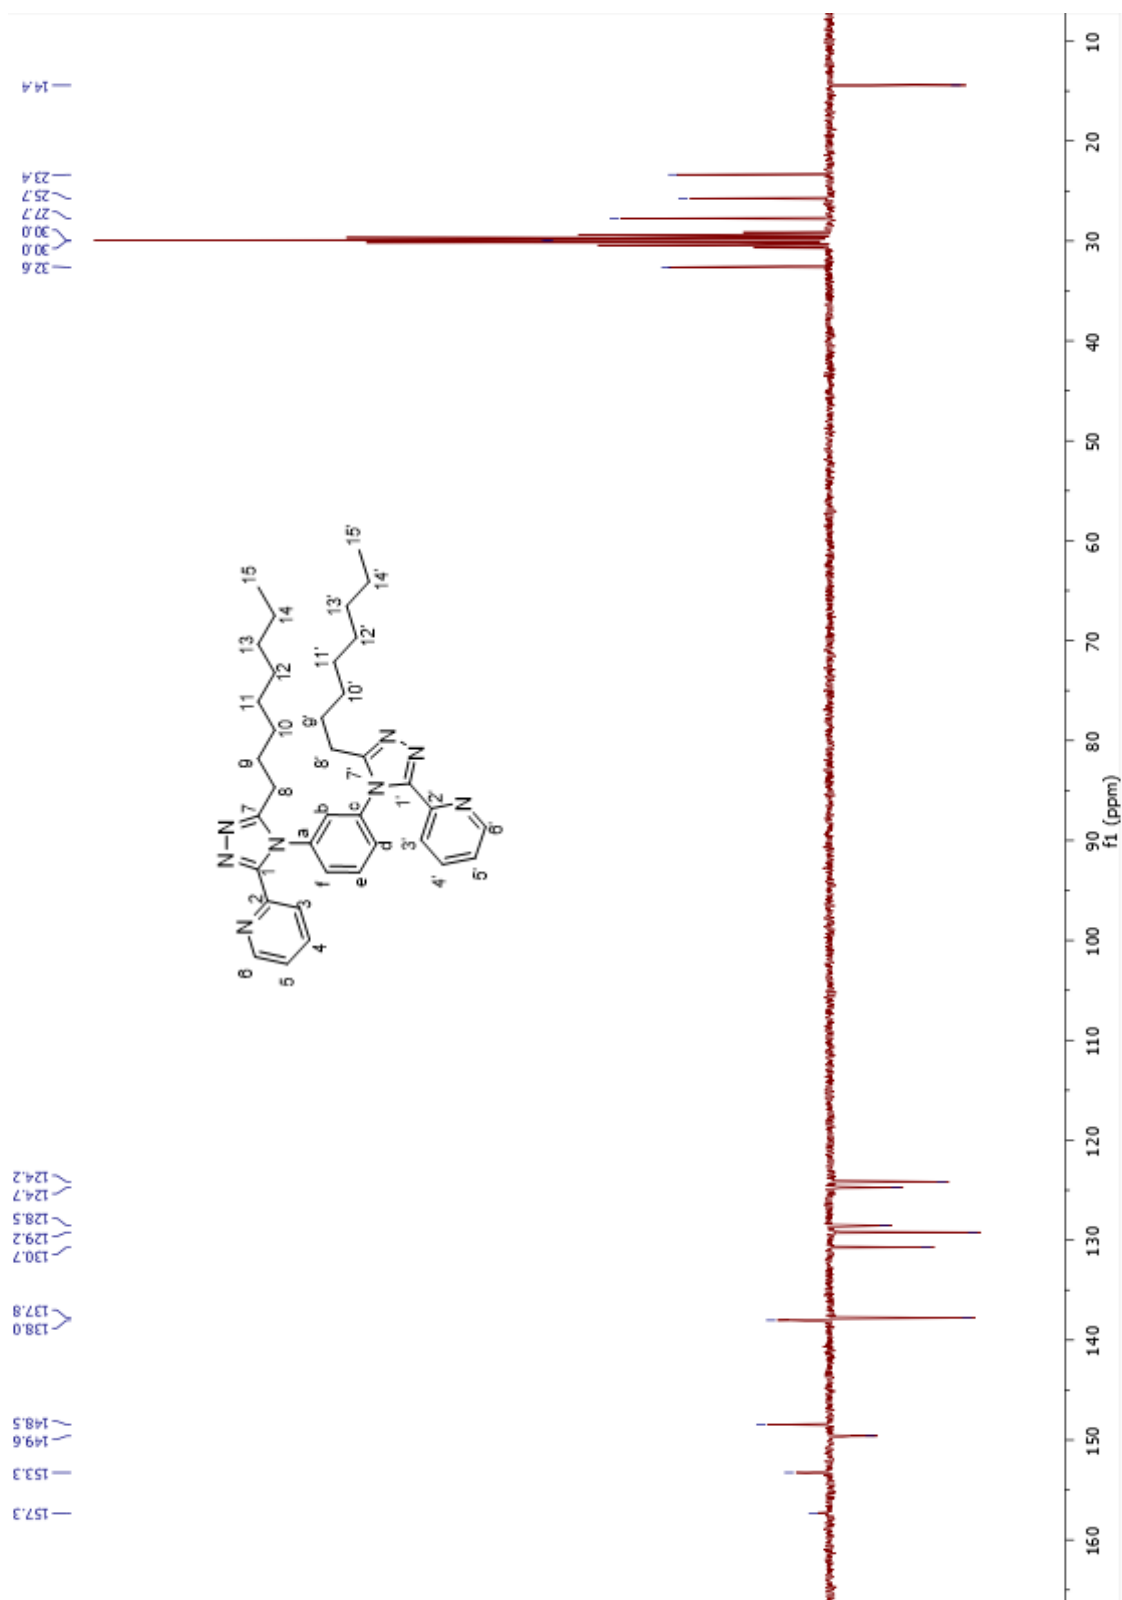

**Figure S11.**  $^{13}\text{C}$  NMR spectrum of ligand *L*-metaPhe in acetone- $d_6$  at 25°C (300 MHz).

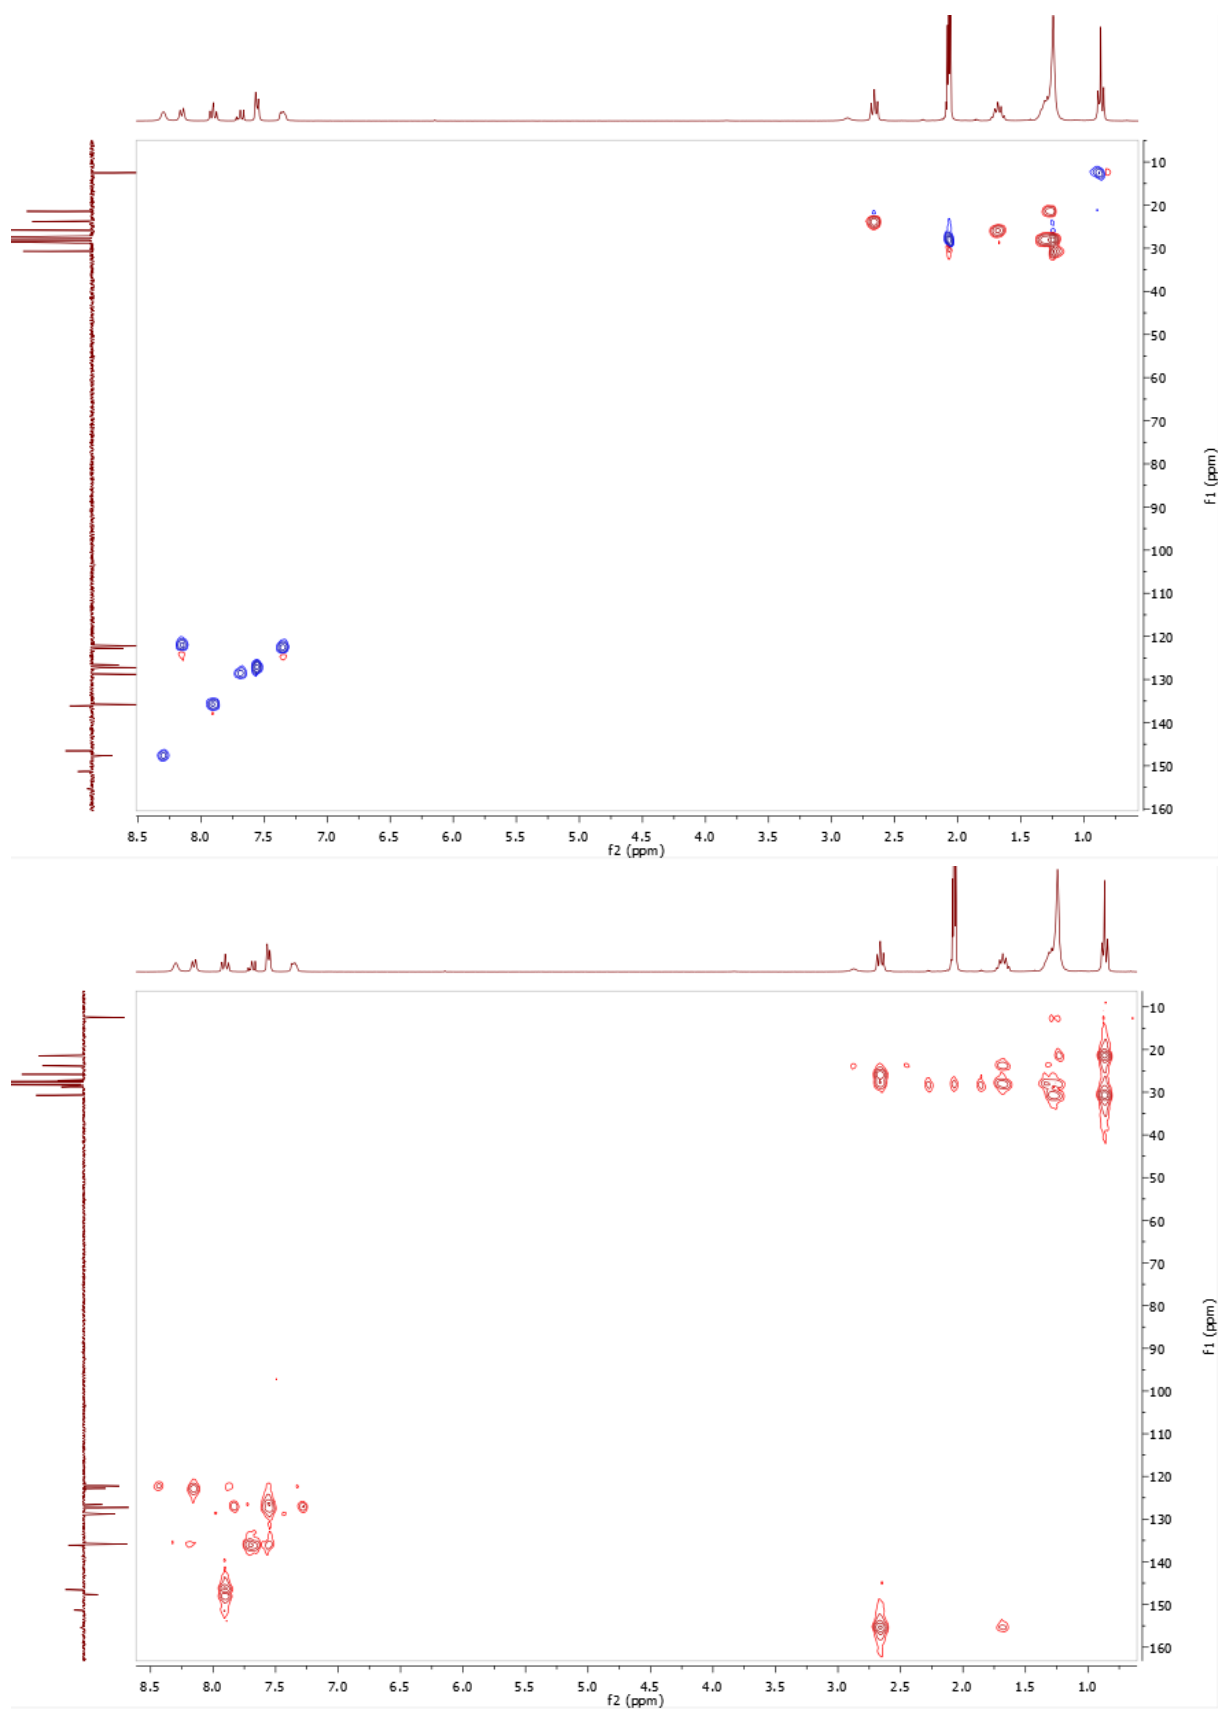

**Figure S12.** HSQC (top) and HMBC (bottom) NMR spectra of ligand *L*-metaPhe in acetone-*d*<sub>6</sub> at 25°C (300MHz).





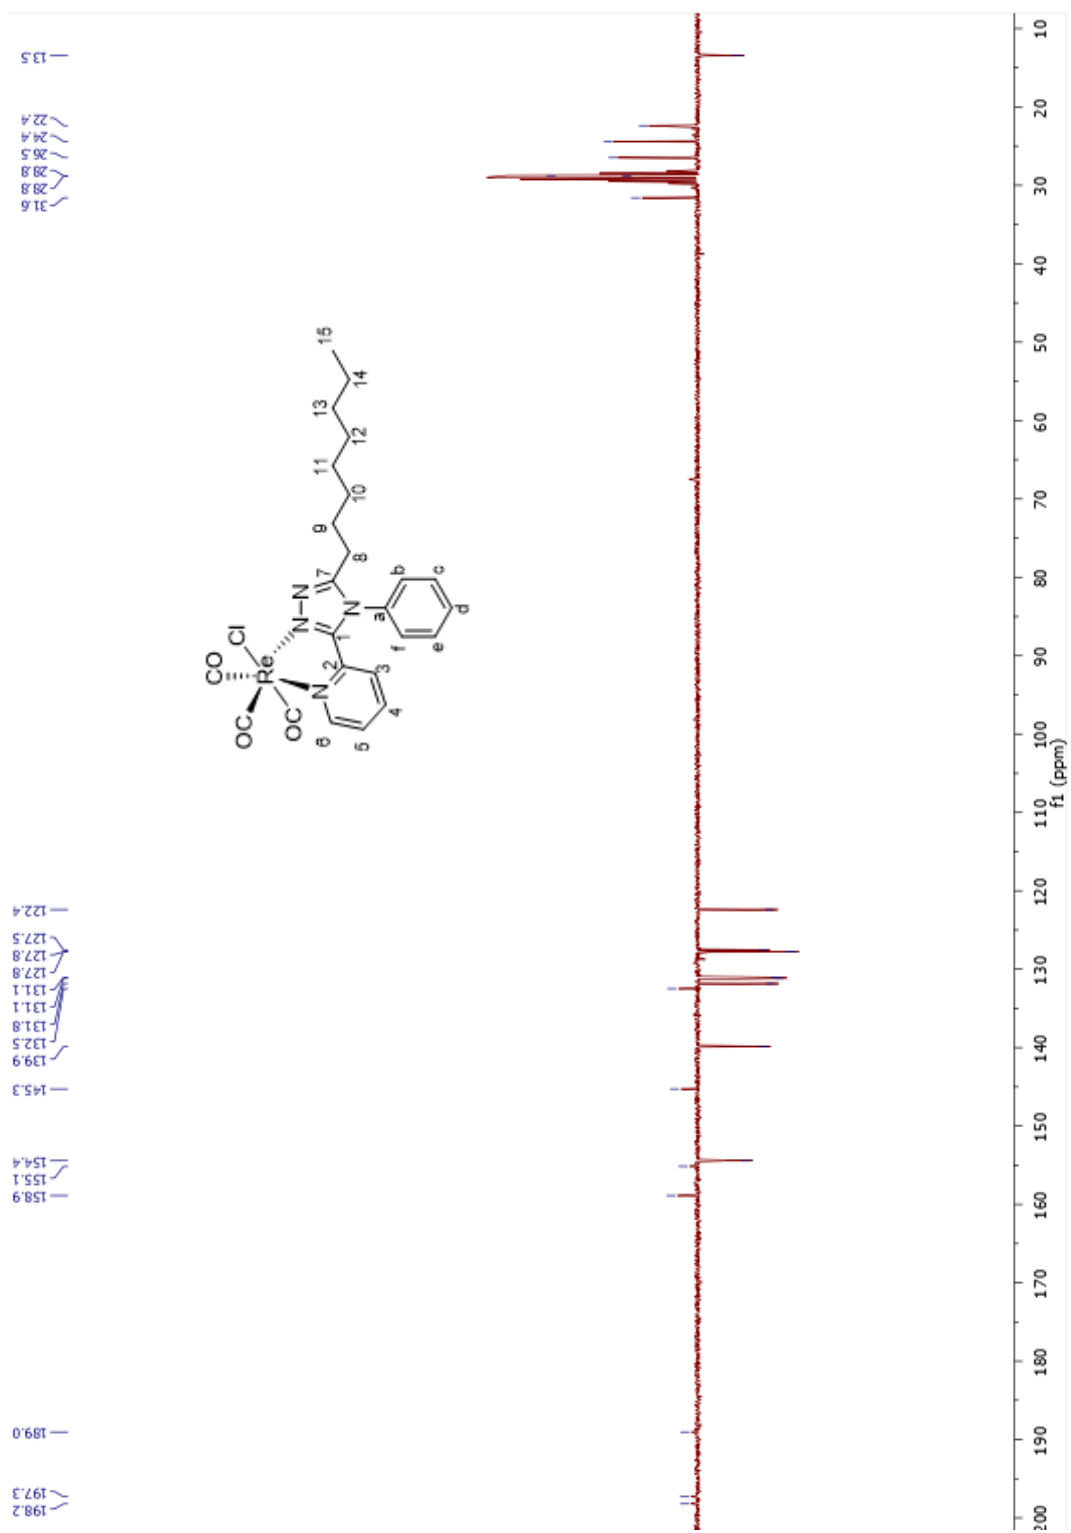

**Figure S14.**  $^{13}\text{C}$  NMR spectrum of complex **Mono-Re-Phe** in acetone- $d_6$  at 25°C (300 MHz).

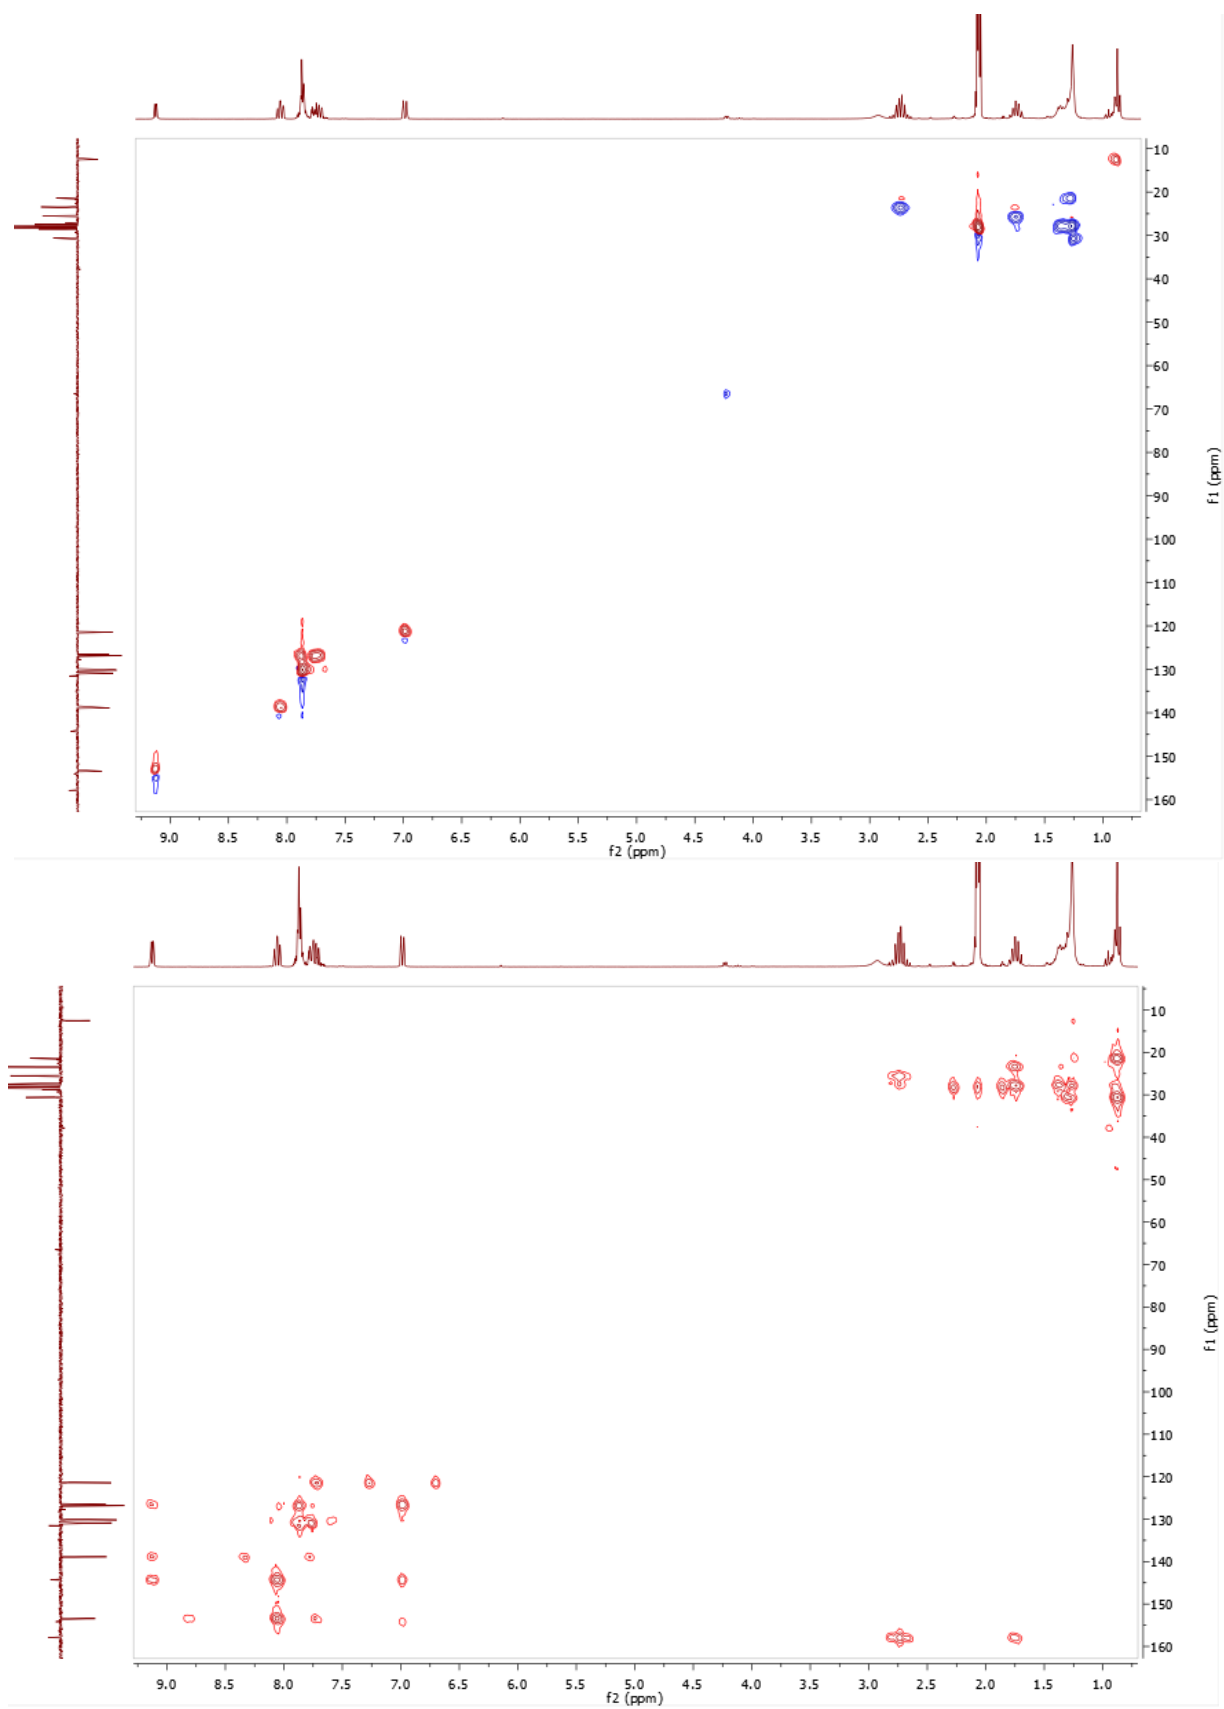

**Figure S15.** HSQC (top) and HMBC (bottom) NMR spectra of complex **Mono-Re-Phe** in acetone- $d_6$  at 25°C (300MHz)



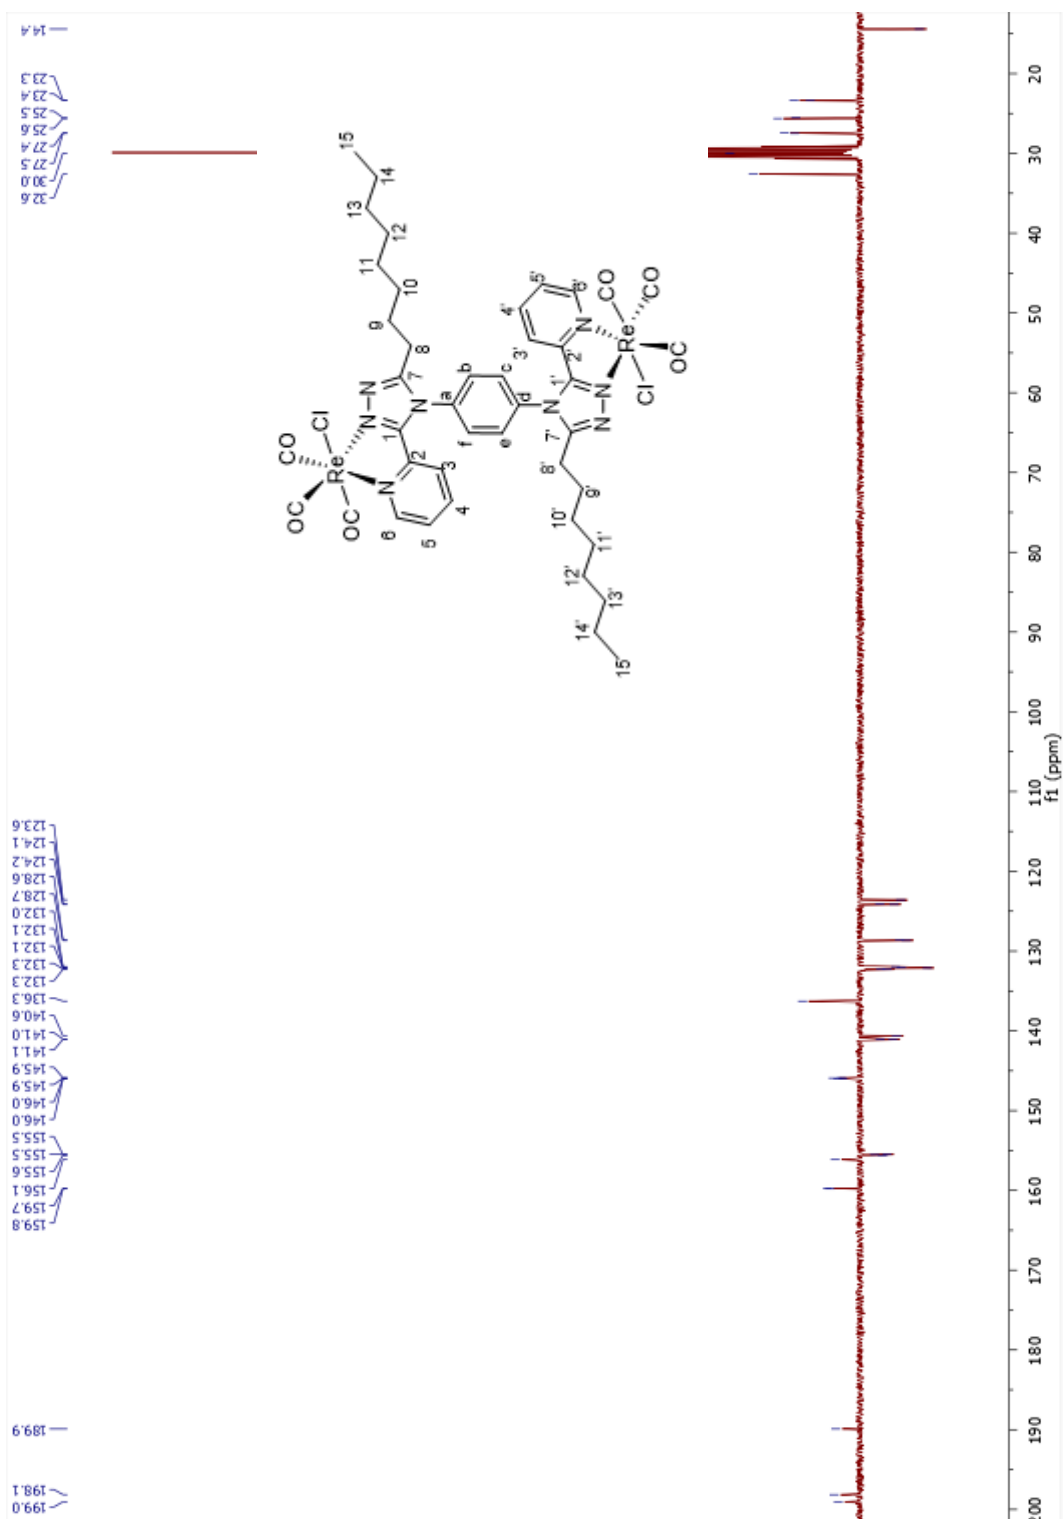

**Figure S17.**  $^{13}\text{C}$  NMR spectrum of complex **Bi-Re-paraPhe** in  $\text{acetone-}d_6$  at  $25^\circ\text{C}$  (300 MHz).

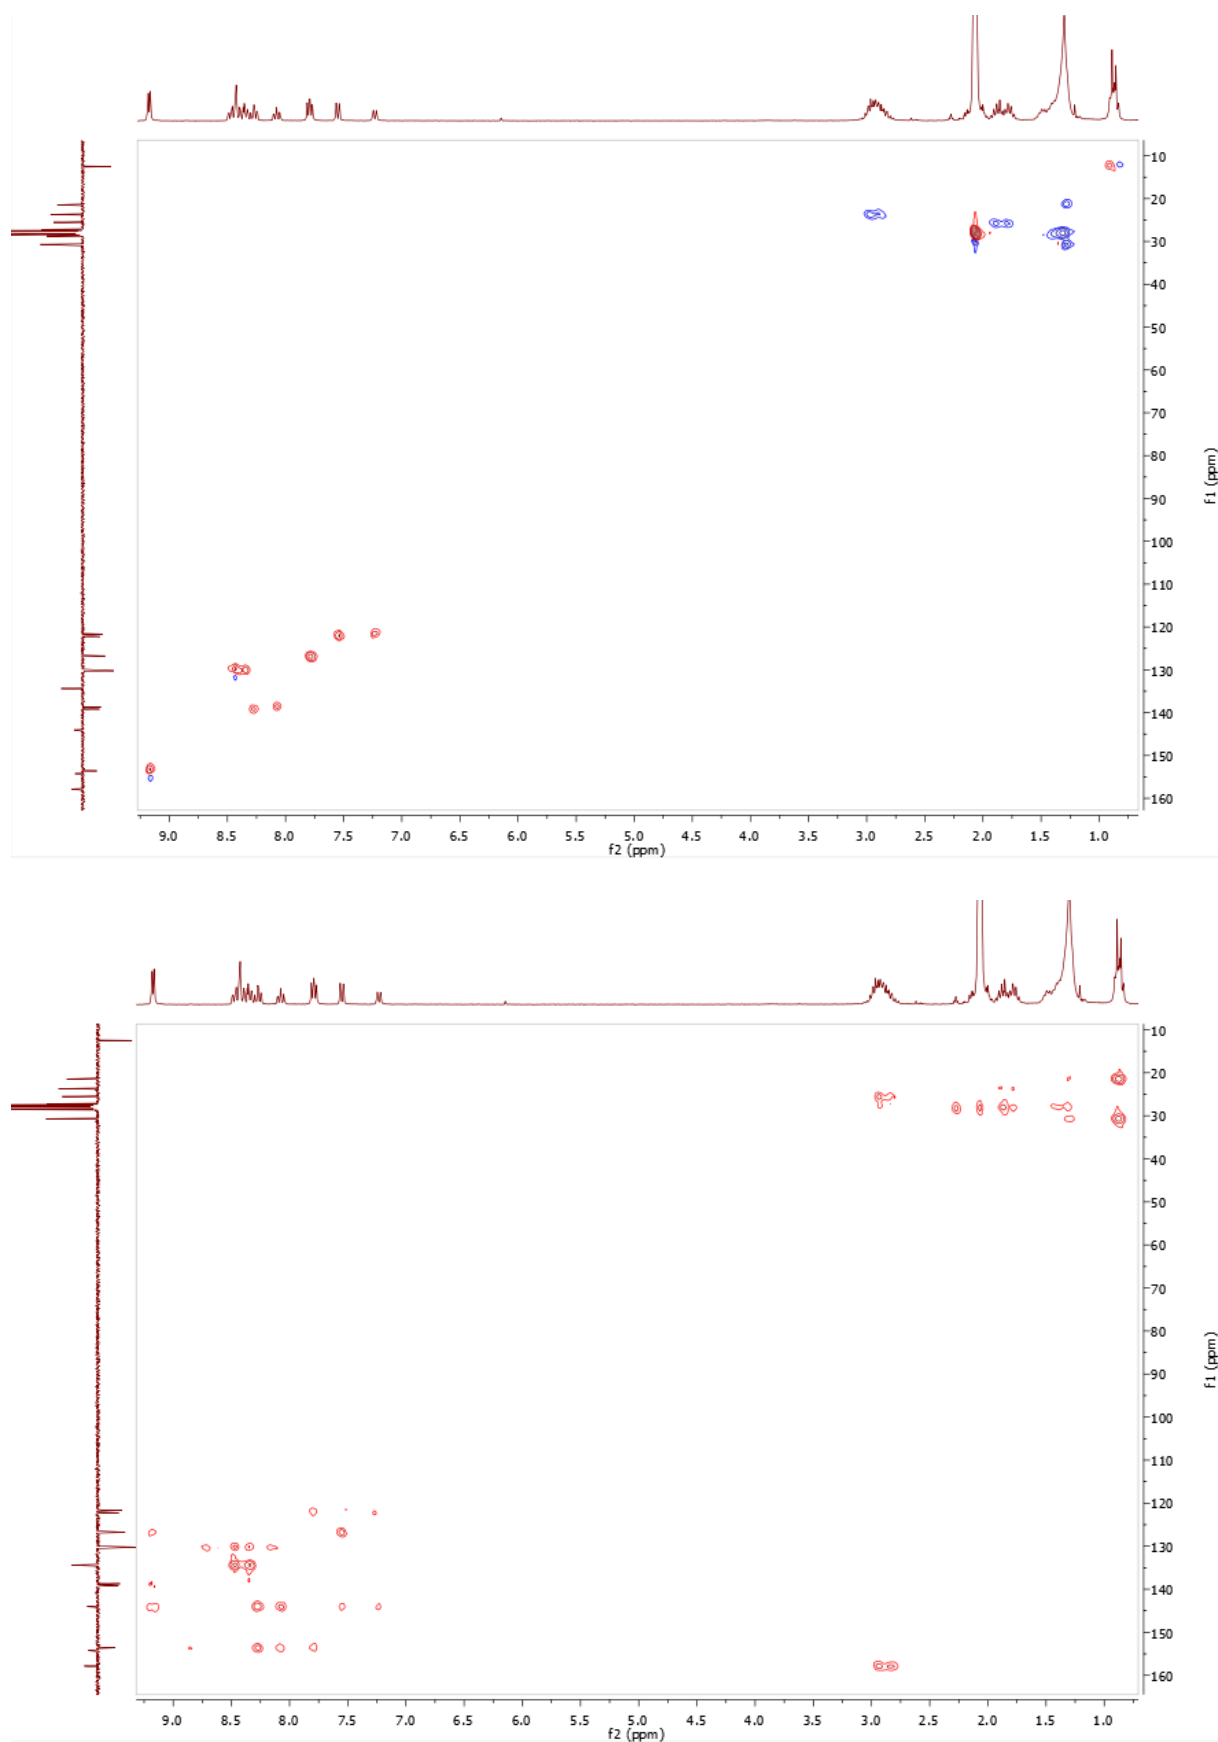

**Figure S18.** HSQC (top) and HMBC (bottom) NMR spectra of complex **Bi-Re-paraPhe** in acetone- $d_6$  at 25°C (300 MHz).

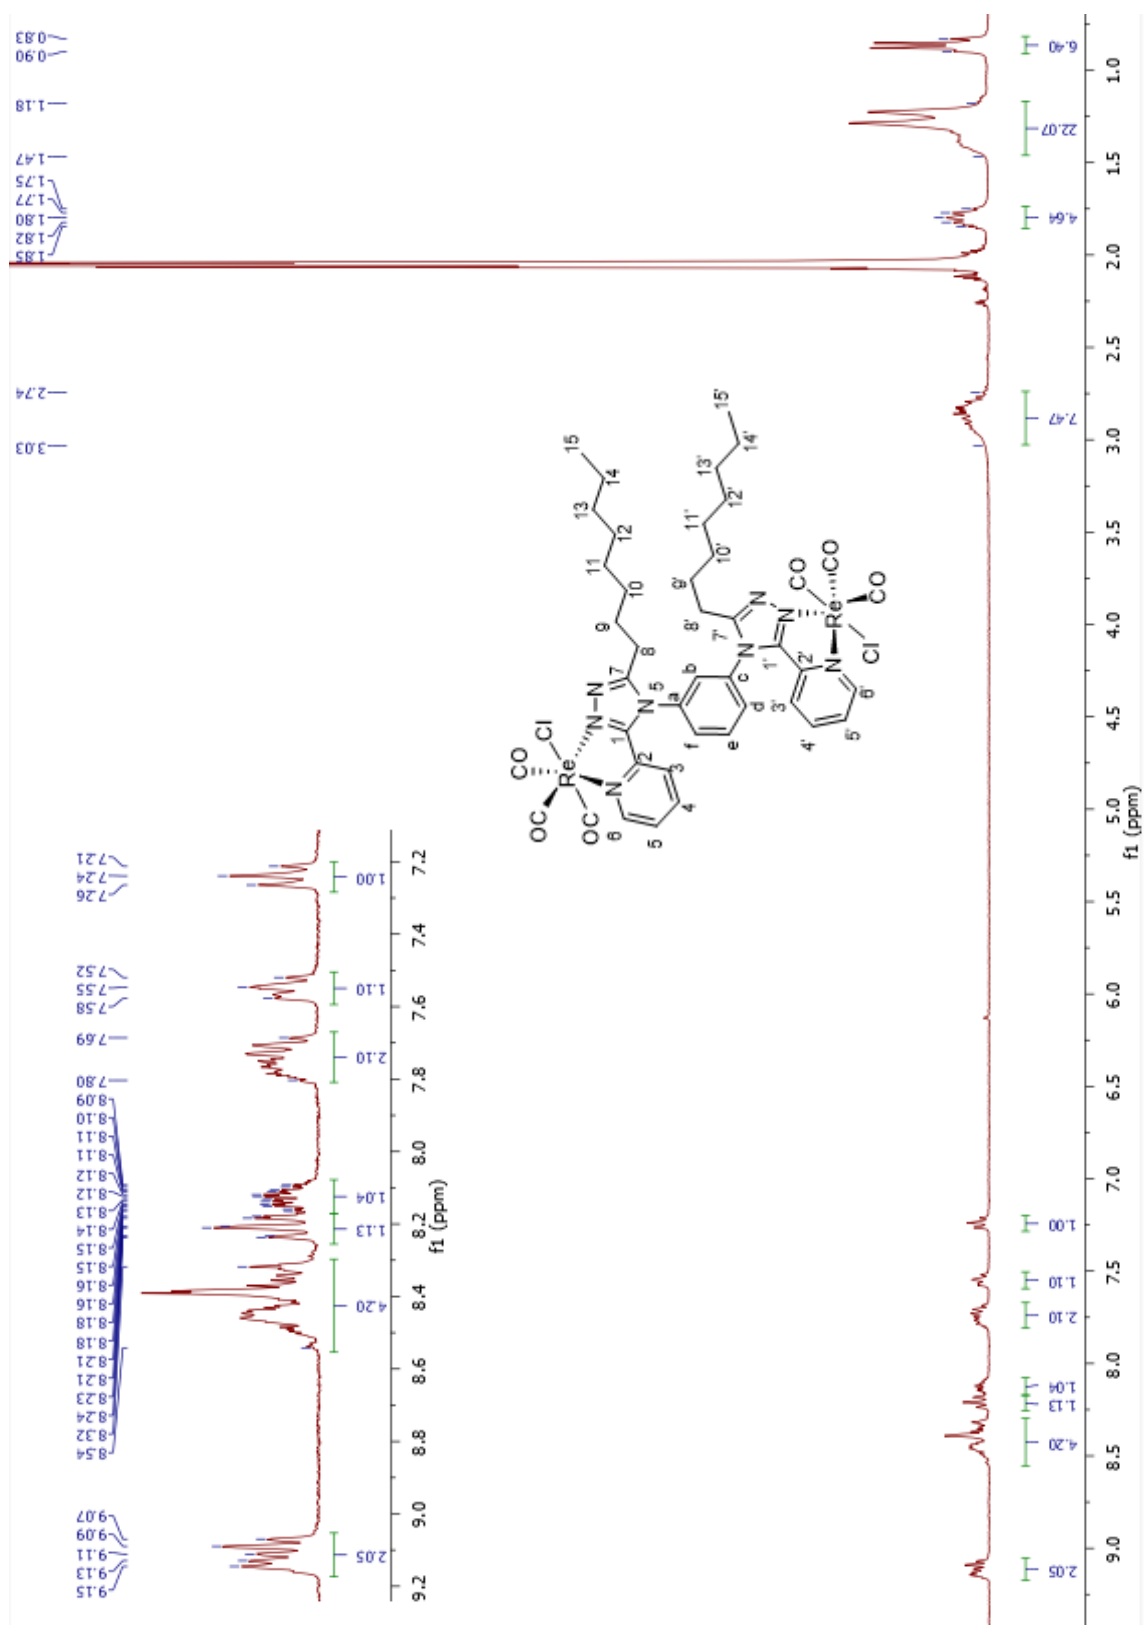

**Figure S19.** <sup>1</sup>H NMR spectrum of complex **Bi-Re-metaPhe** in acetone-*d*<sub>6</sub> at 25°C (300 MHz).



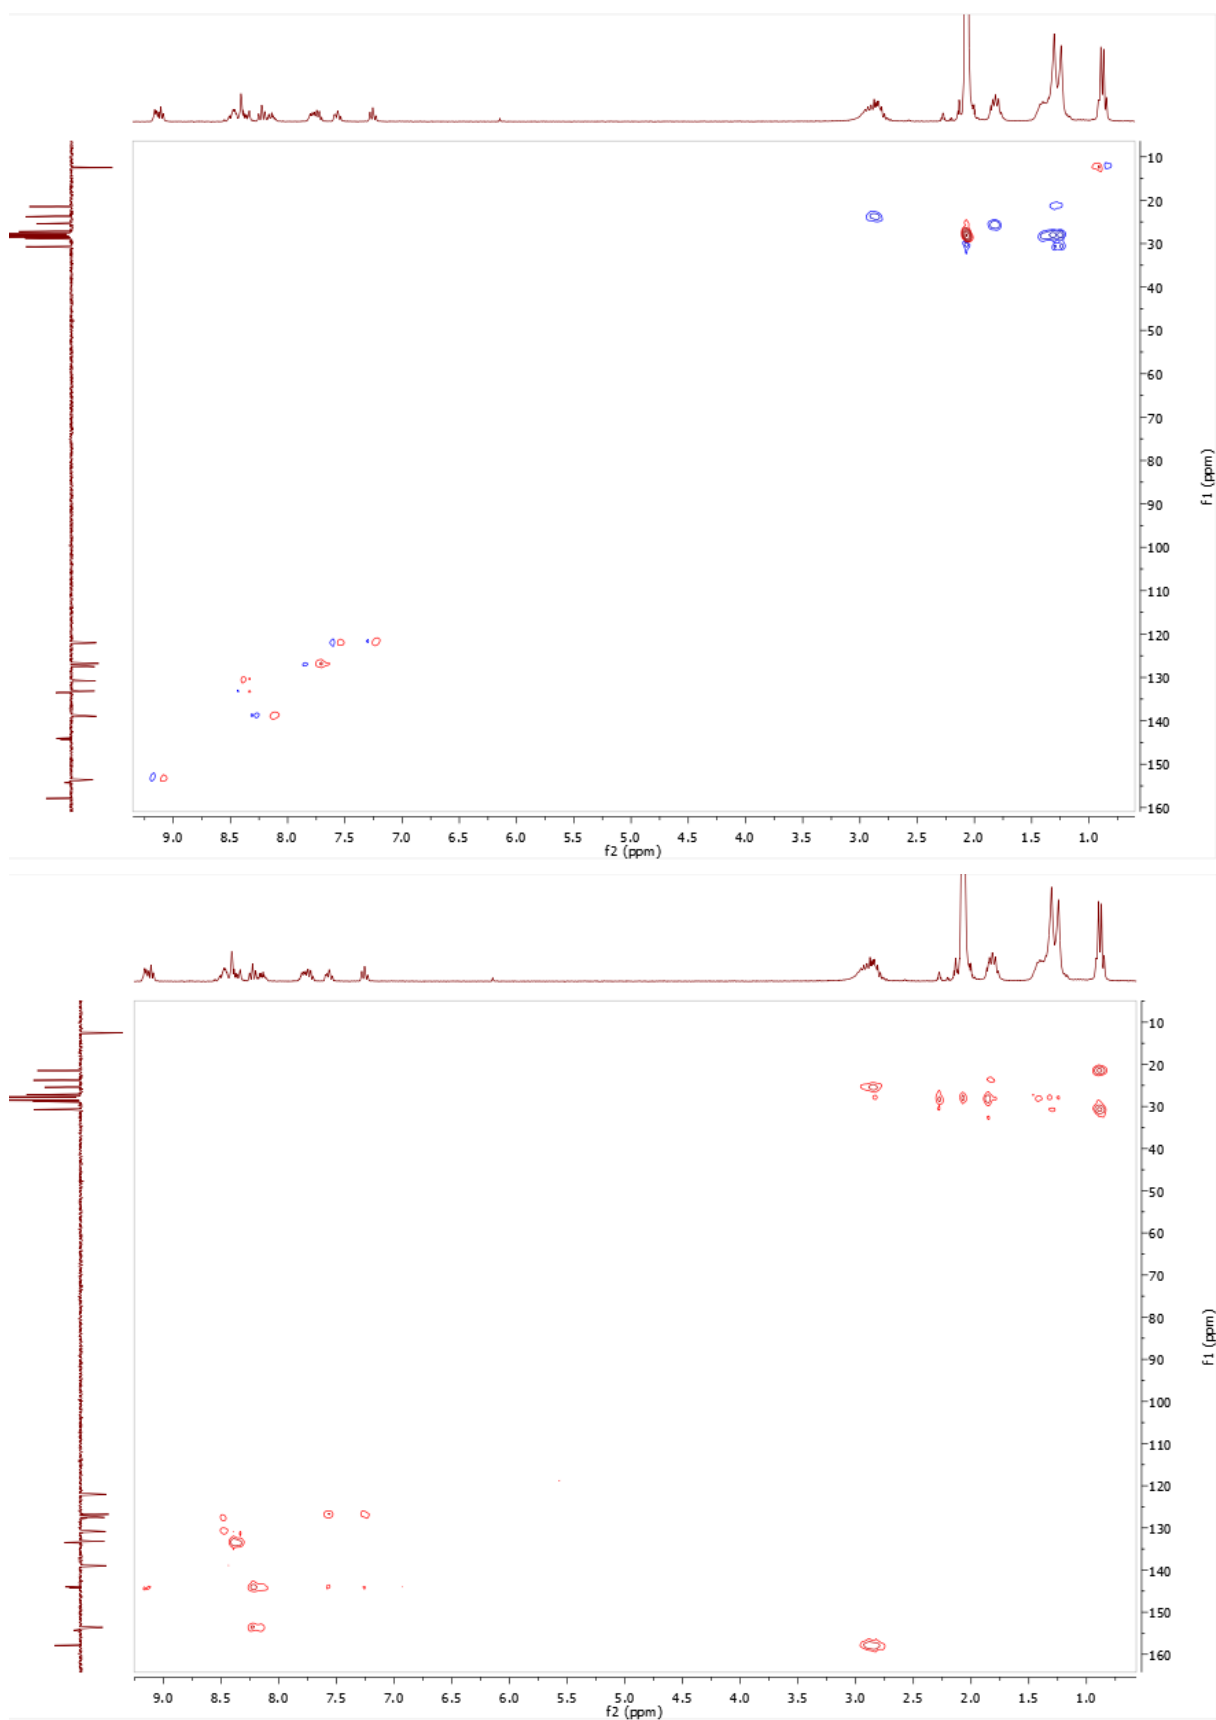

**Figure S21.** HSQC (top) and HMBC (bottom) NMR spectra of complex **Bi-Re-metaPhe** in acetone- $d_6$  at 25°C (300 MHz).



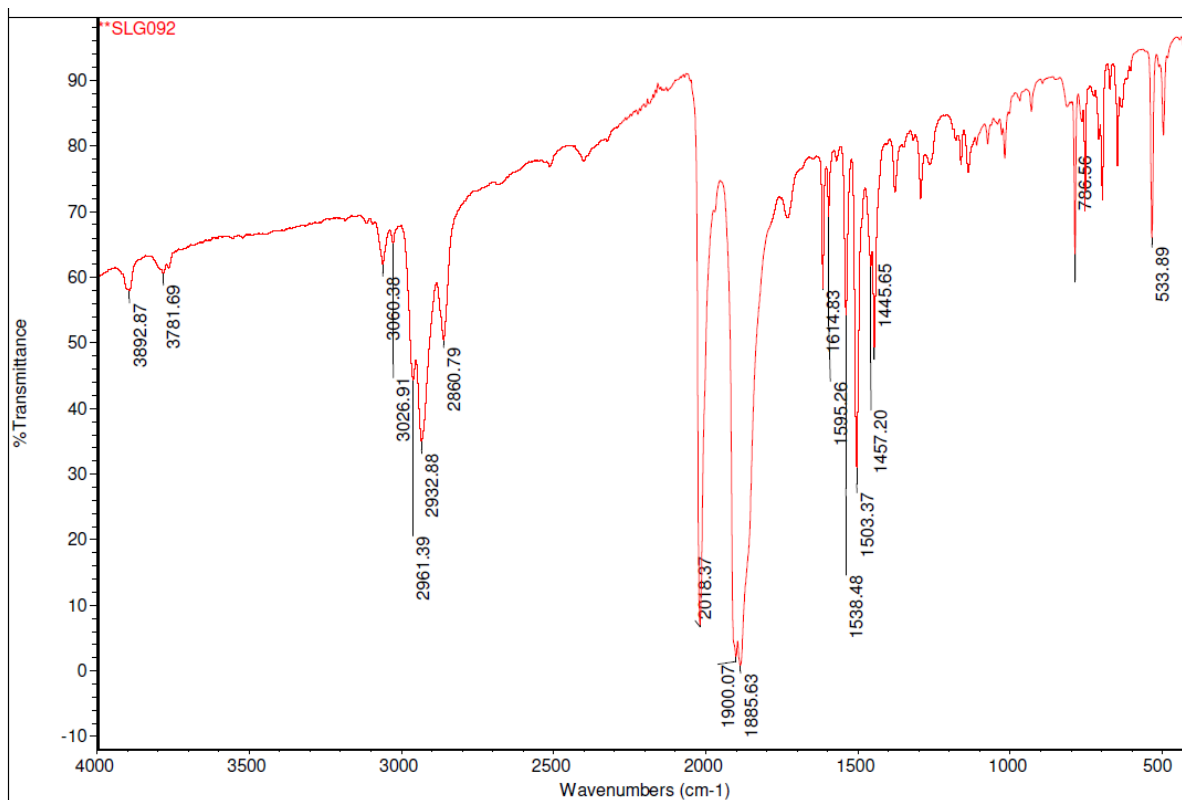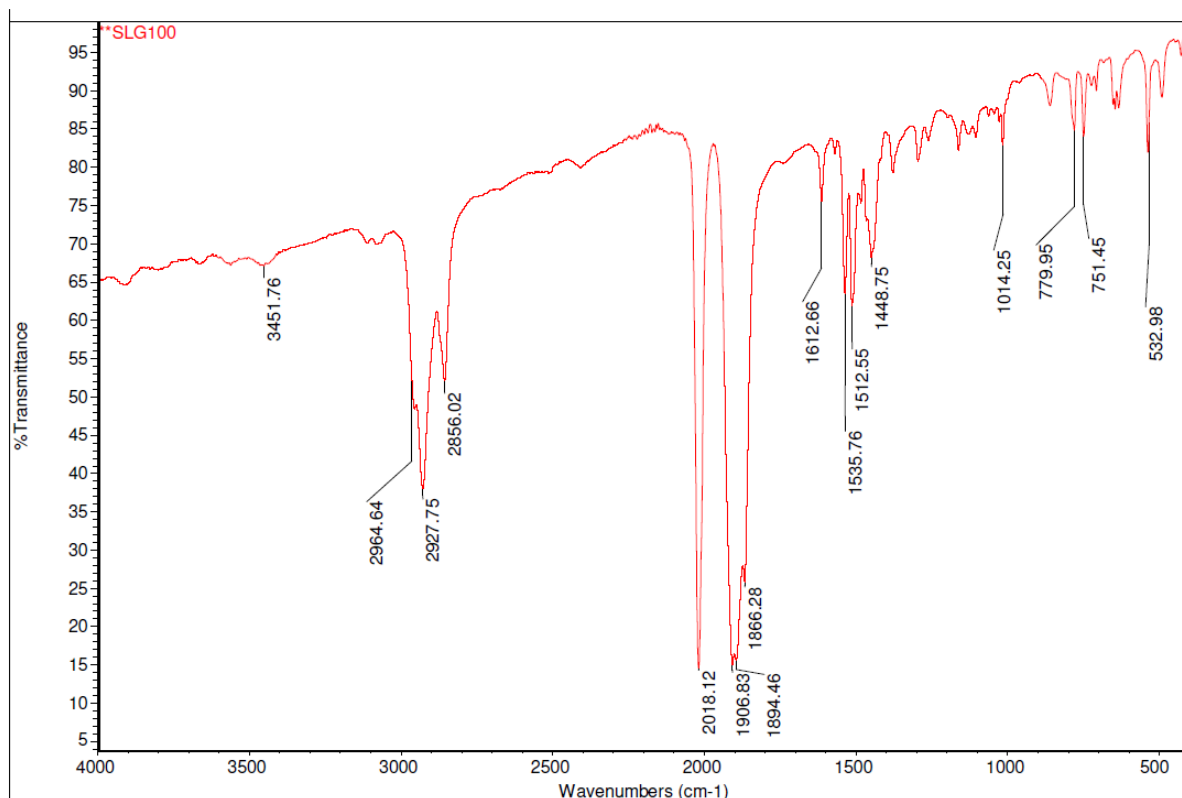

**Figure S22.** ATR FT-IR spectra of microcrystalline powders of complexes **Mono-Re-Phe** (top) and **Bi-Re-paraPhe** (bottom).

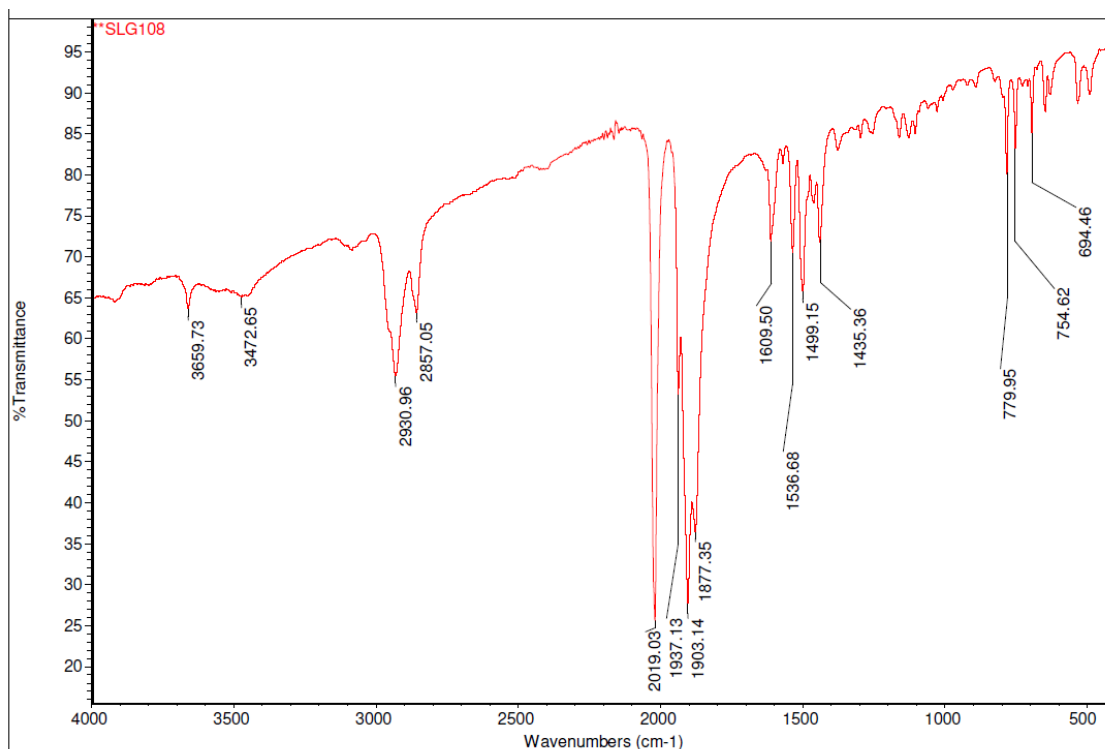

**Figure S23.** ATR FT-IR spectra of the microcrystalline powder of complex **Bi-Re-*meta*Phe**.

### Crystallographic data

**Table S1.** Selected bond lengths (Å) for complexes **Mono-Re-Phe** and **Bi-Re-*meta*Phe**, and ligands **L-*para*Phe** and **L-*meta*Phe**. The atoms were numbered like on the molecular views. For the sake of comparison, each line corresponds to the same bond in each complex. For molecular views, the displacement ellipsoids are drawn at the 50% probability level.

| Bond    | Mono-Re-Phe | Bi-Re- <i>meta</i> Phe | Bond    | L- <i>para</i> Phe | L- <i>meta</i> Phe |
|---------|-------------|------------------------|---------|--------------------|--------------------|
| Re1-C1  | 1.904(2)    | 1.923(13)              | C6-N2   | 1.3161(18)         | 1.312(3)           |
| Re1-C2  | 1.913(4)    | 1.911(2)               | N2-N3   | 1.3919(19)         | 1.394(3)           |
| Re1-C3  | 1.912(2)    | 1.898(10)              | C7- N3  | 1.3154(18)         | 1.310(3)           |
| Re1-N1  | 2.1974 (17) | 2.205(8)               | C7-N4   | 1.3717(17)         | 1.374(2)           |
| Re1-N2  | 2.1411 (16) | 2.154(7)               | C6-N4   | 1.3777(17)         | 1.373(2)           |
| Re1-C11 | 2.4747(6)   | 2.472(3)               | C36- N4 | 1.4396(15)         | ---                |
| O1-C1   | 1.149(3)    | 1.089(15)              | C35- N4 | ---                | 1.437(2)           |
| O2-C2   | 1.148(3)    | 1.134(14)              | C5-C6   | 1.472(2)           | 1.471(3)           |
| O3-C3   | 1.154(3)    | 1.163(13)              | C4-C5   | 1.391(2)           | 1.391(3)           |
|         |             |                        | C5-N1   | 1.3363(19)         | 1.344(3)           |

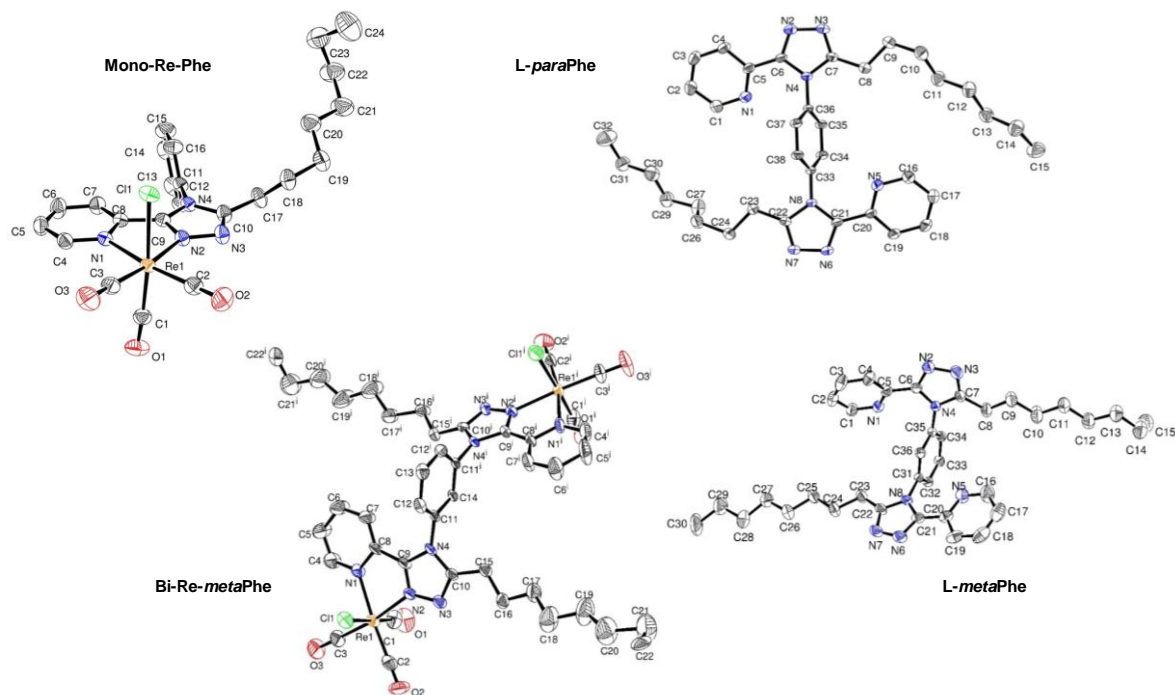

**Table S2.** Selected angles ( $^{\circ}$ ) for complexes **Mono-Re-Phe** and **Bi-Re-metaPhe**, and ligands **L-paraPhe** and **L-metaPhe**. For the sake of comparison, each line corresponds to the same bond in each complex. The atoms were numbered like on the molecular views.

| Angle      | Mono-Re-Phe | Bi-Re-metaPhe | Angle      | L-paraPhe  | L-metaPhe  |
|------------|-------------|---------------|------------|------------|------------|
| C1-Re1-C2  | 90.34(10)   | 90.4(5)       | C4-C5-C6   | 120.23(14) | 118.86(19) |
| C1-Re1-C3  | 87.66(10)   | 89.0(5)       | N1-C5-C6   | 116.55(12) | 117.55(18) |
| C2-Re1-C3  | 87.92(10)   | 90.0(5)       | N2-C6-C5   | 124.60(12) | 124.66(18) |
| C1-Re1-N1  | 91.22(8)    | 95.2(5)       | N4-C6-C5   | 125.55(12) | 125.73(18) |
| C2-Re1-N1  | 171.22(8)   | 170.5(4)      | C6-N2-N3   | 107.63(11) | 107.80(17) |
| C3-Re1-N1  | 100.78(8)   | 97.8(4)       | C7-N3-N2   | 107.27(12) | 107.32(17) |
| C1-Re1-N2  | 96.75(8)    | 94.4(4)       | N3-C7-N4   | 110.28(13) | 109.96(18) |
| C2-Re1-N2  | 97.23(8)    | 97.7(4)       | C6-N4-C7   | 104.99(11) | 105.34(16) |
| C3-Re1-N2  | 173.18(8)   | 171.6(4)      | C7-N4-C36  | 125.31(11) | ---        |
| N1-Re1-N2  | 74.01(6)    | 74.2(3)       | C6-N4-C36  | 129.70(11) | ---        |
| C1-Re1-C11 | 174.68(7)   | 177.8(4)      | C35-C36-N4 | 118.87(11) | ---        |
| C2-Re1-C11 | 94.92(7)    | 91.0(3)       | C37-C36-N4 | 119.41(11) | ---        |
| C3-Re1-C11 | 91.76(7)    | 92.7(4)       | C7-N4-C35  | ---        | 124.68(16) |
| N1-Re1-C11 | 83.69(5)    | 83.2(2)       | C6-N4-C35  | ---        | 129.37(16) |
| N2-Re1-C11 | 83.37(5)    | 83.8(2)       | C36-C35-N4 | ---        | 118.89(17) |
| O1-C1-Re1  | 175.7(2)    | 176.4(13)     | C34-C35-N4 | ---        | 119.98(16) |
| O2-C2-Re1  | 179.0(2)    | 177.2(10)     |            |            |            |
| O3-C3-Re1  | 177.7(2)    | 178.9(13)     |            |            |            |

### Comment S1. Crystal lattice of Re-Phe

In the crystal lattice of **Re-Phe**, two neighboring molecules, each with Re2 centre, interact with each other *via* two C26–H26(trz)···Cl2 interactions to form centrosymmetric  $R_2^2(12)$  dimers (Fig. S24). These dimers are connected into loop chain *via* intermolecular C20–H20(py)<sub>Re2</sub>···Cl1<sub>Re1</sub> and C22–H22(py)<sub>Re2</sub>···O3(CO)<sub>Re1</sub> interactions along the *ab* plane (Fig. S25). They are also linked into stair chain by an aromatic intermolecular parallel displaced  $\pi(\text{py})_{\text{Re2}}-\pi(\text{py})_{\text{Re2}}$  stacking interactions with a centroid–centroid distance of 3.871(5)Å, a dihedral angle of 29.0° and a slip angle of 1.877° along *a*-axis (Fig. S26). The neighboring molecules with Re1 and Re2 centres share intermolecular C22–H22(py)<sub>Re2</sub>···O3(CO)<sub>Re1</sub> and C10–H10(trz)<sub>Re1</sub>···O4(CO)<sub>Re2</sub> interactions forming a zig-zag chain along the *ac* plane (Fig. S26). The presence of intramolecular C23–H23(py)··· $\pi(\text{Ph})$  interactions was also detected in the crystal lattice of **Re-Phe**.

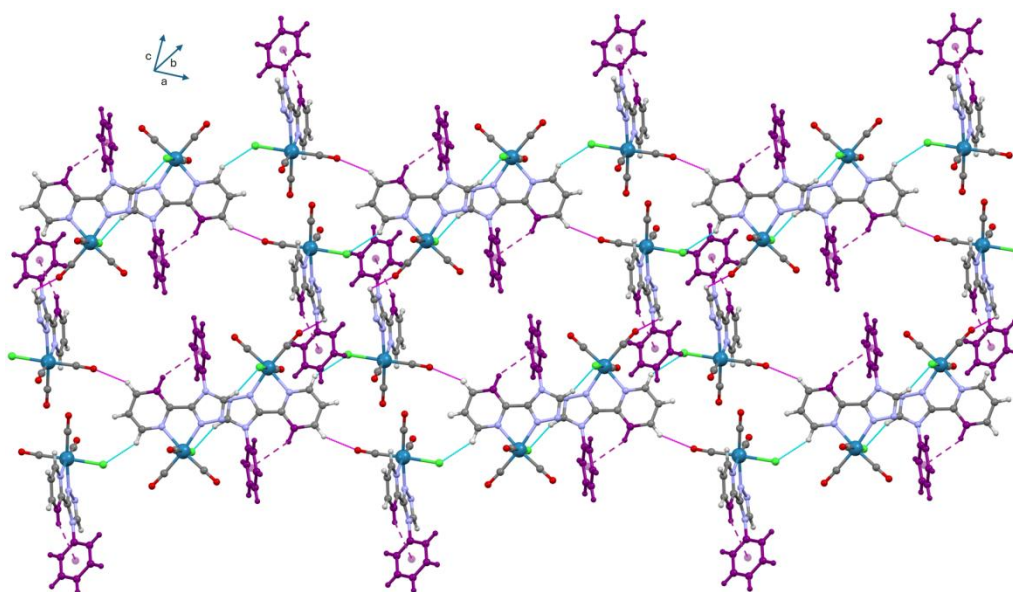

**Figure S24.** (a) Centrosymmetric  $R_2^2(12)$  dimers of **Re-Phe** formed *via* intermolecular C26–H26(trz)···Cl2 (cyan color) interactions of two antiparallel Re2 molecules. (b) Dimers linked through C20–H20(py)<sub>Re2</sub>···Cl1<sub>Re1</sub> (cyan color) and C22–H22(py)<sub>Re2</sub>···O3(CO)<sub>Re1</sub> (magenta color) interactions viewed along the *ab* plane and C10–H10(trz)<sub>Re1</sub>···O4(CO)<sub>Re2</sub> (magenta color) interactions viewed along the *ac* plane and stabilized by intramolecular C23–H23(py)··· $\pi(\text{Ph})$  (tyrian purple color) interactions.

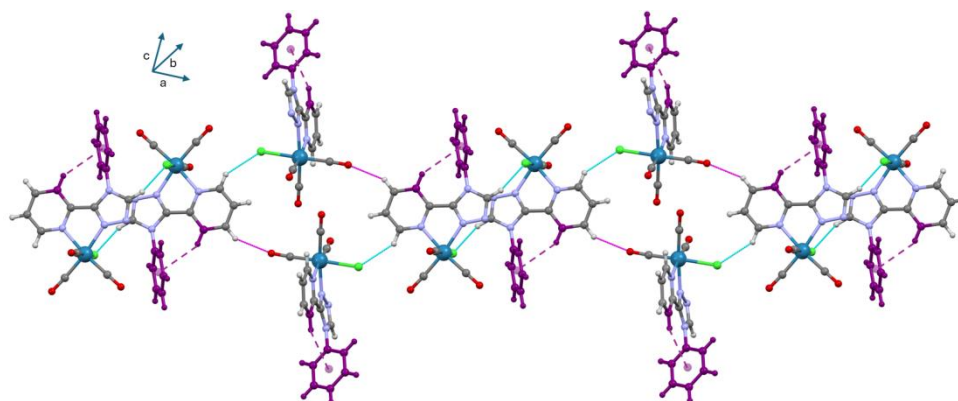

**Figure S25.** Dimers of **Re-Phe** connected *via* intermolecular C20–H20(py)<sub>Re2</sub>···Cl1<sub>Re1</sub> (cyan color) and C22–H22(py)<sub>Re2</sub>···O3(CO)<sub>Re1</sub> (magenta color) interactions into loop chain viewed along *ab* plane and stabilized by intramolecular C23–H23(py)··· $\pi(\text{Ph})$  (tyrian purple color) interactions.

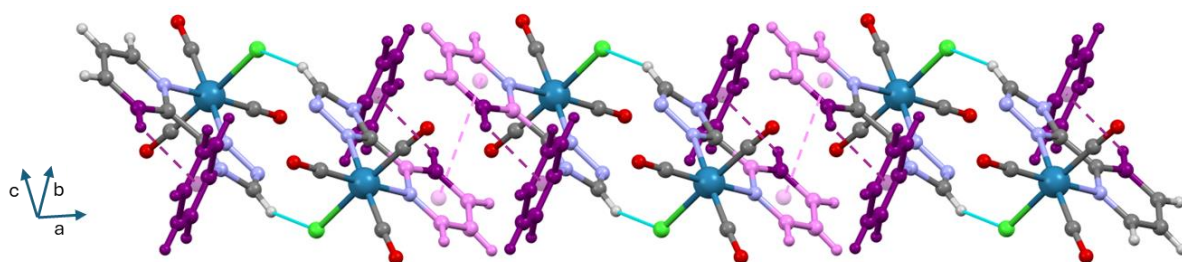

**Figure S26.** Dimers of **Re-Phe** linked by aromatic intermolecular parallel displaced  $\pi(\text{py})_{\text{Re}2}-\pi(\text{py})_{\text{Re}2}$  stacking interactions (violet color) into stair chain viewed along  $a$ -axis and stabilized by intramolecular  $\text{C}23-\text{H}23(\text{py})\cdots\pi(\text{Ph})$  (tyrian purple color) interactions.

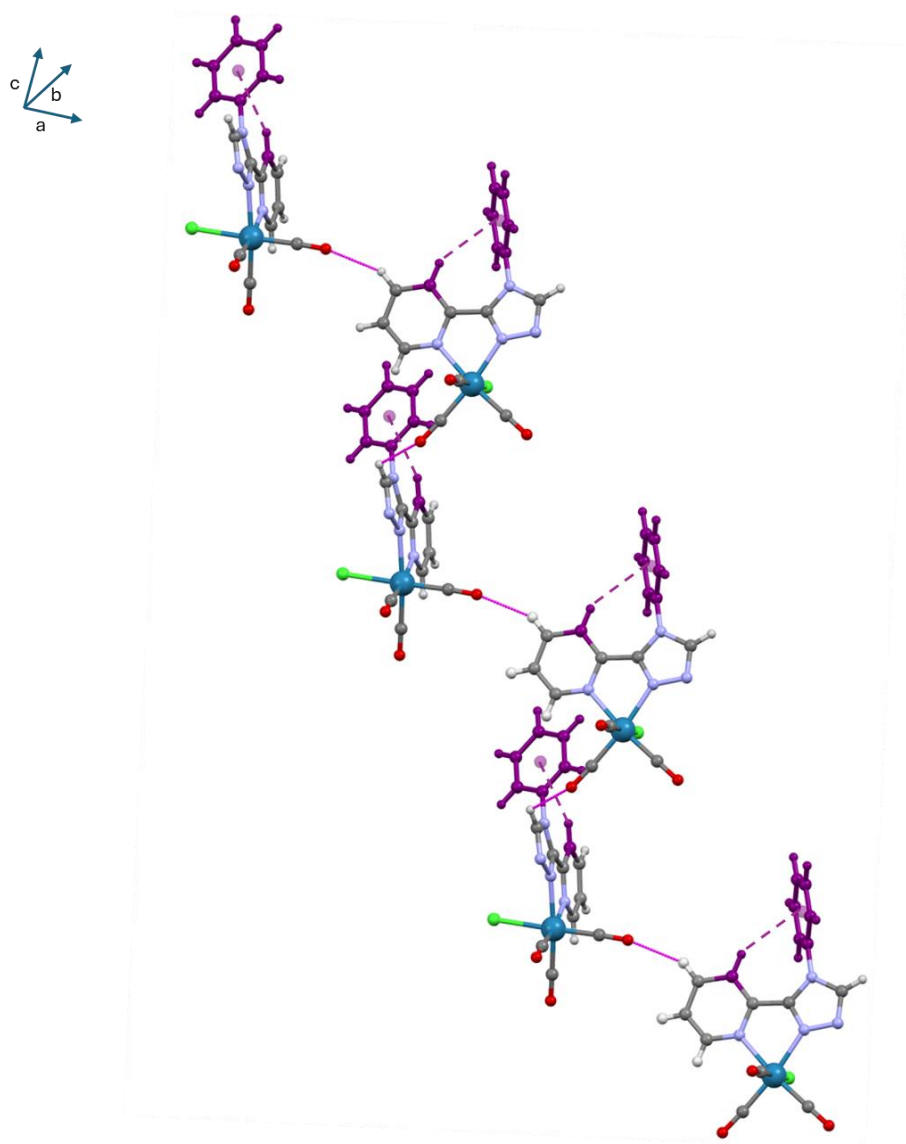

**Figure S27.** Neighboring molecules of **Re-Phe** with  $\text{Re}1$  and  $\text{Re}2$  centres connected *via* intermolecular  $\text{C}22-\text{H}22(\text{py})_{\text{Re}2}\cdots\text{O}3(\text{CO})_{\text{Re}1}$  and  $\text{C}10-\text{H}10(\text{trz})_{\text{Re}1}\cdots\text{O}4(\text{CO})_{\text{Re}2}$  (magenta color) interactions into a zig-zag chain viewed along the  $ac$  plane and stabilized by intramolecular  $\text{C}23-\text{H}23(\text{py})\cdots\pi(\text{Ph})$  (tyrian purple color) interactions.



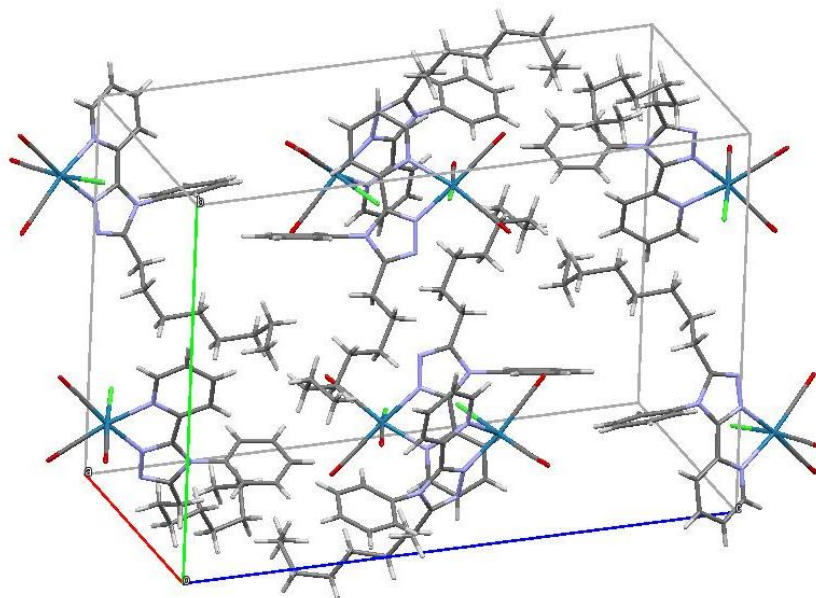

**Figure S28.** Crystal cell of complex **Mono-Re-Phe**.

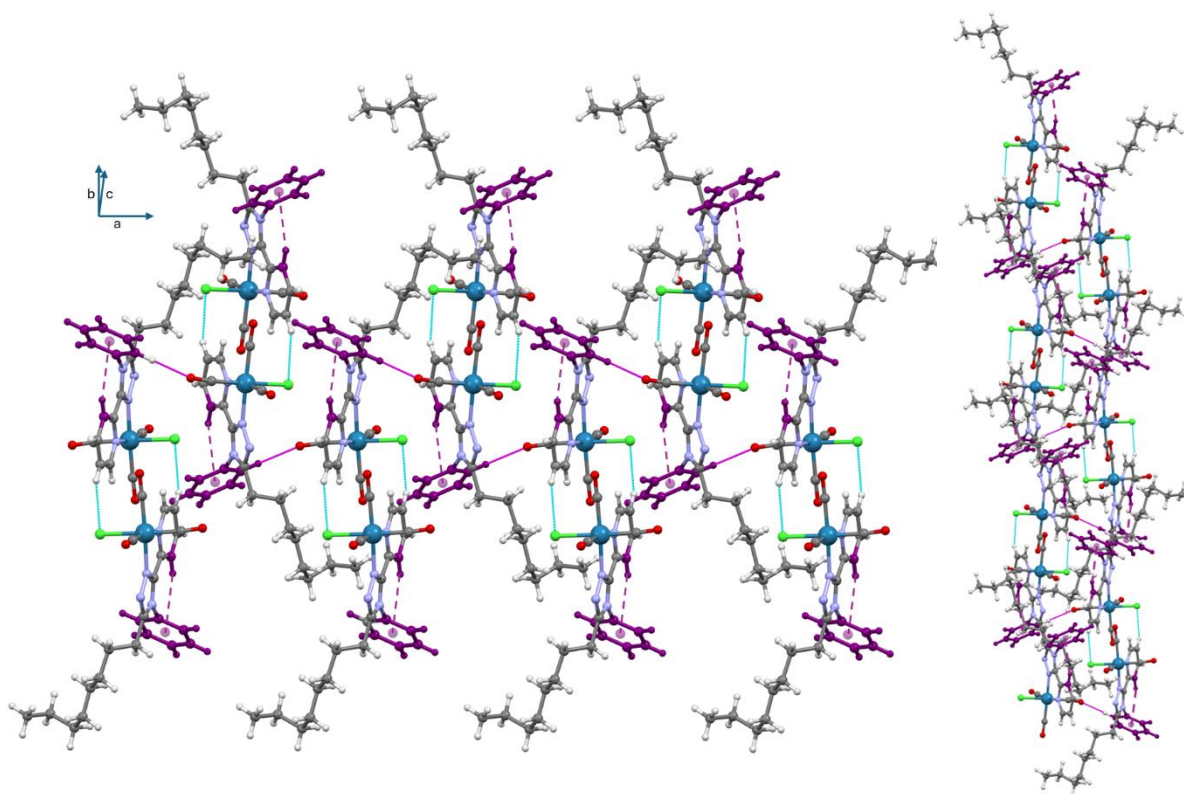

**Figure S29.** Centrosymmetric  $R_2^2(12)$  dimers of complex **Mono-Re-Phe** formed *via* intermolecular C5–H5(trz)···C11 (cyan color) interactions of two antiparallel Re1 molecules. Dimers linked through C16–H16(Ph)···O1(CO) (magenta color) interactions are viewed along the *ab*-plane and stabilized by intramolecular C7–H7(py)··· $\pi$ (Ph) (tyrian purple color) interactions.

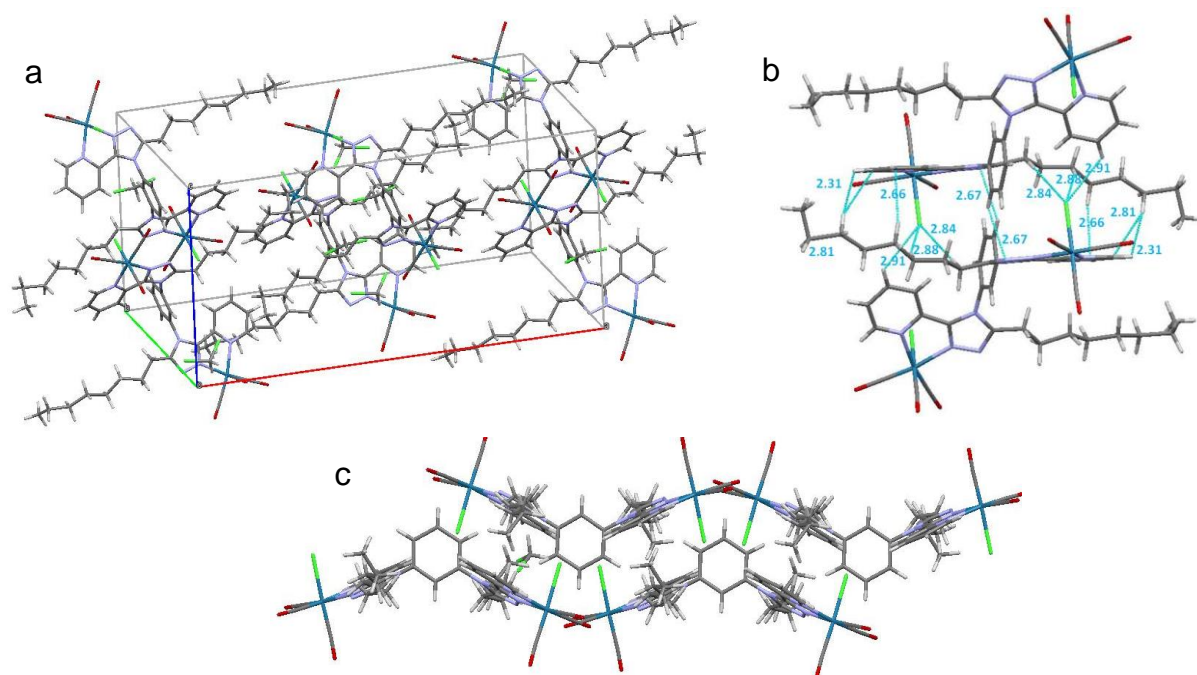

**Figure S30.** (a) Crystal cell of complex **Bi-Re-*meta*Phe**, (b) neighboring molecules forming dimers with short contact distances indicated in blue ink (in Å), and (c) molecular view perpendicular to the central phenyl ring.

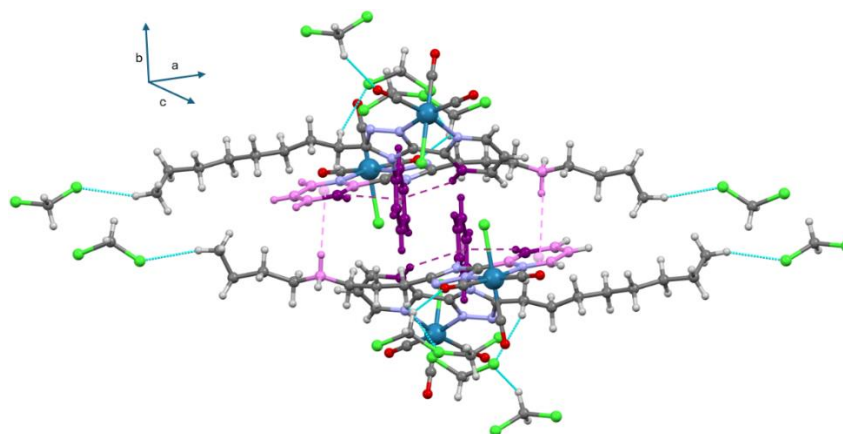

**Figure S31.** Intermolecular C7–H7(py)⋯ $\pi$ (*m*-Xyl) (violet color) and intramolecular C18–H18A(CH<sub>2</sub>)<sub>octyl</sub>⋯ $\pi$ (py) (tyrian purple color) interactions in **Bi-Re-*meta*Phe**.

**Table S3.** Octahedral distortion parameters of **Re-Phe**, **Mono-Re-Phe** and **Bi-Re-*meta*Phe**.

| Metal complex               | Octahedral distortion parameters |              |              |                        |
|-----------------------------|----------------------------------|--------------|--------------|------------------------|
|                             | $\zeta$ , Å                      | $\Sigma$ , ° | $\Theta$ , ° | Volume, Å <sup>3</sup> |
| <b>Re-Phe</b>               | 1.15/1.13                        | 63.3/66.7    | 169/164      | 11.85/11.83            |
| <b>Mono-Re-Phe</b>          | 1.08                             | 66.4         | 188          | 11.87                  |
| <b>Bi-Re-<i>meta</i>Phe</b> | 1.10                             | 59.3         | 157          | 11.97                  |

**Table S4.** Experimental and DFT-optimized octahedral distortion parameters in the singlet ( $S_0$ , ground;  $S_1$ , excited) and triplet ( $T_1$ , excited) states of **Re-Phe**, **Mono-Re-Phe** and **Bi-Re-meta-Phe**.

| Metal Complex        | Re-Phe    |       |       |       | Mono-Re-Phe |       |       |       | Bi-Re-meta-Phe |       |             |             |
|----------------------|-----------|-------|-------|-------|-------------|-------|-------|-------|----------------|-------|-------------|-------------|
|                      | Exp.      | Calc. |       |       | Exp.        | Calc. |       |       | Exp.           | Calc. |             |             |
|                      |           | $S_0$ | $S_1$ | $T_1$ |             | $S_0$ | $S_1$ | $T_1$ |                | $S_0$ | $S_1$       | $T_1$       |
| $\zeta$ , Å          | 1.15/1.13 | 1.16  | 0.81  | 0.84  | 1.08        | 1.15  | 0.80  | 0.87  | 1.10           | 1.15  | 1.15/0.81   | 1.15/0.86   |
| $\Sigma$ , °         | 63.3/66.7 | 58.7  | 51.8  | 49.2  | 66.4        | 58.4  | 50.8  | 47.7  | 59.3           | 58.8  | 58.6/51.4   | 58.7/48.1   |
| $\Theta$ , °         | 169/164   | 166   | 182   | 171   | 188         | 166   | 180   | 164   | 157            | 167   | 167/181     | 167/165     |
| $V$ , Å <sup>3</sup> | 11.9/11.8 | 12.1  | 11.9  | 11.9  | 11.87       | 12.06 | 11.88 | 11.91 | 11.97          | 12.06 | 12.06/11.89 | 12.06/11.91 |
| $\mu$ , D            | –         | 7.90  | 3.82  | 4.25  | –           | 7.94  | 4.13  | 4.82  | –              | 4.19  | 4.51        | 4.10        |

| Metal Complex        | Bi-Re-para-Phe |             |             |
|----------------------|----------------|-------------|-------------|
|                      | Calc.          |             |             |
|                      | $S_0$          | $S_1$       | $T_1$       |
| $\zeta$ , Å          | 1.15           | 1.15 / 0.80 | 1.15 / 0.85 |
| $\Sigma$ , °         | 58.7           | 58.6 / 51.5 | 58.8 / 48.2 |
| $\Theta$ , °         | 167            | 166 / 181   | 167 / 165   |
| $V$ , Å <sup>3</sup> | 12.1           | 12.1 / 11.9 | 12.1 / 11.9 |
| $\mu$ , D            | 0.00           | 4.20        | 3.91        |

Octahedral distortion parameters are composed of three parameters: one bond-length distortion parameter  $\zeta$  and two bond-angle distortion parameters  $\Sigma$  and  $\Theta$ .  $\zeta$  is the average of the sum of the deviation of six unique metal–ligand bond lengths around the central metal atom ( $d_i$ ) from the average value ( $d_{\text{mean}}$ ).  $\Sigma$  can be defined as the sum of the deviation of the twelve *cis* L–Re–L angles  $\phi_i$  from 90°.  $\Sigma$  is a general measure of the deviation of a metal ion from an ideal octahedral geometry.  $\Theta$  can be defined as the sum of the deviation of the 24 torsional angles between the ligand atoms on opposite triangular faces of the octahedron viewed along the pseudo-threefold axis ( $\theta_i$ ) from 60°.  $\Theta$  represents the distortion of the  $MX_6$  geometry from perfectly octahedral ( $O_h$ ) to trigonal prismatic ( $D_{3h}$ ). Distortion parameters  $\zeta$ ,  $\Sigma$  and  $\Theta$  were calculated using the OctaDist software (R. Ketkaew, Y. Tantirungrotechai, P. Harding, G. Chastanet, P. Guionneau, M. Marchivie, D. J. Harding, *Dalton Trans.*, 2021, **50**, 1086–1096). All values lie in the expected range observed for distorted quasi-octahedral Re(I) complexes. In fact, a perfectly octahedral complex would give  $\zeta = \Sigma = \Theta = 0$ .

**Table S5.** Short contacts detected in structures of **Re-Phe**, **Mono-Re-Phe** and **Bi-Re-meta-Phe**.

| D—H...A               | D—H [Å] | H...A [Å] | D...A [Å] | D—H...A [°]      | Symmetry codes          |
|-----------------------|---------|-----------|-----------|------------------|-------------------------|
| <b>Re-Phe</b>         |         |           |           |                  |                         |
| C10—H10...O4          | 0.95    | 2.42      | 2.994(11) | 119              | $x, y, z$               |
| C10—H10...C11         | 0.95    | 2.75      | 3.552(10) | 142' / 92' / 353 | $2-x, 1-y, 1-z$         |
| C20—H20...C11         | 0.95    | 2.72      | 3.492(9)  | 139              | $2-x, 1-y, 1-z$         |
| C22—H22...O3          | 0.95    | 2.47      | 3.337(12) | 151              | $1+x, y, -1+z$          |
| C26—H26...C12         | 0.95    | 2.67      | 3.454(10) | 140              | $1-x, 2-y, -z$          |
| <b>Mono-Re-Phe</b>    |         |           |           |                  |                         |
| C5—H5...C11           | 0.95    | 2.77      | 3.659(3)  | 157              | $1-x, -y, 1-z$          |
| C16—H16...O1          | 0.95    | 2.61      | 3.721     | 163              | $-1/2+x, 1/2-y, 1-z$    |
| <b>Bi-Re-meta-Phe</b> |         |           |           |                  |                         |
| C15—H15B...C12        | 0.99    | 2.61      | 3.40(3)   | 137              | $-1/2+x, 3/2-y, -1/2+z$ |
| C22—H22A...O3         | 0.98    | 2.55      | 3.51(2)   | 164              | $x, y, z$               |
| C22—H22B...C13        | 0.98    | 2.72      | 3.64(2)   | 157              | $1/2+x, 1/2+y, z$       |
| C23—H23B...O2         | 0.99    | 2.44      | 3.25(2)   | 138              | $x, y, z$               |



**Table S6.** Geometrical parameters ( $\text{\AA}$ ,  $^\circ$ ) for C–H $\cdots\pi$  interactions detected in structures of **Re-Phe**, **Mono-Re-Phe** and **Bi-Re-metaPhe**.

| X—H(i) $\cdots$ Cg(i)                 | H $\cdots$ Cg [ $\text{\AA}$ ] | X $\cdots$ Cg [ $\text{\AA}$ ] | X—H $\cdots$ Cg [ $^\circ$ ] | H-Perp | Gamma |
|---------------------------------------|--------------------------------|--------------------------------|------------------------------|--------|-------|
| <b>Re-Phe</b>                         |                                |                                |                              |        |       |
| C23—H23 $\cdots$ Cg(8) <sup>#1</sup>  | 2.98                           | 3.817(10)                      | 148                          | 2.57   | 30.42 |
| <b>Mono-Re-Phe</b>                    |                                |                                |                              |        |       |
| C7—H7 $\cdots$ Cg(4) <sup>#1</sup>    | 2.96                           | 3.817(3)                       | 150                          | -2.62  | 27.80 |
| <b>Bi-Re-meta-Phe</b>                 |                                |                                |                              |        |       |
| C7—H7 $\cdots$ Cg(4) <sup>#1</sup>    | 2.93                           | 3.791(10)                      | 151                          | -2.61  | 26.99 |
| C7—H7 $\cdots$ Cg(4) <sup>#2</sup>    | 2.93                           | 3.791(10)                      | 151                          | 2.61   | 26.99 |
| C18—H18A $\cdots$ Cg(3) <sup>#3</sup> | 2.91                           | 3.86(5)                        | 162                          | 2.65   | 24.37 |

Cg(i) = center of gravity of ring i; X $\cdots$ Cg = distance of X to Cg; X—H $\cdots$ Cg = X—H—Cg angle; H—Perp = perpendicular distance of H to ring plane J;  $\gamma$  = angle between Cg—H vector and ring J normal.

For complex **Re-Phe**, Cg8 is the centroid of the ring (C27–C32).

For complex **Mono-Re-Phe**, Cg4 is the centroid of the ring (C11–C16).

For complex **Bi-Re-meta-Phe**, Cg3 and Cg4 are the centroids of the rings (N1/C4–C8) and (C11/C12/C13/C12\_a/C11\_a/C14), respectively.

Symmetry codes: #1: x, y, z; #2: 1-x, y, 1/2-z; #3: 1-x, 2-y, 1-z.

**Table S7.** Geometrical parameters ( $\text{\AA}$ ,  $^\circ$ ) for  $\pi\cdots\pi$  interactions detected in structure of **Re-Phe**.

| Cg(i) $\cdots$ Cg(j)               | Cg $\cdots$ Cg [ $\text{\AA}$ ] | $\alpha$ [ $^\circ$ ] | $\beta$ [ $^\circ$ ] | $\gamma$ [ $^\circ$ ] | Cg(i)_Perp | Cg(j)_Perp | Slippage |
|------------------------------------|---------------------------------|-----------------------|----------------------|-----------------------|------------|------------|----------|
| Cg(7) $\cdots$ Cg(7) <sup>#1</sup> | 3.871(5)                        | 0.0(4)                | 29.0                 | 29.0                  | 3.385(4)   | 3.385(4)   | 1.877    |

Cg(i) = plane number i;  $\alpha$  = dihedral angle between planes i and j;  $\beta$  = angle Cg(i) $\rightarrow$ Cg(j) or Cg(i) $\rightarrow$ Me vector and normal to plane i;  $\gamma$  = angle Cg(i) $\rightarrow$ Cg(j) vector and normal to plane j; Cg—Cg = distance between ring centroids; Cg(i)\_Perp = perpendicular distance of Cg(i) on ring j; Cg(j)\_Perp = perpendicular distance of Cg(j) on ring i; Slippage = distance between Cg(i) and perpendicular projection of Cg(j) on ring i.

Cg7 is the centroid of the ring (N5/C20–C24).

Symmetry code: #1: 2-x, 2-y, -z;

### Comment S2. Hirshfeld surfaces (HS) analysis of **Re-Phe**, **Mono-Re-Phe** and **Bi-Re-metaPhe**

HS of **Re-Phe** showed a surface having an area of 360.35  $\text{\AA}^2$ , which is spread over volume of 414.76  $\text{\AA}^3$ . The surface is generated between -0.1882 a.u. (red spot) and 1.6948 a.u. (blue colour) (cf. Fig. 4a). The shape index plot is generated from -1.0000 to 1.0000 a.u. (cf. Fig. 4d). 2D Fingerprint plots (FP) of HS for **Re-Phe** with relative contributions of different interactions are shown in Fig. S32. The presence of the short contacts C—H<sub>(trz)</sub> $\cdots$ O<sub>(CO)</sub>, C—H<sub>(py)</sub> $\cdots$ O<sub>(CO)</sub>, C—H<sub>(trz)</sub> $\cdots$ Cl and C—H<sub>(py)</sub> $\cdots$ Cl and [O $\cdots$ H/H $\cdots$ O = 30.7%, Cl $\cdots$ H/H $\cdots$ Cl = 12.3%] between the neighboring molecules are detected in the 2D FP of **Re-Phe**. These interactions are viewed on the  $d_{\text{norm}}$  surface by light and bright red spots, respectively (cf. Fig. 4a). In addition,  $\pi_{\text{(py)}}\cdots\pi_{\text{(py)}}$  stacking interactions [C $\cdots$ C = 3.9%, C $\cdots$ N/N $\cdots$ C = 1.6%], C—H<sub>(py)</sub> $\cdots\pi_{\text{(Ph)}}$  [C $\cdots$ H/H $\cdots$ C = 14.6%, N $\cdots$ H/H $\cdots$ N = 7.8%] and various other interactions [H $\cdots$ H = 14.7%, C $\cdots$ O/O $\cdots$ C = 5.7%] stabilizing the structure of **Re-Phe** are also found in the 2D FP.

For **Mono-Re-Phe**, the HS analysis reveals that the surface covers an area of 544.58  $\text{\AA}^2$  and the volume is 501.67  $\text{\AA}^3$ . The colour scale on the HS ranges from -1.8444 a.u. (red spot) and 1.2872 a.u. (blue colour) (cf. Fig. 4b). 2D FP of Hirshfeld surface with relative contributions of different interactions are shown in Fig. S33. Weak intermolecular interactions C—H<sub>(Ph)</sub> $\cdots$ O<sub>(CO)</sub> and C—H<sub>(py)</sub> $\cdots$ Cl [O $\cdots$ H/H $\cdots$ O = 17.2%, Cl $\cdots$ H/H $\cdots$ Cl = 4.4%], through which the adjacent molecules interact, are detected in 2D FP. **Mono-Re-Phe** is further stabilized by C—H<sub>(py)</sub> $\cdots\pi_{\text{(Ph)}}$  [C $\cdots$ H/H $\cdots$ C = 13.2%, N $\cdots$ H/H $\cdots$ N = 1.8%] and various other interactions [H $\cdots$ H = 51.8%, C $\cdots$ O/O $\cdots$ C = 1.8%].

In **Bi-Re-metaPhe**, the HS spreads over an area of 914.71  $\text{\AA}^2$  and volume of 944.84  $\text{\AA}^3$ . The colour scale on the HS ranges from -1.8116 a.u. (red spot) and 1.2967 a.u. (blue colour) (cf. Fig. 4c). 2D FP with relative contributions of different interactions are shown in Fig. S34. Weak intermolecular interactions C—H<sub>(octyl)</sub> $\cdots$ O<sub>(CO)</sub>, C—H<sub>(DCM)</sub> $\cdots$ O<sub>(CO)</sub> and C—H<sub>(octyl)</sub> $\cdots$ Cl<sub>(DCM)</sub> [O $\cdots$ H/H $\cdots$ O = 20.5%, Cl $\cdots$ H/H $\cdots$ Cl = 11.1%], which are linking the adjacent molecules, are found in 2D FP. **Bi-Re-metaPhe** is further stabilized by C—H<sub>(py)</sub> $\cdots\pi_{\text{(m-Xyl)}}$ , C—H<sub>(octyl)</sub> $\cdots\pi_{\text{(py)}}$  [C $\cdots$ H/H $\cdots$ C = 12.7%, N $\cdots$ H/H $\cdots$ N = 6.9%] and various other interactions [H $\cdots$ H = 40.7%, C $\cdots$ C = 4.3%, C $\cdots$ O/O $\cdots$ C = 2.7%].

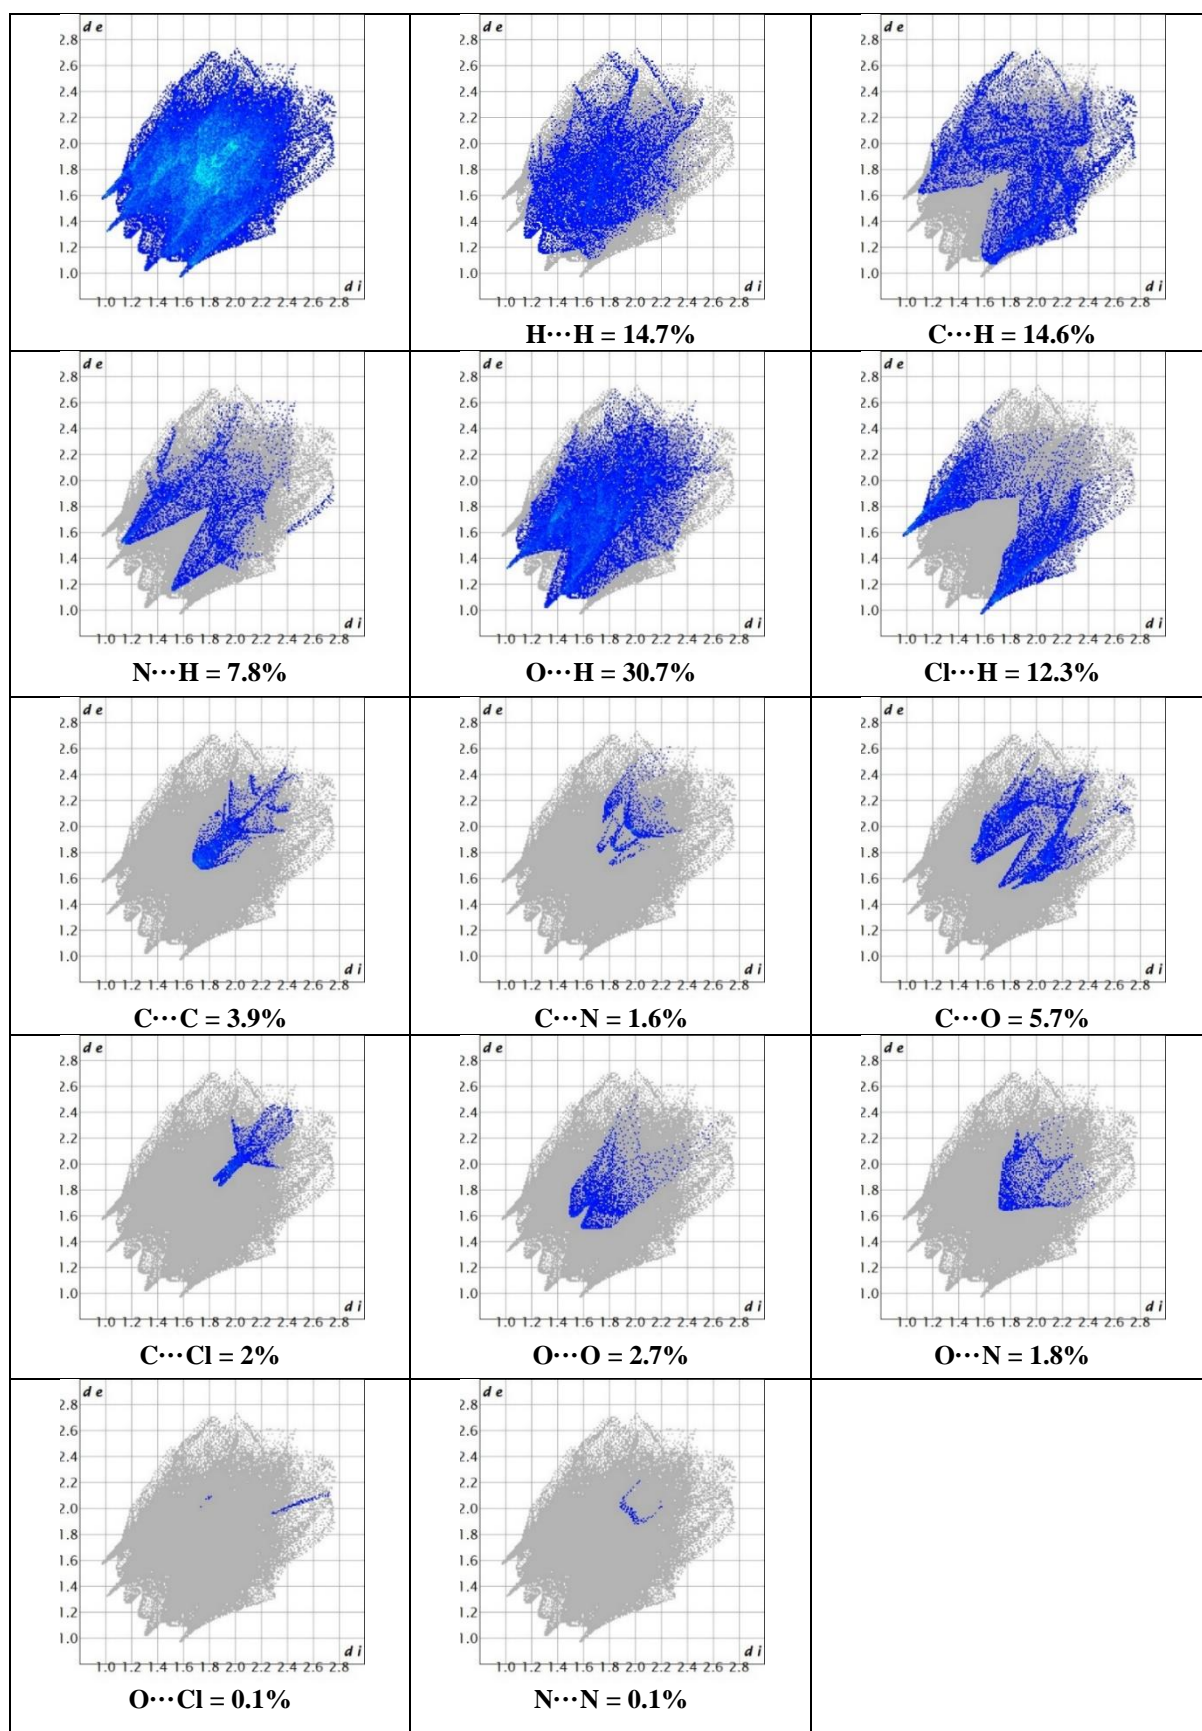

**Figure S32.** Two-dimensional fingerprint plots for overall interactions and individual interactions in crystal packing of **Re-Phe**.

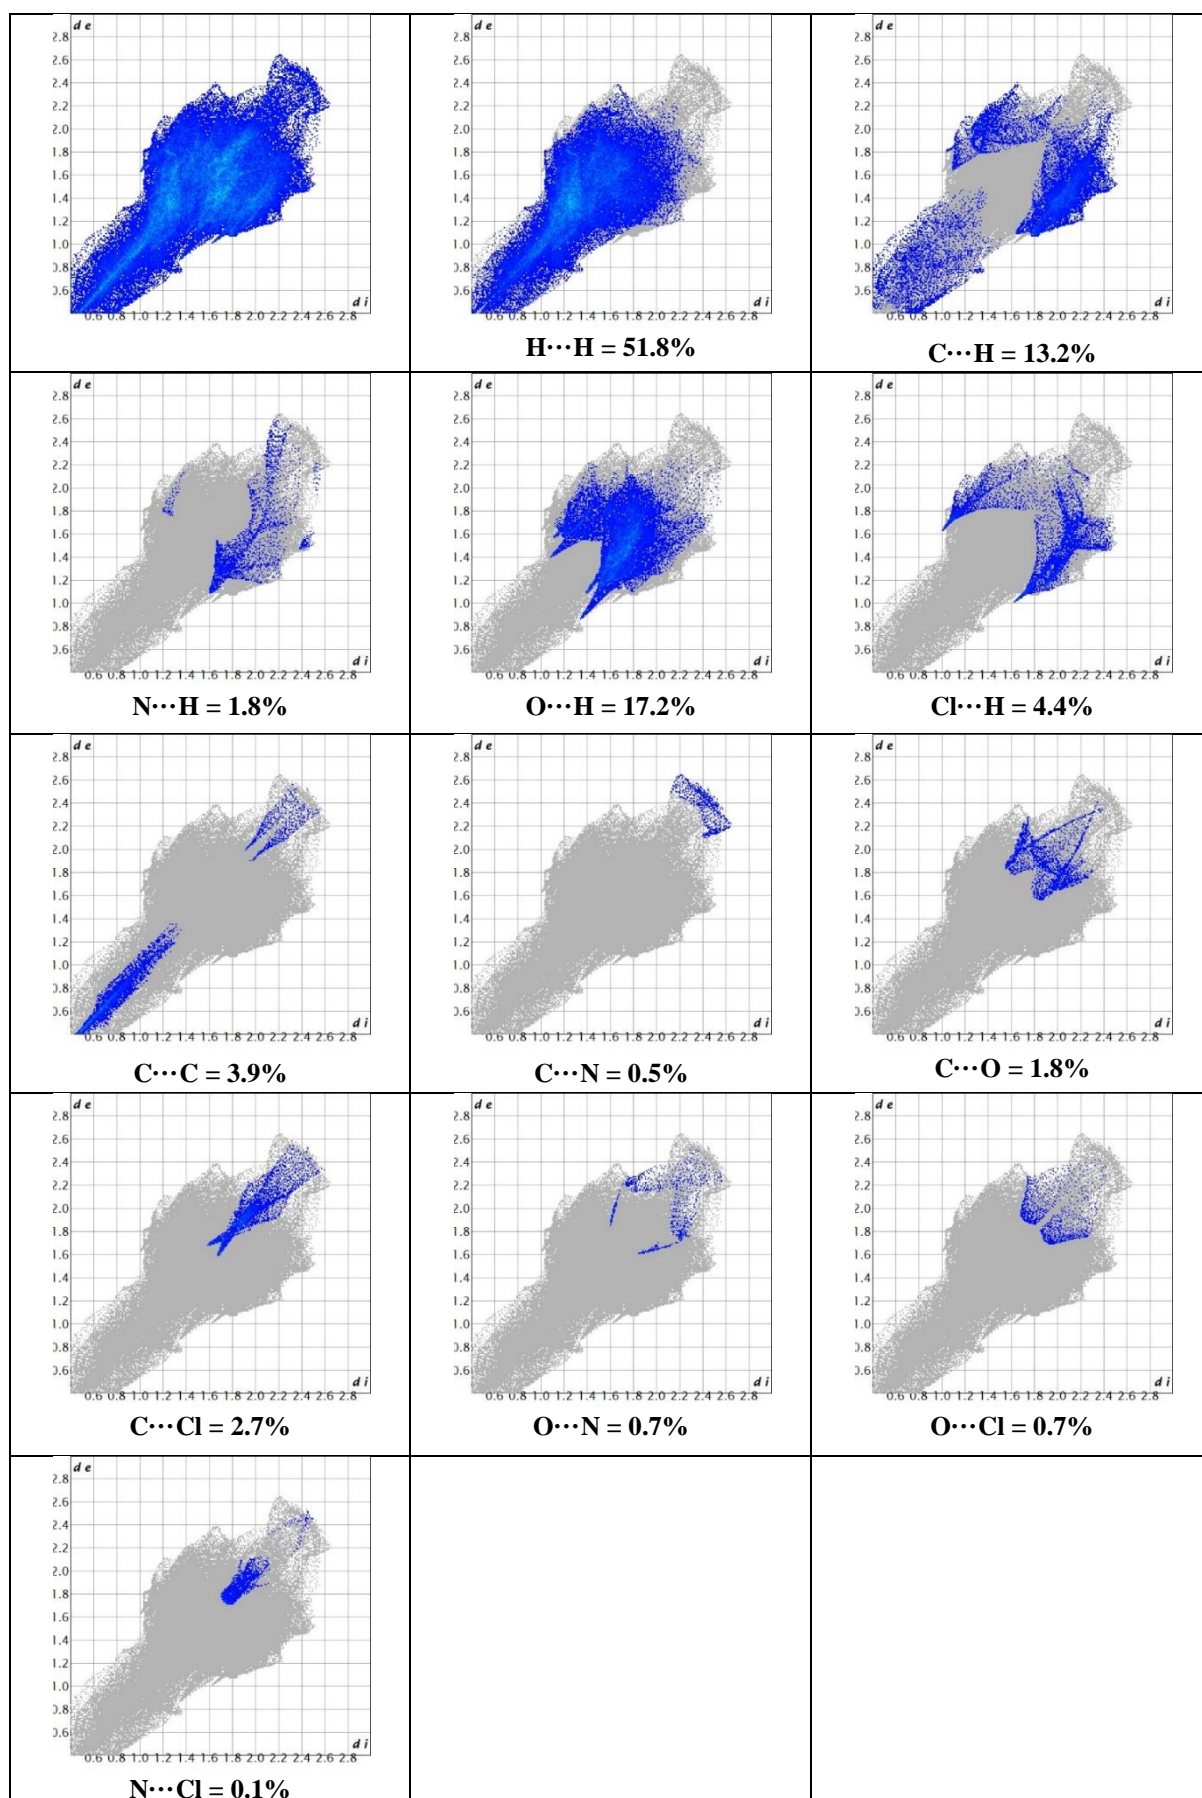

**Figure S33.** Two-dimensional fingerprint plots for overall interactions and individual interactions in crystal packing of **Mono-Re-Phe**.

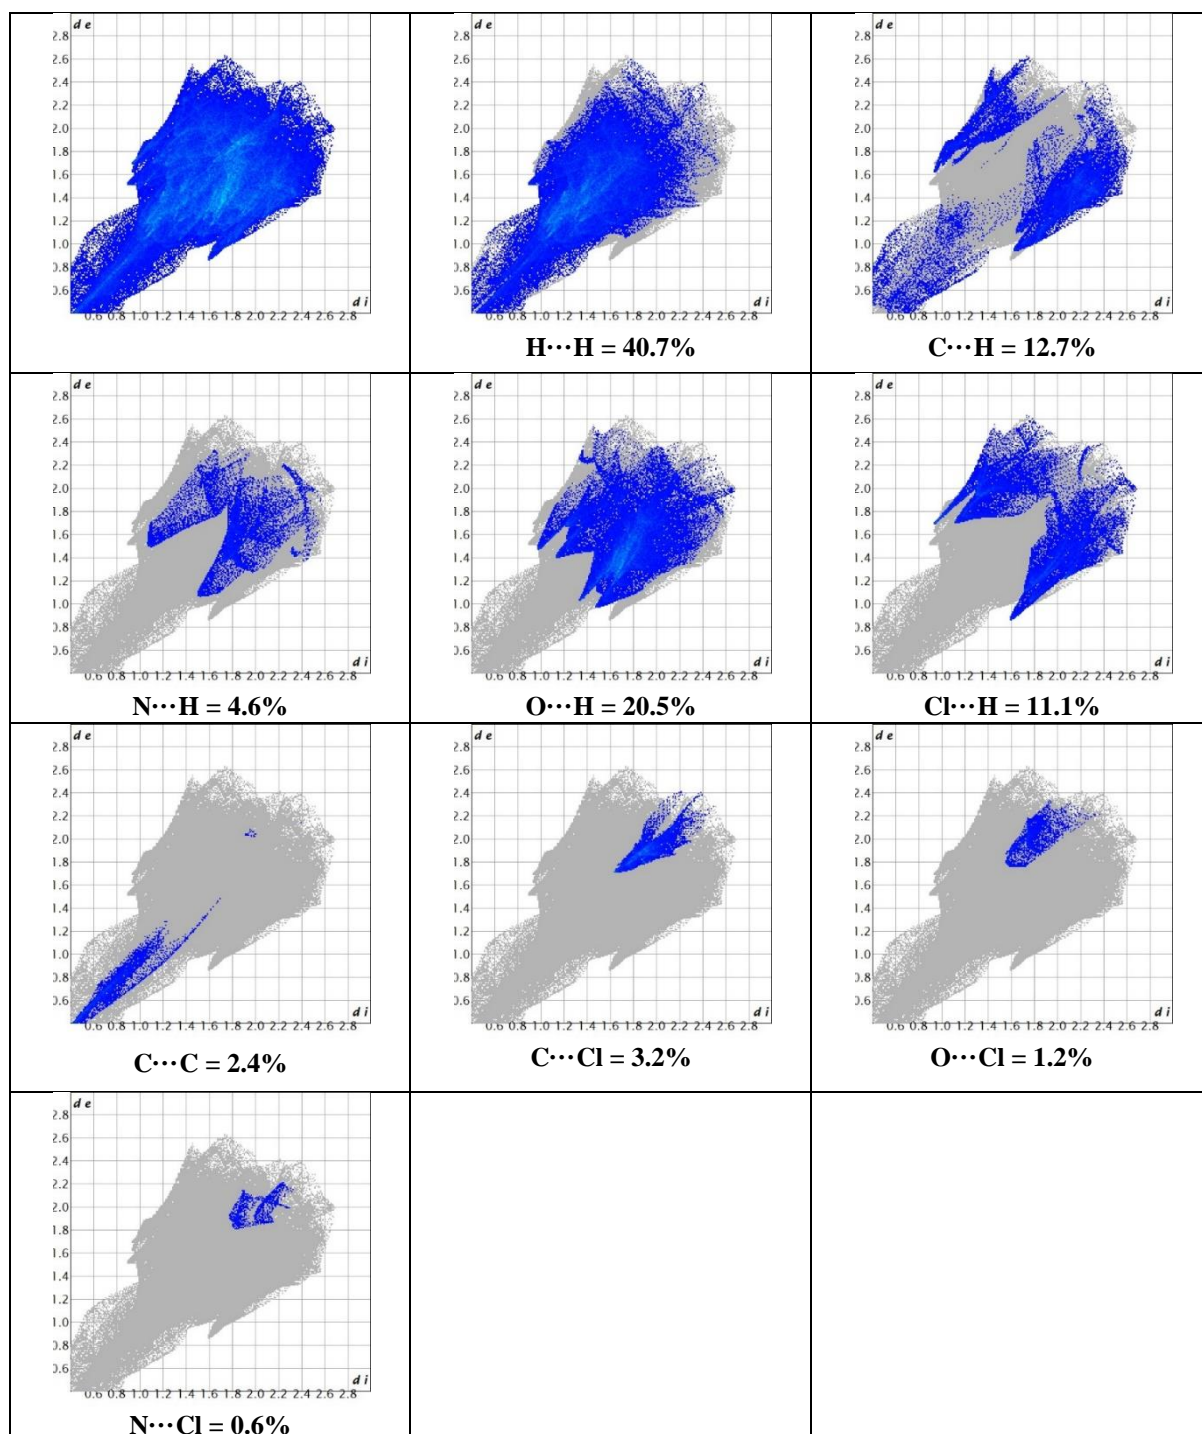

**Figure S34.** Two-dimensional fingerprint plots for overall interactions and individual interactions in crystal packing of *Bi-Re-metaPhe*.

## Calculations

**Table S8.** Selected calculated bond lengths [ $\text{\AA}$ ] and angles [ $^\circ$ ] in the ground ( $S_0$ ) first singlet excited ( $S_1$ ) and first triplet excited ( $T_1$ ) states for **Re-Phe**, together with the experimental data.

| Bond lengths | Exp.      | Optimized |       |       | Bond angles | Exp.      | Optimized |        |        |
|--------------|-----------|-----------|-------|-------|-------------|-----------|-----------|--------|--------|
|              |           | $S_0$     | $S_1$ | $T_1$ |             |           | $S_0$     | $S_1$  | $T_1$  |
| Re1-C1       | 1.935(10) | 1.915     | 1.956 | 1.984 | C2-Re1-C1   | 90.1(4)   | 89.33     | 84.78  | 87.53  |
| Re1-C2       | 1.902(11) | 1.911     | 1.947 | 1.934 | C2-Re1-C3   | 89.0(4)   | 89.84     | 93.01  | 92.64  |
| Re1-C3       | 1.869(10) | 1.896     | 1.954 | 1.953 | C1-Re1-C3   | 89.5(4)   | 90.02     | 89.90  | 88.43  |
| Re1-N1       | 2.200(7)  | 2.214     | 2.157 | 2.166 | C2-Re1-N1   | 171.9(3)  | 171.15    | 174.35 | 172.25 |
| Re1-N2       | 2.147(7)  | 2.152     | 2.105 | 2.054 | C1-Re1-N1   | 97.7(3)   | 98.74     | 100.71 | 99.65  |
| Re1-C11      | 2.474(2)  | 2.511     | 2.401 | 2.429 | C3-Re1-N1   | 93.0(3)   | 93.77     | 88.38  | 90.51  |
|              |           |           |       |       | C2-Re1-N2   | 98.1(3)   | 97.98     | 98.65  | 96.71  |
| C1-O1        | 1.140(11) | 1.152     | 1.143 | 1.140 | C1-Re1-N2   | 169.5(3)  | 171.65    | 176.55 | 175.53 |
| C2-O2        | 1.171(11) | 1.151     | 1.143 | 1.145 | C3-Re1-N2   | 97.2(3)   | 94.03     | 90.25  | 92.64  |
| C3-O3        | 1.182(10) | 1.156     | 1.140 | 1.141 | N1-Re1-N2   | 73.9(3)   | 73.72     | 75.85  | 76.20  |
|              |           |           |       |       | C2-Re1-C11  | 94.5(3)   | 92.75     | 92.13  | 91.99  |
|              |           |           |       |       | C1-Re1-C11  | 90.7(3)   | 91.71     | 91.01  | 88.03  |
|              |           |           |       |       | C3-Re1-C11  | 176.5(3)  | 176.90    | 174.84 | 174.04 |
|              |           |           |       |       | N1-Re1-C11  | 83.53(19) | 83.43     | 86.46  | 85.37  |
|              |           |           |       |       | N2-Re1-C11  | 82.09(18) | 83.94     | 88.54  | 93.23  |
|              |           |           |       |       | O1-C1-Re1   | 178.3(9)  | 179.48    | 178.45 | 178.61 |
|              |           |           |       |       | O2-C2-Re1   | 177.5(9)  | 178.92    | 179.60 | 179.16 |
|              |           |           |       |       | O3-C3-Re1   | 177.1(8)  | 179.51    | 179.29 | 179.31 |

**Table S9.** Selected calculated bond lengths [ $\text{\AA}$ ] and angles [ $^\circ$ ] in the ground ( $S_0$ ) first singlet excited ( $S_1$ ) and first triplet excited ( $T_1$ ) states for complex **Mono-Re-Phe**, together with the experimental data.

| Bond lengths | Exp.       | Optimized |       |       | Bond angles | Exp.      | Optimized |        |        |
|--------------|------------|-----------|-------|-------|-------------|-----------|-----------|--------|--------|
|              |            | $S_0$     | $S_1$ | $T_1$ |             |           | $S_0$     | $S_1$  | $T_1$  |
| Re1-C1       | 1.904(2)   | 1.895     | 1.953 | 1.948 | C2-Re1-C1   | 90.34(10) | 89.84     | 93.03  | 91.99  |
| Re1-C2       | 1.913(2)   | 1.911     | 1.946 | 1.931 | C2-Re1-C3   | 87.92(10) | 89.38     | 84.89  | 88.27  |
| Re1-C3       | 1.912(2)   | 1.915     | 1.958 | 1.984 | C1-Re1-C3   | 87.66(10) | 90.01     | 89.85  | 88.65  |
| Re1-N1       | 2.1974(17) | 2.214     | 2.154 | 2.167 | C2-Re1-N1   | 171.22(8) | 171.09    | 174.29 | 172.05 |
| Re1-N2       | 2.1411(16) | 2.150     | 2.101 | 2.047 | C1-Re1-N1   | 91.22(8)  | 93.79     | 88.50  | 91.46  |
| Re1-Cl1      | 2.4747(6)  | 2.512     | 2.406 | 2.441 | C3-Re1-N1   | 100.78(8) | 98.75     | 100.63 | 98.97  |
|              |            |           |       |       | C2-Re1-N2   | 97.23(8)  | 97.95     | 98.54  | 96.49  |
| C1-O1        | 1.149(3)   | 1.156     | 1.140 | 1.142 | C1-Re1-N2   | 96.75(8)  | 93.95     | 90.10  | 90.01  |
| C2-O2        | 1.148(3)   | 1.151     | 1.143 | 1.146 | C3-Re1-N2   | 173.18(8) | 171.68    | 176.58 | 175.10 |
| C3-O3        | 1.154(3)   | 1.152     | 1.143 | 1.141 | N1-Re1-N2   | 74.01(6)  | 73.70     | 75.95  | 76.35  |
|              |            |           |       |       | C2-Re1-Cl1  | 94.92(7)  | 92.68     | 91.99  | 91.74  |
|              |            |           |       |       | C1-Re1-Cl1  | 174.68(7) | 176.98    | 174.97 | 174.67 |
|              |            |           |       |       | C3-Re1-Cl1  | 91.76(7)  | 91.69     | 90.95  | 87.67  |
|              |            |           |       |       | N1-Re1-Cl1  | 83.69(5)  | 83.49     | 86.47  | 85.32  |
|              |            |           |       |       | N2-Re1-Cl1  | 83.37(5)  | 84.05     | 88.81  | 93.35  |
|              |            |           |       |       | O1-C1-Re1   | 175.7(2)  | 179.52    | 179.31 | 179.44 |
|              |            |           |       |       | O2-C2-Re1   | 179.0(2)  | 178.89    | 179.64 | 179.09 |
|              |            |           |       |       | O3-C3-Re1   | 177.7(2)  | 179.49    | 178.34 | 178.72 |

**Table S10.** Selected calculated bond lengths [ $\text{\AA}$ ] and angles [ $^\circ$ ] in the ground ( $S_0$ ) first singlet excited ( $S_1$ ) and first triplet excited ( $T_1$ ) states for complex **Bi-Re-metaPhe**, together with the experimental data.

| Bond lengths | Exp.      | Optimized |       |       | Bond angles | Exp.      | Optimized |        |        |
|--------------|-----------|-----------|-------|-------|-------------|-----------|-----------|--------|--------|
|              |           | $S_0$     | $S_1$ | $T_1$ |             |           | $S_0$     | $S_1$  | $T_1$  |
| Re1-C1       | 1.923(13) | 1.896     | 1.896 | 1.896 | C2-Re1-C1   | 90.4(5)   | 89.83     | 89.84  | 89.83  |
| Re1-C2       | 1.912(12) | 1.911     | 1.911 | 1.911 | C2-Re1-C3   | 90.0(5)   | 89.31     | 89.32  | 89.32  |
| Re1-C3       | 1.898(10) | 1.915     | 1.915 | 1.915 | C1-Re1-C3   | 89.0(5)   | 89.96     | 89.96  | 89.96  |
| Re1-N1       | 2.205(8)  | 2.214     | 2.214 | 2.214 | C2-Re1-N1   | 170.5(4)  | 171.00    | 171.00 | 171.00 |
| Re1-N2       | 2.154(7)  | 2.150     | 2.150 | 2.150 | C1-Re1-N1   | 95.2(5)   | 93.89     | 93.89  | 93.89  |
| Re1-Cl1      | 2.472(3)  | 2.511     | 2.511 | 2.511 | C3-Re1-N1   | 97.8(4)   | 98.87     | 98.85  | 98.86  |
|              |           |           |       |       | C2-Re1-N2   | 97.7(4)   | 97.93     | 97.93  | 97.93  |
| C1-O1        | 1.089(15) | 1.156     | 1.156 | 1.156 | C1-Re1-N2   | 94.4(4)   | 93.83     | 93.78  | 93.80  |
| C2-O2        | 1.134(14) | 1.151     | 1.151 | 1.151 | C3-Re1-N2   | 171.6(4)  | 171.82    | 171.84 | 171.83 |
| C3-O3        | 1.163(13) | 1.152     | 1.152 | 1.152 | N1-Re1-N2   | 74.2(3)   | 73.66     | 73.68  | 73.68  |
|              |           |           |       |       | C2-Re1-Cl1  | 91.0(3)   | 92.74     | 92.73  | 92.73  |
|              |           |           |       |       | C1-Re1-Cl1  | 177.8(4)  | 176.91    | 176.92 | 176.93 |
|              |           |           |       |       | C3-Re1-Cl1  | 92.7(4)   | 91.79     | 91.76  | 91.76  |
|              |           |           |       |       | N1-Re1-Cl1  | 83.2(2)   | 83.32     | 83.33  | 83.33  |
|              |           |           |       |       | N2-Re1-Cl1  | 83.8(2)   | 84.11     | 84.19  | 84.17  |
|              |           |           |       |       | O1-C1-Re1   | 176.4(13) | 179.55    | 179.54 | 179.54 |
|              |           |           |       |       | O2-C2-Re1   | 177.2(10) | 178.86    | 178.87 | 178.87 |
|              |           |           |       |       | O3-C3-Re1   | 178.9(13) | 179.55    | 179.55 | 179.54 |

**Table S11.** Selected calculated bond lengths [ $\text{\AA}$ ] and angles [ $^\circ$ ] in the ground ( $S_0$ ) first singlet excited ( $S_1$ ) and first triplet excited ( $T_1$ ) states for complex **Bi-Re-*para*Phe**.

| Bond lengths | Optimized |       |       | Bond angles | Optimized |        |        |
|--------------|-----------|-------|-------|-------------|-----------|--------|--------|
|              | $S_0$     | $S_1$ | $T_1$ |             | $S_0$     | $S_1$  | $T_1$  |
| Re1-C37      | 1.896     | 1.896 | 1.896 | C38-Re1-C37 | 89.83     | 89.83  | 89.82  |
| Re1-C38      | 1.911     | 1.911 | 1.911 | C38-Re1-C39 | 89.34     | 89.34  | 89.33  |
| Re1-C39      | 1.915     | 1.915 | 1.915 | C37-Re1-C39 | 90.03     | 90.02  | 90.01  |
| Re1-N1       | 2.214     | 2.214 | 2.214 | C38-Re1-N1  | 171.05    | 171.06 | 171.06 |
| Re1-N2       | 2.150     | 2.150 | 2.150 | C37-Re1-N1  | 93.75     | 93.75  | 93.73  |
| Re1-Cl1      | 2.512     | 2.512 | 2.512 | C39-Re1-N1  | 98.85     | 98.84  | 98.86  |
|              |           |       |       | C38-Re1-N2  | 97.92     | 97.92  | 97.91  |
| C37-O37      | 1.156     | 1.156 | 1.156 | C37-Re1-N2  | 94.06     | 94.05  | 93.99  |
| C38-O38      | 1.151     | 1.151 | 1.151 | C39-Re1-N2  | 171.67    | 171.67 | 171.73 |
| C39-O39      | 1.152     | 1.152 | 1.152 | N1-Re1-N2   | 73.66     | 73.67  | 73.68  |
|              |           |       |       | C38-Re1-Cl1 | 92.69     | 92.69  | 92.77  |
|              |           |       |       | C37-Re1-Cl1 | 176.96    | 176.97 | 176.89 |
|              |           |       |       | C39-Re1-Cl1 | 91.69     | 91.67  | 91.74  |
|              |           |       |       | N1-Re1-Cl1  | 83.51     | 83.51  | 83.46  |
|              |           |       |       | N2-Re1-Cl1  | 83.93     | 83.96  | 83.95  |
|              |           |       |       | O37-C37-Re1 | 179.54    | 179.53 | 179.55 |
|              |           |       |       | O38-C38-Re1 | 178.85    | 178.86 | 178.87 |
|              |           |       |       | O39-C39-Re1 | 179.52    | 179.53 | 179.54 |



**Table S12.** Torsion angle value between pyta and R calculated using the density functional theory (DFT) method at the PBE1PBE/LANL2DZ level for the ground state ( $S_0$ ), first singlet excited ( $S_1$ ) and first triplet excited state ( $T_1$ ) of **Re-Phe**, **Mono-Re-Phe**, **Bi-Re-metaPhe** and **Bi-Re-paraPhe**, and obtained from crystallographic data.

| Complex              | Bond angle [°]        | SXRD   | $S_0$   | $S_1$   | $T_1$   |
|----------------------|-----------------------|--------|---------|---------|---------|
| <b>Re-Phe</b>        | C(9)–N(4)–C(11)–C(12) | -70.19 | -86.492 | -67.652 | -60.178 |
| <b>Mono-Re-Phe</b>   |                       | -94.96 | -92.478 | -93.866 | -93.472 |
| <b>Bi-Re-metaPhe</b> |                       | -99.09 | -91.332 | -89.813 | -90.661 |
| <b>Bi-Re-paraPhe</b> |                       | –      | -93.631 | -95.975 | -92.532 |

**Table S13.** The frontier molecular orbital compositions (%) and energy levels for **Re-Phe** (in dichloromethane).

| Orbital                     |      | Energy (eV) | MO Contribution (%) |    |    |      |    | Main bond type                 |
|-----------------------------|------|-------------|---------------------|----|----|------|----|--------------------------------|
|                             |      |             | Re                  | CO | Cl | pyta | R  |                                |
| 96                          | L+5  | -0.63       | 38                  | 56 | -2 | 1    | 8  | p(Re)+ $\pi^*$ (CO)            |
| 95                          | L+4  | -0.76       | 31                  | 65 | 0  | 6    | 0  | p(Re)+ $\pi^*$ (CO)            |
| 94                          | L+3  | -1.01       | 0                   | 1  | 0  | 13   | 87 | $\pi^*$ (R)                    |
| 93                          | L+2  | -1.15       | 0                   | 1  | 0  | 3    | 96 | $\pi^*$ (R)                    |
| 92                          | L+1  | -1.65       | 0                   | 1  | 0  | 94   | 5  | $\pi^*$ (pyta)                 |
| 91                          | L    | -2.51       | 2                   | 4  | 0  | 92   | 2  | $\pi^*$ (pyta)                 |
| HOMO–LUMO gap (E = 4.01 eV) |      |             |                     |    |    |      |    |                                |
| 90                          | H    | -6.52       | 50                  | 25 | 21 | 4    | 0  | d(Re)+ $\pi$ (CO)/ $\pi$ (Cl)  |
| 89                          | H-1  | -6.63       | 49                  | 23 | 23 | 5    | 0  | d(Re)+ $\pi$ (CO)/ $\pi$ (Cl)  |
| 88                          | H-2  | -7.11       | 67                  | 31 | 1  | 1    | 0  | d(Re)+ $\pi$ (CO)              |
| 87                          | H-3  | -7.79       | 2                   | 1  | 32 | 66   | 0  | $\pi$ (pyta)/ $\pi$ (Cl)       |
| 86                          | H-4  | -8.07       | 1                   | 0  | 5  | 6    | 88 | $\pi$ (R)                      |
| 85                          | H-5  | -8.09       | 2                   | 1  | 8  | 11   | 78 | $\pi$ (R)                      |
| 84                          | H-6  | -8.10       | 13                  | 4  | 58 | 11   | 14 | $\pi$ (Cl)/d(Re)               |
| 83                          | H-7  | -8.26       | 12                  | 4  | 39 | 34   | 11 | $\pi$ (Cl)/ $\pi$ (pyta)/d(Re) |
| 82                          | H-8  | -8.78       | 7                   | 15 | 72 | 6    | 0  | $\pi$ (Cl)/ $\pi$ (CO)         |
| 81                          | H-9  | -9.33       | 0                   | 4  | 0  | 89   | 7  | $\pi$ (pyta)                   |
| 80                          | H-10 | -9.46       | 4                   | 2  | 4  | 88   | 2  | $\pi$ (pyta)                   |

R = -C<sub>6</sub>H<sub>5</sub>

**Table S14.** The frontier molecular orbital compositions (%) and energy levels for **Mono-Re-Phe** (in dichloromethane).

| Orbital                     |      | Energy (eV) | MO Contribution (%) |    |    |      |                | Main bond type |                                |
|-----------------------------|------|-------------|---------------------|----|----|------|----------------|----------------|--------------------------------|
|                             |      |             | Re                  | CO | Cl | pyta | R <sub>a</sub> |                |                                |
| 128                         | L+5  | -0.58       | 41                  | 57 | -2 | 0    | 4              | 1              | p(Re)+ $\pi^*$ (CO)            |
| 127                         | L+4  | -0.73       | 33                  | 64 | 0  | 7    | -1             | 0              | p(Re)+ $\pi^*$ (CO)            |
| 126                         | L+3  | -0.95       | 0                   | 0  | 0  | 6    | 94             | 0              | $\pi^*$ (R <sub>a</sub> )      |
| 125                         | L+2  | -1.14       | 0                   | 1  | 0  | 6    | 96             | -2             | $\pi^*$ (R <sub>a</sub> )      |
| 124                         | L+1  | -1.59       | 0                   | 1  | 0  | 95   | 4              | 0              | $\pi^*$ (pyta)                 |
| 123                         | L    | -2.45       | 2                   | 5  | 0  | 90   | 2              | 0              | $\pi^*$ (pyta)                 |
| HOMO–LUMO gap (E = 4.03 eV) |      |             |                     |    |    |      |                |                |                                |
| 122                         | H    | -6.48       | 49                  | 25 | 19 | 6    | 0              | 0              | d(Re)+ $\pi$ (CO)/ $\pi$ (Cl)  |
| 121                         | H-1  | -6.60       | 49                  | 23 | 23 | 5    | 0              | 0              | d(Re)+ $\pi$ (CO)/ $\pi$ (Cl)  |
| 120                         | H-2  | -7.07       | 68                  | 31 | 1  | 0    | 0              | 0              | d(Re)+ $\pi$ (CO)              |
| 119                         | H-3  | -7.60       | 0                   | 0  | 24 | 71   | 0              | 4              | $\pi$ (pyta)/ $\pi$ (Cl)       |
| 118                         | H-4  | -8.03       | 2                   | 1  | 7  | 9    | 81             | 0              | $\pi$ (R <sub>a</sub> )        |
| 117                         | H-5  | -8.06       | 1                   | 0  | 4  | 7    | 88             | 0              | $\pi$ (R <sub>a</sub> )        |
| 116                         | H-6  | -8.07       | 13                  | 4  | 62 | 12   | 9              | 0              | $\pi$ (Cl)/d(Re)               |
| 115                         | H-7  | -8.20       | 12                  | 4  | 44 | 28   | 12             | 0              | $\pi$ (Cl)/ $\pi$ (pyta)/d(Re) |
| 114                         | H-8  | -8.62       | 0                   | 0  | 0  | 3    | 0              | 97             | $\sigma$ (R <sub>b</sub> )     |
| 113                         | H-9  | -8.75       | 7                   | 15 | 69 | 6    | 0              | 4              | $\pi$ (Cl)/ $\pi$ (CO)/d(Re)   |
| 112                         | H-10 | -8.78       | 0                   | 1  | 3  | 1    | 0              | 96             | $\sigma$ (R <sub>b</sub> )     |

R<sub>a</sub> = -C<sub>6</sub>H<sub>5</sub>; R<sub>b</sub> = octyl chain

**Table S15.** The frontier molecular orbital compositions (%) and energy levels for **Bi-Re-*meta*Phe** (in dichloromethane).

| Orbital                     |      | Energy (eV) | MO Contribution (%) |    |    |      |                |                | Main bond type               |
|-----------------------------|------|-------------|---------------------|----|----|------|----------------|----------------|------------------------------|
|                             |      |             | Re                  | CO | Cl | pyta | R <sub>a</sub> | R <sub>b</sub> |                              |
| 233                         | L+9  | -0.64       | 39                  | 58 | -1 | 3    | 3              | 0              | p(Re)+π*(CO)                 |
| 232                         | L+8  | -0.64       | 41                  | 57 | -2 | 1    | 4              | 0              | p(Re)+π*(CO)                 |
| 231                         | L+7  | -0.79       | 34                  | 64 | 0  | 6    | 0              | -1             | p(Re)+π*(CO)                 |
| 230                         | L+6  | -0.80       | 33                  | 63 | 0  | 8    | -3             | 1              | p(Re)+π*(CO)                 |
| 229                         | L+5  | -1.52       | 0                   | 1  | 0  | 50   | 48             | 0              | π*(pyta)/π*(R <sub>a</sub> ) |
| 228                         | L+4  | -1.62       | 0                   | 1  | 0  | 71   | 28             | 0              | π*(pyta)/π*(R <sub>a</sub> ) |
| 227                         | L+3  | -1.79       | 0                   | 0  | 0  | 52   | 50             | -1             | π*(pyta)/π*(R <sub>a</sub> ) |
| 226                         | L+2  | -1.84       | 0                   | 0  | 0  | 34   | 66             | 0              | π*(pyta)/π*(R <sub>a</sub> ) |
| 225                         | L+1  | -2.56       | 2                   | 5  | 0  | 90   | 3              | 0              | π*(pyta)                     |
| 224                         | L    | -2.58       | 2                   | 4  | 0  | 91   | 1              | 1              | π*(pyta)                     |
| HOMO–LUMO gap (E = 3.96 eV) |      |             |                     |    |    |      |                |                |                              |
| 223                         | H    | -6.54       | 49                  | 25 | 20 | 7    | 0              | 0              | d(Re)+π(CO)/π(Cl)            |
| 222                         | H-1  | -6.55       | 50                  | 25 | 20 | 6    | 0              | 0              | d(Re)+π(CO)/π(Cl)            |
| 221                         | H-2  | -6.66       | 49                  | 23 | 23 | 7    | -2             | 0              | d(Re)+π(CO)/π(Cl)            |
| 220                         | H-3  | -6.66       | 49                  | 23 | 23 | 5    | 0              | 0              | d(Re)+π(CO)/π(Cl)            |
| 219                         | H-4  | -7.14       | 68                  | 31 | 1  | 1    | 0              | 0              | d(Re)+π(CO)                  |
| 218                         | H-5  | -7.14       | 67                  | 31 | 1  | 1    | 0              | 0              | d(Re)+π(CO)                  |
| 217                         | H-6  | -7.72       | 0                   | 0  | 27 | 69   | 0              | 4              | π(pyta)/π(Cl)                |
| 216                         | H-7  | -7.73       | 1                   | 0  | 27 | 69   | 0              | 3              | π(pyta)/π(Cl)                |
| 215                         | H-8  | -8.13       | 14                  | 5  | 68 | 13   | 0              | 0              | π(Cl)/d(Re)                  |
| 214                         | H-9  | -8.13       | 14                  | 5  | 68 | 13   | 0              | 0              | π(Cl)/d(Re)                  |
| 213                         | H-10 | -8.26       | 14                  | 5  | 44 | 34   | 2              | 1              | π(Cl)/π(pyta)/d(Re)          |
| 212                         | H-11 | -8.26       | 14                  | 5  | 46 | 35   | 0              | 1              | π(Cl)/π(pyta)/d(Re)          |
| 211                         | H-12 | -8.57       | 1                   | 1  | 3  | 28   | 63             | 5              | π(R <sub>a</sub> )/π(pyta)   |
| 210                         | H-13 | -8.61       | 0                   | 0  | 0  | 14   | 84             | 1              | π(R <sub>a</sub> )/π(pyta)   |
| 209                         | H-14 | -8.75       | 0                   | 0  | 0  | 1    | 2              | 97             | σ(R <sub>b</sub> )           |
| 208                         | H-15 | -8.75       | 0                   | 0  | 0  | 1    | 2              | 96             | σ(R <sub>b</sub> )           |

R<sub>a</sub> = -C<sub>6</sub>H<sub>4</sub>- (*m*-); R<sub>b</sub> = octyl chain

**Table S16.** The frontier molecular orbital compositions (%) and energy levels for **Bi-Re-*para*Phe** (in dichloromethane).

| Orbital                     |     | Energy (eV) | MO Contribution (%) |    |    |      |                |                | Main bond type               |
|-----------------------------|-----|-------------|---------------------|----|----|------|----------------|----------------|------------------------------|
|                             |     |             | Re                  | CO | Cl | pyta | R <sub>a</sub> | R <sub>b</sub> |                              |
| 233                         | L+9 | -0.64       | 39                  | 58 | -2 | 4    | 1              | 0              | p(Re)+π*(CO)                 |
| 232                         | L+8 | -0.64       | 40                  | 57 | -1 | 2    | 3              | 0              | p(Re)+π*(CO)                 |
| 231                         | L+7 | -0.79       | 33                  | 64 | 0  | 4    | 0              | 0              | p(Re)+π*(CO)                 |
| 230                         | L+6 | -0.80       | 33                  | 63 | 0  | 9    | -5             | 1              | p(Re)+π*(CO)                 |
| 229                         | L+5 | -1.44       | 0                   | 1  | 0  | 36   | 63             | 0              | π*(R <sub>a</sub> )/π*(pyta) |
| 228                         | L+4 | -1.66       | 0                   | 1  | 0  | 98   | 0              | 0              | π*(pyta)                     |
| 227                         | L+3 | -1.78       | 0                   | 0  | 0  | 62   | 37             | 0              | π*(pyta)/π*(R <sub>a</sub> ) |
| 226                         | L+2 | -1.88       | 0                   | 0  | 0  | 12   | 87             | 1              | π*(R <sub>a</sub> )          |
| 225                         | L+1 | -2.56       | 2                   | 4  | 0  | 92   | 1              | 0              | π*(pyta)                     |
| 224                         | L   | -2.57       | 2                   | 4  | 0  | 89   | 3              | 1              | π*(pyta)                     |
| HOMO–LUMO gap (E = 3.98 eV) |     |             |                     |    |    |      |                |                |                              |
| 223                         | H   | -6.55       | 50                  | 25 | 20 | 6    | 0              | 0              | d(Re)+π(CO)/π(Cl)            |
| 222                         | H-1 | -6.55       | 50                  | 25 | 20 | 6    | 0              | 0              | d(Re)+π(CO)/π(Cl)            |
| 221                         | H-2 | -6.66       | 49                  | 23 | 23 | 7    | -1             | 0              | d(Re)+π(CO)/π(Cl)            |
| 220                         | H-3 | -6.66       | 49                  | 23 | 23 | 6    | 0              | 0              | d(Re)+π(CO)/π(Cl)            |
| 219                         | H-4 | -7.14       | 67                  | 31 | 1  | 1    | 0              | 0              | d(Re)+π(CO)                  |
| 218                         | H-5 | -7.14       | 68                  | 31 | 1  | 1    | 0              | 0              | d(Re)+π(CO)                  |

|     |      |       |    |   |    |    |    |    |                                                       |
|-----|------|-------|----|---|----|----|----|----|-------------------------------------------------------|
| 217 | H-6  | -7.72 | 0  | 0 | 27 | 69 | 0  | 4  | $\pi(\text{pyta})/\pi(\text{Cl})$                     |
| 216 | H-7  | -7.72 | 0  | 0 | 27 | 69 | 0  | 3  | $\pi(\text{pyta})/\pi(\text{Cl})$                     |
| 215 | H-8  | -8.13 | 14 | 5 | 68 | 13 | 0  | 0  | $\pi(\text{Cl})/\text{d}(\text{Re})$                  |
| 214 | H-9  | -8.13 | 14 | 5 | 68 | 13 | 0  | 0  | $\pi(\text{Cl})/\text{d}(\text{Re})$                  |
| 213 | H-10 | -8.25 | 13 | 5 | 43 | 35 | 4  | 0  | $\pi(\text{Cl})/\pi(\text{pyta})/\text{d}(\text{Re})$ |
| 212 | H-11 | -8.26 | 14 | 5 | 46 | 35 | 0  | 0  | $\pi(\text{Cl})/\pi(\text{pyta})/\text{d}(\text{Re})$ |
| 211 | H-12 | -8.56 | 1  | 1 | 3  | 33 | 59 | 3  | $\pi(\text{R}_a)/\pi(\text{pyta})$                    |
| 210 | H-13 | -8.65 | 0  | 0 | 1  | 3  | 95 | 1  | $\pi(\text{R}_a)$                                     |
| 209 | H-14 | -8.74 | 0  | 0 | 0  | 1  | 0  | 99 | $\sigma(\text{R}_b)$                                  |
| 208 | H-15 | -8.75 | 0  | 0 | 0  | 2  | 2  | 96 | $\sigma(\text{R}_b)$                                  |

$\text{R}_a = -\text{C}_6\text{H}_4-$  (*p*-);  $\text{R}_b =$  octyl chain

**Table S17.** The main electronic transitions for **Re-Phe**, calculated with TDDFT method at the PBE1PBE/LANL2DZ level (in dichloromethane).

| Electronic transition                  | Contribution | Assignment                                                                            |           | $E_{\text{calc}}$<br>/eV | $\lambda_{\text{calc}}$<br>/nm | $f$    | $\lambda_{\text{exp}}$<br>/nm |
|----------------------------------------|--------------|---------------------------------------------------------------------------------------|-----------|--------------------------|--------------------------------|--------|-------------------------------|
| $\text{S}_0 \rightarrow \text{S}_1$    | H→L          | $\text{d}(\text{Re})+\pi(\text{CO})/\pi(\text{Cl}) \rightarrow \pi^*(\text{pyta})$    | MLCT/LLCT | 3.01                     | 412.0                          | 0.0009 |                               |
| $\text{S}_0 \rightarrow \text{S}_2$    | H-1→L        | $\text{d}(\text{Re})+\pi(\text{CO})/\pi(\text{Cl}) \rightarrow \pi^*(\text{pyta})$    | MLCT/LLCT | 3.21                     | 386.5                          | 0.1099 |                               |
| $\text{S}_0 \rightarrow \text{S}_3$    | H-2→L        | $\text{d}(\text{Re})+\pi(\text{CO}) \rightarrow \pi^*(\text{pyta})$                   | MLCT/LLCT | 3.55                     | 348.9                          | 0.0006 |                               |
| $\text{S}_0 \rightarrow \text{S}_8$    | H-3→L        | $\pi(\text{pyta})/\pi(\text{Cl}) \rightarrow \pi^*(\text{pyta})$                      | ILCT/LLCT | 4.41                     | 281.5                          | 0.1451 |                               |
| $\text{S}_0 \rightarrow \text{S}_{12}$ | H-5→L        | $\pi(\text{R}) \rightarrow \pi^*(\text{pyta})$                                        | ILCT      | 4.72                     | 262.6                          | 0.0577 |                               |
| $\text{S}_0 \rightarrow \text{S}_{16}$ | H-7→L        | $\pi(\text{Cl})/\pi(\text{pyta})/\text{d}(\text{Re}) \rightarrow \pi^*(\text{pyta})$  | LLCT/ILCT | 4.86                     | 255.2                          | 0.0915 |                               |
| $\text{S}_0 \rightarrow \text{S}_{21}$ | H-2→L+4      | $\text{d}(\text{Re})+\pi(\text{CO}) \rightarrow \text{p}(\text{Re})+\pi^*(\text{CO})$ | MLCT/LLCT | 5.10                     | 243.2                          | 0.0637 |                               |
|                                        | H-1→L+3      | $\text{d}(\text{Re})+\pi(\text{CO})/\pi(\text{Cl}) \rightarrow \pi^*(\text{R})$       | MLCT/LLCT |                          |                                |        |                               |
| $\text{S}_0 \rightarrow \text{S}_{22}$ | H-3→L+1      | $\pi(\text{pyta})/\pi(\text{Cl}) \rightarrow \pi^*(\text{pyta})$                      | LLCT      | 5.30                     | 234.1                          | 0.1168 |                               |
| $\text{S}_0 \rightarrow \text{S}_{30}$ | H-6→L+1      | $\pi(\text{Cl})/\text{d}(\text{Re}) \rightarrow \pi^*(\text{pyta})$                   | LLCT      | 5.57                     | 222.5                          | 0.0776 |                               |
| $\text{S}_0 \rightarrow \text{S}_{36}$ | H-5→L+1      | $\pi(\text{R}) \rightarrow \pi^*(\text{pyta})$                                        | ILCT      | 5.74                     | 216.0                          | 0.0453 |                               |
| $\text{S}_0 \rightarrow \text{S}_{50}$ | H-10→L       | $\pi(\text{pyta}) \rightarrow \pi^*(\text{pyta})$                                     | ILCT      | 6.15                     | 201.5                          | 0.0855 |                               |
|                                        | H-11→L       | $\pi(\text{pyta}) \rightarrow \pi^*(\text{pyta})$                                     | ILCT      |                          |                                |        |                               |

MLCT: metal-to-ligand charge transfer; LMCT: ligand-to-metal charge transfer; LLCT: ligand-to-ligand charge transfer; ILCT: intraligand charge transfer.

**Table S18.** The main electronic transitions for **Mono-Re-Phe**, calculated with TDDFT method at the PBE1PBE/LANL2DZ level and experimental (in dichloromethane).

| Electronic transition                  | Contribution | Assignment                                                                           |           | $E_{\text{calc}}$<br>/eV | $\lambda_{\text{calc}}$<br>/nm | $f$    | $\lambda_{\text{exp}}$<br>/nm |
|----------------------------------------|--------------|--------------------------------------------------------------------------------------|-----------|--------------------------|--------------------------------|--------|-------------------------------|
| $\text{S}_0 \rightarrow \text{S}_1$    | H→L          | $\text{d}(\text{Re})+\pi(\text{CO})/\pi(\text{Cl}) \rightarrow \pi^*(\text{pyta})$   | MLCT/LLCT | 3.04                     | 408.3                          | 0.0017 |                               |
| $\text{S}_0 \rightarrow \text{S}_2$    | H-1→L        | $\text{d}(\text{Re})+\pi(\text{CO})/\pi(\text{Cl}) \rightarrow \pi^*(\text{pyta})$   | MLCT/LLCT | 3.24                     | 382.8                          | 0.1088 | 379                           |
| $\text{S}_0 \rightarrow \text{S}_3$    | H-2→L        | $\text{d}(\text{Re})+\pi(\text{CO}) \rightarrow \pi^*(\text{pyta})$                  | MLCT/LLCT | 3.58                     | 346.1                          | 0.0009 |                               |
| $\text{S}_0 \rightarrow \text{S}_6$    | H-3→L        | $\pi(\text{pyta})/\pi(\text{Cl}) \rightarrow \pi^*(\text{pyta})$                     | ILCT/LLCT | 4.32                     | 287.3                          | 0.1891 | 287                           |
| $\text{S}_0 \rightarrow \text{S}_{11}$ | H-6→L        | $\pi(\text{Cl})/\text{d}(\text{Re}) \rightarrow \pi^*(\text{pyta})$                  | LLCT      | 4.64                     | 267.0                          | 0.0398 |                               |
| $\text{S}_0 \rightarrow \text{S}_{12}$ | H-4→L        | $\pi(\text{R}_a) \rightarrow \pi^*(\text{pyta})$                                     | ILCT      | 4.73                     | 261.9                          | 0.0650 |                               |
| $\text{S}_0 \rightarrow \text{S}_{15}$ | H-7→L        | $\pi(\text{Cl})/\pi(\text{pyta})/\text{d}(\text{Re}) \rightarrow \pi^*(\text{pyta})$ | LLCT/ILCT | 4.82                     | 257.2                          | 0.0730 |                               |
|                                        | H-5→L        | $\pi(\text{R}_a) \rightarrow \pi^*(\text{pyta})$                                     | ILCT      |                          |                                |        |                               |
| $\text{S}_0 \rightarrow \text{S}_{22}$ | H-3→L+1      | $\pi(\text{pyta})/\pi(\text{Cl}) \rightarrow \pi^*(\text{pyta})$                     | ILCT/LLCT | 5.20                     | 238.7                          | 0.1576 | 232                           |
| $\text{S}_0 \rightarrow \text{S}_{30}$ | H-6→L+1      | $\pi(\text{Cl})/\text{d}(\text{Re}) \rightarrow \pi^*(\text{pyta})$                  | LLCT      | 5.57                     | 222.6                          | 0.0520 |                               |
| $\text{S}_0 \rightarrow \text{S}_{41}$ | H-2→L+8      | $\text{d}(\text{Re})+\pi(\text{CO}) \rightarrow \pi^*(\text{CO})/\pi^*(\text{pyta})$ | MLCT/LLCT | 5.88                     | 211.0                          | 0.0743 |                               |
| $\text{S}_0 \rightarrow \text{S}_{52}$ | H-19→L       | $\pi(\text{pyta})/\pi(\text{R}_b) \rightarrow \pi^*(\text{pyta})$                    | ILCT      | 6.10                     | 203.1                          | 0.0405 |                               |
|                                        | H-20→L       | $\pi(\text{pyta})/\pi(\text{R}_b) \rightarrow \pi^*(\text{pyta})$                    | ILCT      |                          |                                |        |                               |

MLCT: metal-to-ligand charge transfer; LMCT: ligand-to-metal charge transfer; LLCT: ligand-to-ligand charge transfer; ILCT: intraligand charge transfer

**Table S19.** The main electronic transitions for **Bi-Re-*meta*Phe** calculated with TDDFT method at the PBE1PBE/LANL2DZ level and experimental (in dichloromethane).

| Electronic transition     | Contribution | Assignment                                                                                                 |           | $E_{\text{calc}}$<br>/eV | $\lambda_{\text{calc}}$<br>/nm | $f$    | $\lambda_{\text{exp}}$<br>/nm |
|---------------------------|--------------|------------------------------------------------------------------------------------------------------------|-----------|--------------------------|--------------------------------|--------|-------------------------------|
| $S_0 \rightarrow S_1$     | H→L          | $d(\text{Re})+\pi(\text{CO})/\pi(\text{Cl}) \rightarrow \pi^*(\text{pyta})$                                | MLCT/LLCT | 2.98                     | 416.0                          | 0.0028 |                               |
|                           | H-1→L+1      | $d(\text{Re})+\pi(\text{CO})/\pi(\text{Cl}) \rightarrow \pi^*(\text{pyta})$                                | MLCT/LLCT |                          |                                |        |                               |
| $S_0 \rightarrow S_2$     | H-1→L        | $d(\text{Re})+\pi(\text{CO})/\pi(\text{Cl}) \rightarrow \pi^*(\text{pyta})$                                | MLCT/LLCT | 2.98                     | 415.9                          | 0.0003 |                               |
|                           | H→L+1        | $d(\text{Re})+\pi(\text{CO})/\pi(\text{Cl}) \rightarrow \pi^*(\text{pyta})$                                | MLCT/LLCT |                          |                                |        |                               |
| $S_0 \rightarrow S_3$     | H-3→L+1      | $d(\text{Re})+\pi(\text{CO})/\pi(\text{Cl}) \rightarrow \pi^*(\text{pyta})$                                | MLCT/LLCT | 3.18                     | 389.6                          | 0.1809 | 394                           |
|                           | H-2→L        | $d(\text{Re})+\pi(\text{CO})/\pi(\text{Cl}) \rightarrow \pi^*(\text{pyta})$                                | MLCT/LLCT |                          |                                |        |                               |
| $S_0 \rightarrow S_4$     | H-3→L        | $d(\text{Re})+\pi(\text{CO})/\pi(\text{Cl}) \rightarrow \pi^*(\text{pyta})$                                | MLCT/LLCT | 3.19                     | 389.0                          | 0.0455 |                               |
|                           | H-2→L+1      | $d(\text{Re})+\pi(\text{CO})/\pi(\text{Cl}) \rightarrow \pi^*(\text{pyta})$                                | MLCT/LLCT |                          |                                |        |                               |
| $S_0 \rightarrow S_{20}$  | H-7→L        | $\pi(\text{pyta})/\pi(\text{Cl}) \rightarrow \pi^*(\text{pyta})$                                           | ILCT/LLCT | 4.31                     | 287.8                          | 0.2731 | 289                           |
|                           | H-6→L+1      | $\pi(\text{pyta})/\pi(\text{Cl}) \rightarrow \pi^*(\text{pyta})$                                           | ILCT/LLCT |                          |                                |        |                               |
| $S_0 \rightarrow S_{22}$  | H-2→L+2      | $d(\text{Re})+\pi(\text{CO})/\pi(\text{Cl}) \rightarrow \pi^*(\text{pyta})/\pi^*(\text{R}_a)$              | MLCT/LLCT | 4.33                     | 286.5                          | 0.0566 |                               |
|                           | H-2→L+2      | $d(\text{Re})+\pi(\text{CO})/\pi(\text{Cl}) \rightarrow \pi^*(\text{pyta})/\pi^*(\text{R}_a)$              | MLCT/LLCT |                          |                                |        |                               |
| $S_0 \rightarrow S_{37}$  | H-8→L        | $\pi(\text{Cl})/d(\text{Re}) \rightarrow \pi^*(\text{pyta})$                                               | LLCT      | 4.59                     | 269.9                          | 0.0791 |                               |
|                           | H-9→L+1      | $\pi(\text{Cl})/d(\text{Re}) \rightarrow \pi^*(\text{pyta})$                                               | LLCT      |                          |                                |        |                               |
| $S_0 \rightarrow S_{43}$  | H-11→L       | $\pi(\text{Cl})/\pi(\text{pyta})/d(\text{Re}) \rightarrow \pi^*(\text{pyta})$                              | LLCT/ILCT | 4.78                     | 259.7                          | 0.3733 |                               |
|                           | H-10→L+1     | $\pi(\text{Cl})/\pi(\text{pyta})/d(\text{Re}) \rightarrow \pi^*(\text{pyta})$                              | LLCT/ILCT |                          |                                |        |                               |
| $S_0 \rightarrow S_{54}$  | H-4→L+6      | $d(\text{Re})+\pi(\text{CO}) \rightarrow p(\text{Re})+\pi^*(\text{CO})$                                    | MLCT/ILCT | 5.08                     | 244.0                          | 0.0633 |                               |
|                           | H-5→L+7      | $d(\text{Re})+\pi(\text{CO}) \rightarrow p(\text{Re})+\pi^*(\text{CO})$                                    | MLCT/ILCT |                          |                                |        |                               |
| $S_0 \rightarrow S_{58}$  | H-7→L+2      | $\pi(\text{pyta})/\pi(\text{Cl}) \rightarrow \pi^*(\text{pyta})/\pi^*(\text{R}_a)$                         | ILCT/LLCT | 5.14                     | 241.1                          | 0.1848 | 236                           |
| $S_0 \rightarrow S_{61}$  | H-6→L+3      | $\pi(\text{pyta})/\pi(\text{Cl}) \rightarrow \pi^*(\text{pyta})/\pi^*(\text{R}_a)$                         | ILCT/LLCT | 5.21                     | 238.2                          | 0.0500 |                               |
| $S_0 \rightarrow S_{69}$  | H-16→L       | $\pi(\text{Cl})/\pi(\text{pyta}) \rightarrow \pi^*(\text{pyta})$                                           | LLCT/ILCT | 5.36                     | 231.4                          | 0.0467 |                               |
| $S_0 \rightarrow S_{81}$  | H-9→L+3      | $\pi(\text{Cl})/d(\text{Re}) \rightarrow \pi^*(\text{pyta})/\pi^*(\text{R}_a)$                             | LLCT      | 5.53                     | 224.2                          | 0.1371 |                               |
|                           | H-8→L+2      | $\pi(\text{Cl})/d(\text{Re}) \rightarrow \pi^*(\text{pyta})/\pi^*(\text{R}_a)$                             | LLCT      |                          |                                |        |                               |
| $S_0 \rightarrow S_{96}$  | H→L+10       | $d(\text{Re})+\pi(\text{CO})/\pi(\text{Cl}) \rightarrow \pi^*(\text{pyta})/\pi^*(\text{R}_b)$              | MLCT/LLCT | 5.72                     | 216.8                          | 0.0421 |                               |
| $S_0 \rightarrow S_{100}$ | H-2→L+26     | $d(\text{Re})+\pi(\text{CO})/\pi(\text{Cl}) \rightarrow p(\text{Re})/\pi^*(\text{pyta})/\pi^*(\text{R}_b)$ | MLCT/LLCT | 5.74                     | 216.0                          | 0.0674 |                               |
|                           | H-2→L+31     | $d(\text{Re})+\pi(\text{CO})/\pi(\text{Cl}) \rightarrow p(\text{Re})/\pi^*(\text{pyta})/\pi^*(\text{R}_b)$ | MLCT/LLCT |                          |                                |        |                               |
| $S_0 \rightarrow S_{147}$ | H-1→L+12     | $d(\text{Re})+\pi(\text{CO})/\pi(\text{Cl}) \rightarrow \pi^*(\text{pyta})/\pi^*(\text{R}_b)$              | MLCT/LLCT | 6.11                     | 202.9                          | 0.0591 |                               |
|                           | H→L+11       | $d(\text{Re})+\pi(\text{CO})/\pi(\text{Cl}) \rightarrow \pi^*(\text{pyta})/\pi^*(\text{R}_b)$              | MLCT/LLCT |                          |                                |        |                               |
| $S_0 \rightarrow S_{150}$ | H-20→L+1     | $\pi(\text{R}_b) \rightarrow \pi^*(\text{pyta})$                                                           | ILCT      | 6.13                     | 202.2                          | 0.0783 |                               |

MLCT: metal-to-ligand charge transfer; LMCT: ligand-to-metal charge transfer; LLCT: ligand-to-ligand charge transfer; ILCT: intraligand charge transfer.

**Table S20.** The main electronic transitions for **Bi-Re-*para*Phe** calculated with TDDFT method at the PBE1PBE/LANL2DZ level (in dichloromethane).

| Electronic transition    | Contribution | Assignment                                                                             |                | $E_{\text{calc}}$<br>/eV | $\lambda_{\text{calc}}$<br>/nm | $f$    | $\lambda_{\text{exp}}$<br>/nm |
|--------------------------|--------------|----------------------------------------------------------------------------------------|----------------|--------------------------|--------------------------------|--------|-------------------------------|
| $S_0 \rightarrow S_1$    | H-1→L        | $d(\text{Re})+\pi(\text{CO})/\pi(\text{Cl}) \rightarrow \pi^*(\text{pyta})$            | MLCT/LLCT      | 2.99                     | 414.9                          | 0.0027 |                               |
|                          | H→L+1        | $d(\text{Re})+\pi(\text{CO})/\pi(\text{Cl}) \rightarrow \pi^*(\text{pyta})$            | MLCT/LLCT      |                          |                                |        |                               |
| $S_0 \rightarrow S_3$    | H-3→L        | $d(\text{Re})+\pi(\text{CO})/\pi(\text{Cl}) \rightarrow \pi^*(\text{pyta})$            | MLCT/LLCT      | 3.19                     | 388.7                          | 0.2357 | 391                           |
|                          | H-2→L+1      | $d(\text{Re})+\pi(\text{CO})/\pi(\text{Cl}) \rightarrow \pi^*(\text{pyta})$            | MLCT/LLCT      |                          |                                |        |                               |
| $S_0 \rightarrow S_{22}$ | H-7→L+1      | $\pi(\text{pyta})/\pi(\text{Cl}) \rightarrow \pi^*(\text{pyta})$                       | LLCT/ILCT      | 4.31                     | 287.5                          | 0.3775 | 289                           |
|                          | H-6→L        | $\pi(\text{pyta})/\pi(\text{Cl}) \rightarrow \pi^*(\text{pyta})$                       | LLCT/ILCT      |                          |                                |        |                               |
| $S_0 \rightarrow S_{35}$ | H-9→L        | $\pi(\text{Cl})/d(\text{Re}) \rightarrow \pi^*(\text{pyta})$                           | LLCT           | 4.60                     | 269.6                          | 0.0971 |                               |
|                          | H-8→L+1      | $\pi(\text{Cl})/d(\text{Re}) \rightarrow \pi^*(\text{pyta})$                           | LLCT           |                          |                                |        |                               |
| $S_0 \rightarrow S_{45}$ | H-11→L+1     | $\pi(\text{Cl})/\pi(\text{pyta})/d(\text{Re}) \rightarrow \pi^*(\text{pyta})$          | LLCT/ILCT      | 4.78                     | 259.5                          | 0.3732 |                               |
|                          | H-10→L       | $\pi(\text{Cl})/\pi(\text{pyta})/d(\text{Re}) \rightarrow \pi^*(\text{pyta})$          | LLCT/ILCT      |                          |                                |        |                               |
| $S_0 \rightarrow S_{47}$ | H-3→L+8      | $d(\text{Re})+\pi(\text{CO})/\pi(\text{Cl}) \rightarrow p(\text{Re})+\pi^*(\text{CO})$ | MLCT/ILCT/LLCT | 4.80                     | 258.4                          | 0.0732 |                               |
|                          | H-2→L+9      | $d(\text{Re})+\pi(\text{CO})/\pi(\text{Cl}) \rightarrow p(\text{Re})+\pi^*(\text{CO})$ | MLCT/ILCT/LLCT |                          |                                |        |                               |
| $S_0 \rightarrow S_{55}$ | H-5→L+6      | $d(\text{Re})+\pi(\text{CO}) \rightarrow p(\text{Re})+\pi^*(\text{CO})$                | MLCT/ILCT      | 5.08                     | 244.0                          | 0.0655 |                               |
|                          | H-4→L+7      | $d(\text{Re})+\pi(\text{CO}) \rightarrow p(\text{Re})+\pi^*(\text{CO})$                | MLCT/ILCT      |                          |                                |        |                               |

|                           |          |                                                                                               |           |      |       |        |     |
|---------------------------|----------|-----------------------------------------------------------------------------------------------|-----------|------|-------|--------|-----|
| $S_0 \rightarrow S_{60}$  | H-7→L+4  | $\pi(\text{pyta})/\pi(\text{Cl}) \rightarrow \pi^*(\text{pyta})$                              | ILCT/LLCT | 5.18 | 239.4 | 0.2658 | 236 |
|                           | H-3→L+3  | $d(\text{Re})+\pi(\text{CO})/\pi(\text{Cl}) \rightarrow \pi^*(\text{pyta})/\pi^*(\text{R}_a)$ | MLCT/LLCT |      |       |        |     |
| $S_0 \rightarrow S_{68}$  | H-17→L   | $\pi(\text{Cl}) \rightarrow \pi^*(\text{pyta})$                                               | LLCT      | 5.38 | 230.4 | 0.0522 |     |
|                           | H-16→L+1 | $\pi(\text{Cl}) \rightarrow \pi^*(\text{pyta})$                                               | LLCT      |      |       |        |     |
| $S_0 \rightarrow S_{75}$  | H-6→L+5  | $\pi(\text{pyta})/\pi(\text{Cl}) \rightarrow \pi^*(\text{R}_a)/\pi^*(\text{pyta})$            | ILCT/LLCT | 5.44 | 228.0 | 0.0504 |     |
|                           | H-7→L+4  | $\pi(\text{pyta})/\pi(\text{Cl}) \rightarrow \pi^*(\text{pyta})$                              | ILCT/LLCT |      |       |        |     |
| $S_0 \rightarrow S_{81}$  | H-9→L+3  | $\pi(\text{Cl})/d(\text{Re}) \rightarrow \pi^*(\text{pyta})/\pi^*(\text{R}_a)$                | LLCT      | 5.54 | 224.0 | 0.0964 |     |
|                           | H-8→L+4  | $\pi(\text{Cl})/d(\text{Re}) \rightarrow \pi^*(\text{pyta})$                                  | LLCT      |      |       |        |     |
| $S_0 \rightarrow S_{122}$ | H-12→L+2 | $\pi^*(\text{R})/\pi(\text{pyta}) \rightarrow \pi^*(\text{R}_a)$                              | ILCT      | 5.94 | 208.6 | 0.1155 |     |
| $S_0 \rightarrow S_{128}$ | H-8→L+4  | $\pi(\text{Cl})/d(\text{Re}) \rightarrow \pi^*(\text{pyta})$                                  | LLCT      | 6.00 | 206.7 | 0.1292 |     |
| $S_0 \rightarrow S_{145}$ | H-21→L   | $\pi^*(\text{R}_b) \rightarrow \pi^*(\text{pyta})$                                            | ILCT      | 6.13 | 202.3 | 0.1293 |     |

MLCT: metal-to-ligand charge transfer; LMCT: ligand-to-metal charge transfer; LLCT: ligand-to-ligand charge transfer; ILCT: intraligand charge transfer.

**Table S21.** Excitation energies and oscillator strengths calculated on the optimized geometry of the first singlet excited state ( $S_1$ ) of complexes **Re-Phe**, **Mono-Re-Phe**, **Bi-Re-metaPhe** and **Bi-Re-paraPhe** (in dichloromethane) with TDDFT method at the PBE1PBE/LANL2DZ level.

| State                | Contribution | Assignment                                                                  | $E_{\text{calc}}$<br>/eV | $\lambda_{\text{calc}}$<br>/nm | $f$    |
|----------------------|--------------|-----------------------------------------------------------------------------|--------------------------|--------------------------------|--------|
| <b>Re-Phe</b>        |              |                                                                             |                          |                                |        |
| 1                    | HOMO→LUMO    | $d(\text{Re})+\pi(\text{CO})/\pi(\text{Cl}) \rightarrow \pi^*(\text{pyta})$ | 2.22                     | 559.0                          | 0.0016 |
| 2                    | H-1→LUMO     | $d(\text{Re})+\pi(\text{CO})/\pi(\text{Cl}) \rightarrow \pi^*(\text{pyta})$ | 2.62                     | 472.9                          | 0.1674 |
| 3                    | H-2→LUMO     | $d(\text{Re})+\pi(\text{CO}) \rightarrow \pi^*(\text{pyta})$                | 2.95                     | 419.7                          | 0.0006 |
| 4                    | HOMO→L+1     | $d(\text{Re})+\pi(\text{CO})/\pi(\text{Cl}) \rightarrow \pi^*(\text{pyta})$ | 3.60                     | 344.1                          | 0.0377 |
| <b>Mono-Re-Phe</b>   |              |                                                                             |                          |                                |        |
| 1                    | HOMO→LUMO    | $d(\text{Re})+\pi(\text{CO})/\pi(\text{Cl}) \rightarrow \pi^*(\text{pyta})$ | 2.26                     | 548.3                          | 0.0027 |
| 2                    | H-1→LUMO     | $d(\text{Re})+\pi(\text{CO})/\pi(\text{Cl}) \rightarrow \pi^*(\text{pyta})$ | 2.67                     | 464.4                          | 0.1655 |
| 3                    | H-2→LUMO     | $d(\text{Re})+\pi(\text{CO}) \rightarrow \pi^*(\text{pyta})$                | 3.00                     | 413.5                          | 0.0024 |
| 4                    | HOMO→L+1     | $d(\text{Re})+\pi(\text{CO})/\pi(\text{Cl}) \rightarrow \pi^*(\text{pyta})$ | 3.63                     | 341.2                          | 0.0389 |
| <b>Bi-Re-metaPhe</b> |              |                                                                             |                          |                                |        |
| 1                    | HOMO→LUMO    | $d(\text{Re})+\pi(\text{CO})/\pi(\text{Cl}) \rightarrow \pi^*(\text{pyta})$ | 2.21                     | 560.8                          | 0.0019 |
| 2                    | H-1→LUMO     | $d(\text{Re})+\pi(\text{CO})/\pi(\text{Cl}) \rightarrow \pi^*(\text{pyta})$ | 2.62                     | 473.1                          | 0.1680 |
| 3                    | H-4→LUMO     | $d(\text{Re})+\pi(\text{CO}) \rightarrow \pi^*(\text{pyta})$                | 2.95                     | 420.9                          | 0.0014 |
| 4                    | H-2→L+1      | $d(\text{Re})+\pi(\text{CO})/\pi(\text{Cl}) \rightarrow \pi^*(\text{pyta})$ | 2.98                     | 416.0                          | 0.0026 |
| <b>Bi-Re-paraPhe</b> |              |                                                                             |                          |                                |        |
| 1                    | HOMO→LUMO    | $d(\text{Re})+\pi(\text{CO})/\pi(\text{Cl}) \rightarrow \pi^*(\text{pyta})$ | 2.21                     | 560.6                          | 0.0021 |
| 2                    | H-1→LUMO     | $d(\text{Re})+\pi(\text{CO})/\pi(\text{Cl}) \rightarrow \pi^*(\text{pyta})$ | 2.62                     | 472.8                          | 0.1712 |
| 3                    | H-4→LUMO     | $d(\text{Re})+\pi(\text{CO}) \rightarrow \pi^*(\text{pyta})$                | 2.95                     | 420.6                          | 0.0012 |
| 4                    | H-2→L+1      | $d(\text{Re})+\pi(\text{CO})/\pi(\text{Cl}) \rightarrow \pi^*(\text{pyta})$ | 2.99                     | 415.0                          | 0.0021 |

**Table S22.** Phosphorescence emission energies of **Re-Phe**, **Mono-Re-Phe**, **Bi-Re-metaPhe** and **Bi-Re-paraPhe** calculated with DFT and TDDFT methods at the PBE1PBE/LANL2DZ level, in comparison with the experimental values.

| Complex              | DFT                  |       | Character                     | TDDFT |       |                    |                               | $\lambda_{\text{em}}(\text{Exp})$<br>nm |
|----------------------|----------------------|-------|-------------------------------|-------|-------|--------------------|-------------------------------|-----------------------------------------|
|                      | $\Delta E_{T_1-S_0}$ |       |                               | eV    | nm    | Major contribution | Character                     |                                         |
|                      | eV                   | nm    |                               |       |       |                    |                               |                                         |
| <b>Re-Phe</b>        | 1.96                 | 632.6 | $^3\text{MLCT}/^3\text{LLCT}$ | 1.93  | 641.9 | H→L                | $^3\text{MLCT}/^3\text{LLCT}$ | 626 <sup>a</sup>                        |
| <b>Mono-Re-Phe</b>   | 1.99                 | 623.0 | $^3\text{MLCT}/^3\text{LLCT}$ | 1.94  | 639.7 | H→L                | $^3\text{MLCT}/^3\text{LLCT}$ | 616                                     |
| <b>Bi-Re-metaPhe</b> | 1.94                 | 639.1 | $^3\text{MLCT}/^3\text{LLCT}$ | 1.90  | 653.1 | H→L                | $^3\text{MLCT}/^3\text{LLCT}$ | 636                                     |
| <b>Bi-Re-paraPhe</b> | 1.92                 | 645.8 | $^3\text{MLCT}/^3\text{LLCT}$ | 1.88  | 660.2 | H→L                | $^3\text{MLCT}/^3\text{LLCT}$ | 636                                     |

$\Delta E_{T_1-S_0}$  is the energy difference between the ground singlet and triplet states.

<sup>a</sup> From Poirot *et al. Dalton Trans.*, 2021, **50**, 13686–13698.

**Table S23.** Natural populations of the  $5d_{xy}$ ,  $5d_{xz}$ ,  $5d_{yz}$ ,  $5d_{x^2-y^2}$  and  $5d_z^2$  orbitals of the central atom in **Re-Phe**, **Mono-Re-Phe**, **Bi-Re-metaPhe** and **Bi-Re-paraPhe**.

| Orbital        | Complex |             |               |       |               |       |
|----------------|---------|-------------|---------------|-------|---------------|-------|
|                | Re-Phe  | Mono-Re-Phe | Bi-Re-metaPhe |       | Bi-Re-paraPhe |       |
| $5d_{xy}$      | 1.219   | 1.421       | 1.114         | 1.114 | 0.976         | 0.976 |
| $5d_{xz}$      | 1.229   | 1.465       | 1.341         | 1.341 | 1.513         | 1.513 |
| $5d_{yz}$      | 1.297   | 1.529       | 1.434         | 1.434 | 1.561         | 1.561 |
| $5d_{x^2-y^2}$ | 1.554   | 1.141       | 1.556         | 1.556 | 1.564         | 1.564 |
| $5d_z^2$       | 1.384   | 1.125       | 1.237         | 1.237 | 1.068         | 1.068 |

The population of  $5d$  orbitals ( $5d_{xy}$ ,  $5d_{xz}$ ,  $5d_{yz}$ ,  $5d_{x^2-y^2}$  and  $5d_z^2$ ) of the central atoms shows that in free Re (+1) state, the population of  $5d_{xy}$ ,  $5d_{xz}$  and  $5d_{yz}$  orbitals are 2.0, 2.0 and 2.0 (e) and the other two ( $5d_{x^2-y^2}$  and  $5d_z^2$ ) orbitals remain vacant. On complex formation, some decrease in populations for the  $5d_{xy}$ ,  $5d_{xz}$  and  $5d_{yz}$  orbital and some increase in the populations of  $5d_{x^2-y^2}$  and  $5d_z^2$  orbital can be observed in comparison to free Re (+1) state.

**Table S24.** Atomic charges from the Natural Population Analysis (NPA) for **Re-Phe**, **Mono-Re-Phe**, **Bi-Re-metaPhe** and **Bi-Re-paraPhe**.

| Atom  | Complex |             |               |       |               |       |
|-------|---------|-------------|---------------|-------|---------------|-------|
|       | Re-Phe  | Mono-Re-Phe | Bi-Re-metaPhe |       | Bi-Re-paraPhe |       |
| Re(1) | -0.99   | -0.99       | -0.99         | -0.99 | -0.99         | -0.99 |
| C(1)  | +0.76   | +0.74       | +0.74         | +0.74 | +0.74         | +0.74 |
| C(2)  | +0.77   | +0.77       | +0.77         | +0.77 | +0.77         | +0.77 |
| C(3)  | +0.74   | +0.76       | +0.76         | +0.76 | +0.76         | +0.76 |
| N(1)  | -0.39   | -0.39       | -0.39         | -0.39 | -0.39         | -0.39 |
| N(2)  | -0.23   | -0.26       | -0.23         | -0.23 | -0.26         | -0.25 |
| Cl(1) | -0.46   | -0.46       | -0.46         | -0.46 | -0.46         | -0.46 |
| O(1)  | -0.48   | -0.49       | -0.49         | -0.49 | -0.49         | -0.49 |
| O(2)  | -0.47   | -0.47       | -0.47         | -0.47 | -0.47         | -0.47 |
| O(3)  | -0.49   | -0.48       | -0.48         | -0.48 | -0.48         | -0.48 |

Natural population analysis (NPA) calculates the charge that is transferred between the donor and acceptor moieties and this charge transfer indicates electrovalent bonding between the Re and ligand. The calculated charge on the rhenium atoms is -0.99 (e) in **Re-Phe**, **Mono-Re-Phe**, **Bi-Re-metaPhe** and **Bi-Re-paraPhe** which is slightly lower than the formal charge of +1, as a result of charge donation from the N atoms of the ligand. The charge on the nitrogen atoms is smaller and less negative, indicating that there is higher electron density delocalization from the N atoms to Re atoms. The positively charged carbon atoms of the carbonyl ligands are found to accept as much as ~0.74/0.77/0.76 (e) from Re atoms, while the Re atoms donates charge 0.99 (e). The negatively charged nitrogen atoms **N(1)**, **N(2)** and chlorine atom **Cl(1)** are found to donate as much as ~0.39 (e), -0.23 (e) and ~0.46 (e) to Re atoms, respectively.

**Table S25.** Absolute electronegativity, absolute hardness, dipole moment ( $\mu$ ), electrophilicity index ( $\omega$ ) and global softness ( $\sigma$ ) of complexes **Re-Phe**, **Mono-Re-Phe**, **Bi-Re-metaPhe** and **Bi-Re-paraPhe**.

| Parameter                        | Complex       |                    |                      |                      |
|----------------------------------|---------------|--------------------|----------------------|----------------------|
|                                  | <b>Re-Phe</b> | <b>Mono-Re-Phe</b> | <b>Bi-Re-metaPhe</b> | <b>Bi-Re-paraPhe</b> |
| Total Energy (Hartree)           | -1153.6934814 | -1467.8985047      | -2703.7740894        | -2703.7743660        |
| $E_{\text{HOMO}}$ (eV)           | -6.52         | -6.48              | -6.54                | -6.55                |
| $E_{\text{LUMO}}$ (eV)           | -2.51         | -2.45              | -2.58                | -2.57                |
| Energy gap $\Delta E$ (eV)       | 4.01          | 4.03               | 3.96                 | 3.98                 |
| Ionization Potential $I$         | 6.52          | 6.48               | 6.54                 | 6.55                 |
| Electron Affinity $A$            | 2.51          | 2.45               | 2.58                 | 2.57                 |
| Electronegativity $\chi$ (eV)    | 4.52          | 4.47               | 4.56                 | 4.56                 |
| Chemical potential $\mu$         | -4.52         | -4.47              | -4.56                | -4.56                |
| Hardness $\eta$ (eV)             | 2.01          | 2.02               | 1.98                 | 1.99                 |
| Softness $\sigma$ (eV)           | 0.50          | 0.50               | 0.51                 | 0.50                 |
| Electrophilicity $\omega$ (D/eV) | 5.08          | 4.95               | 5.25                 | 5.22                 |
| Dipole moment $\mu$ (D)          | 7.90          | 7.94               | 4.19                 | 0                    |

The determination of HOMO and LUMO energies is very important in view of chemical reaction. The HOMO (Highest Occupied Molecular Orbitals) is the orbital that primarily acts as an electron donor and the LUMO (Lowest Unoccupied Molecular Orbital) is the orbital that largely acts as the electron acceptor. The gap between HOMO and LUMO reflects the chemical reactivity and stability of the molecule.

The frontier molecular orbital descriptors such as ionization potential ( $IP = -E_{\text{HOMO}}$ ), electron affinity ( $EA = -E_{\text{LUMO}}$ ), electronegativity ( $\chi = (I + A)/2$ ), chemical potential ( $\mu = -\chi$ ), hardness ( $\eta = (I - A)/2$ ), softness ( $\sigma = 1/\eta$ ) and electrophilicity index ( $\omega = \mu^2/2\eta$ ) were calculated according to Koopmans theorem [T. Koopmans, *Physica*, 1933, 1, 104.]. Dipole moment was calculated using the equation:  $\mu = 2.54 \times (x^2 + y^2 + z^2)^{1/2}$ .

| Occupied orbitals                |                                                                                     | Unoccupied orbitals              |                                                                                       |
|----------------------------------|-------------------------------------------------------------------------------------|----------------------------------|---------------------------------------------------------------------------------------|
| <b>HOMO / 90</b><br>(-6.52 eV)   | 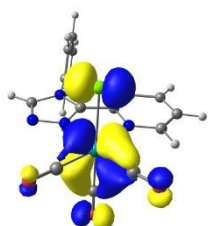   | <b>LUMO / 91</b><br>(-2.51 eV)   |    |
| <b>HOMO-1 / 89</b><br>(-6.63 eV) |    | <b>LUMO+1 / 92</b><br>(-1.65 eV) |    |
| <b>HOMO-2 / 88</b><br>(-7.11 eV) |    | <b>LUMO+2 / 93</b><br>(-1.15 eV) |    |
| <b>HOMO-3 / 87</b><br>(-7.79 eV) |  | <b>LUMO+3 / 94</b><br>(-1.01 eV) |  |
| <b>HOMO-4 / 86</b><br>(-8.07 eV) |  | <b>LUMO+4 / 95</b><br>(-0.76 eV) |  |
| <b>HOMO-5 / 85</b><br>(-8.09 eV) |  | <b>LUMO+5 / 96</b><br>(-0.63 eV) |  |

**Figure S35.** The isodensity plots of the frontier molecular orbitals of **Re-Phe** (in dichloromethane).



| Occupied orbitals                 |                                                                                     | Unoccupied orbitals               |                                                                                       |
|-----------------------------------|-------------------------------------------------------------------------------------|-----------------------------------|---------------------------------------------------------------------------------------|
| <b>HOMO / 122</b><br>(-6.48 eV)   | 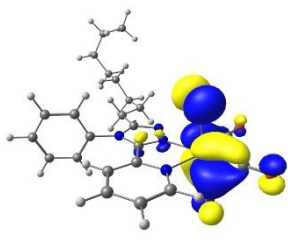   | <b>LUMO / 123</b><br>(-2.45 eV)   |    |
| <b>HOMO-1 / 121</b><br>(-6.60 eV) |    | <b>LUMO+1 / 124</b><br>(-1.59 eV) |    |
| <b>HOMO-2 / 120</b><br>(-7.07 eV) |   | <b>LUMO+2 / 125</b><br>(-1.14 eV) |   |
| <b>HOMO-3 / 119</b><br>(-7.60 eV) |  | <b>LUMO+3 / 126</b><br>(-0.95 eV) |  |
| <b>HOMO-4 / 118</b><br>(-8.03 eV) |  | <b>LUMO+4 / 127</b><br>(-0.73 eV) |  |
| <b>HOMO-5 / 117</b><br>(-8.06 eV) |  | <b>LUMO+5 / 128</b><br>(-0.58 eV) |  |

**Figure S36.** The isodensity plots of the frontier molecular orbitals of **Mono-Re-Phe** (in dichloromethane).

| Occupied orbitals                 |                                                                                     | Unoccupied orbitals               |                                                                                      |
|-----------------------------------|-------------------------------------------------------------------------------------|-----------------------------------|--------------------------------------------------------------------------------------|
| <b>HOMO / 223</b><br>(-6.54 eV)   | 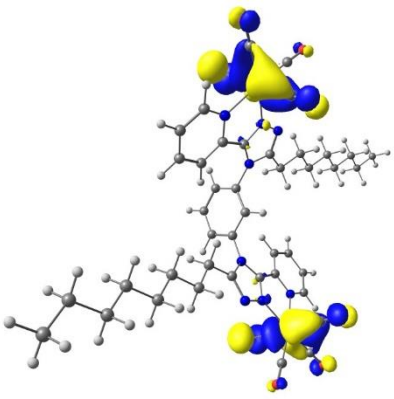   | <b>LUMO / 224</b><br>(-2.58 eV)   |    |
| <b>HOMO-1 / 222</b><br>(-6.55 eV) |   | <b>LUMO+1 / 225</b><br>(-2.56 eV) |   |
| <b>HOMO-2 / 221</b><br>(-6.66 eV) |  | <b>LUMO+2 / 226</b><br>(-1.84 eV) |  |
| <b>HOMO-3 / 220</b><br>(-6.66 eV) |  | <b>LUMO+3 / 227</b><br>(-1.79 eV) |  |

|                                               |                                                                                     |                                               |                                                                                      |
|-----------------------------------------------|-------------------------------------------------------------------------------------|-----------------------------------------------|--------------------------------------------------------------------------------------|
| <p><b>HOMO-4 /<br/>219</b><br/>(-7.14 eV)</p> | 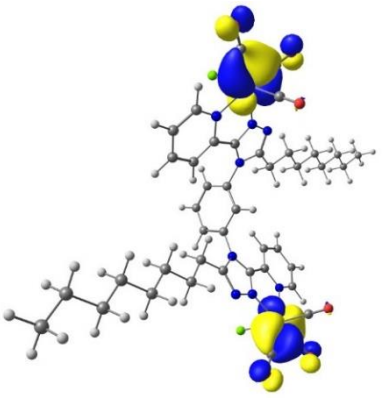   | <p><b>LUMO+4 /<br/>228</b><br/>(-1.62 eV)</p> |    |
| <p><b>HOMO-5 /<br/>218</b><br/>(-7.14 eV)</p> |   | <p><b>LUMO+5 /<br/>229</b><br/>(-1.52 eV)</p> |   |
| <p><b>HOMO-6 /<br/>217</b><br/>(-7.72 eV)</p> |  | <p><b>LUMO+6 /<br/>230</b><br/>(-0.80 eV)</p> |  |
| <p><b>HOMO-7 /<br/>216</b><br/>(-7.73 eV)</p> |  | <p><b>LUMO+7 /<br/>231</b><br/>(-0.79 eV)</p> |  |

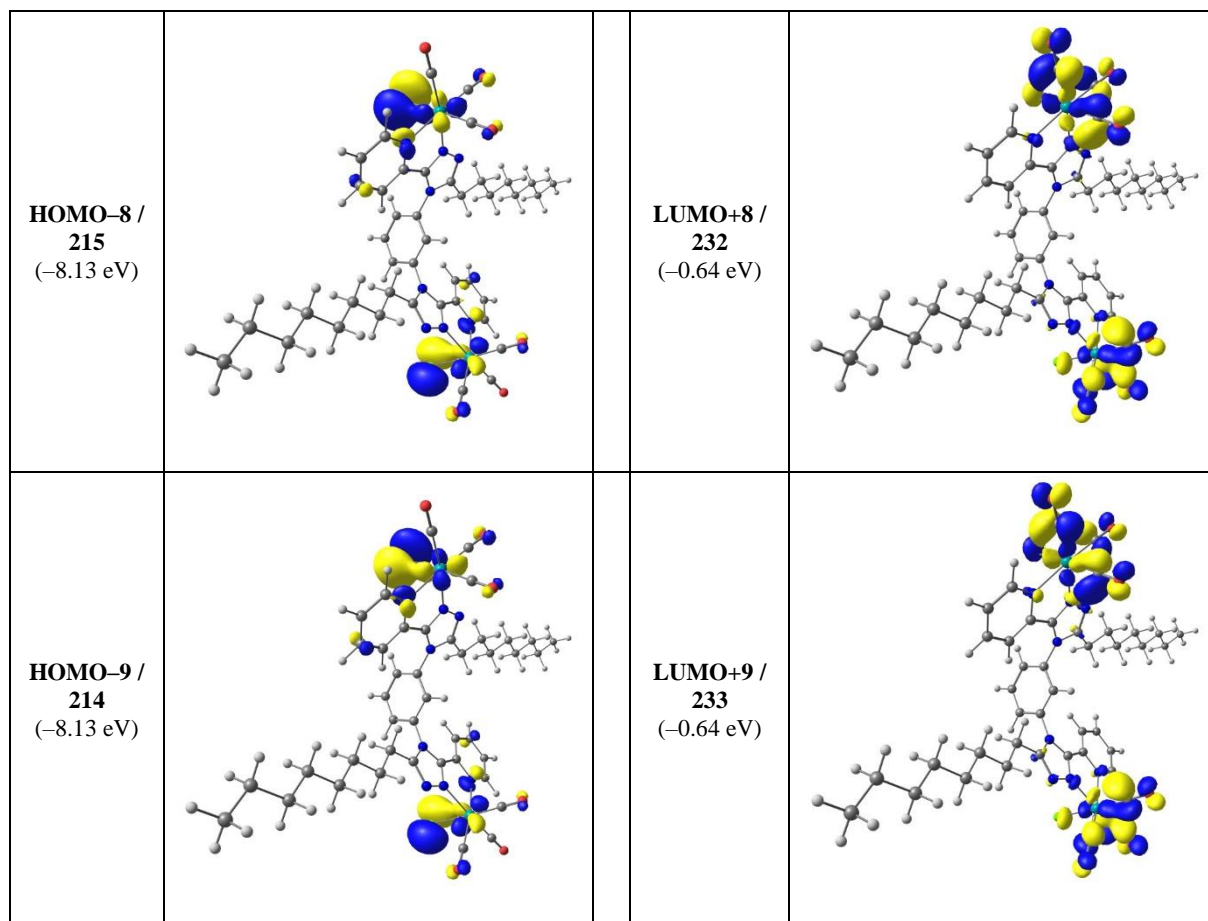

**Figure S37.** The isodensity plots of the frontier molecular orbitals of **Bi-Re-*meta*Phe** (in dichloromethane).

| Occupied orbitals                 |                                                                                     | Unoccupied orbitals               |                                                                                       |
|-----------------------------------|-------------------------------------------------------------------------------------|-----------------------------------|---------------------------------------------------------------------------------------|
| <b>HOMO / 223</b><br>(-6.55 eV)   | 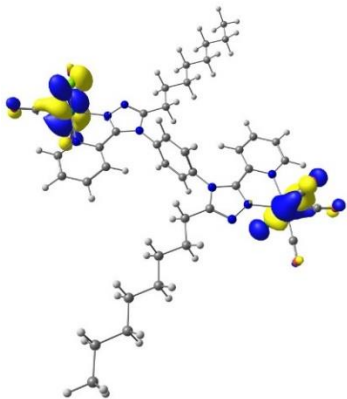   | <b>LUMO / 224</b><br>(-2.57 eV)   |    |
| <b>HOMO-1 / 222</b><br>(-6.55 eV) |   | <b>LUMO+1 / 225</b><br>(-2.56 eV) |   |
| <b>HOMO-2 / 221</b><br>(-6.66 eV) |  | <b>LUMO+2 / 226</b><br>(-1.88 eV) |  |
| <b>HOMO-3 / 220</b><br>(-6.66 eV) |  | <b>LUMO+3 / 227</b><br>(-1.78 eV) |  |

|                                               |                                                                                     |                                               |                                                                                       |
|-----------------------------------------------|-------------------------------------------------------------------------------------|-----------------------------------------------|---------------------------------------------------------------------------------------|
| <p><b>HOMO-4 /<br/>219</b><br/>(-7.14 eV)</p> | 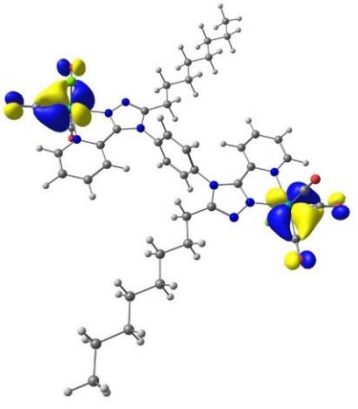   | <p><b>LUMO+4 /<br/>228</b><br/>(-1.66 eV)</p> |    |
| <p><b>HOMO-5 /<br/>218</b><br/>(-7.14 eV)</p> |   | <p><b>LUMO+5 /<br/>229</b><br/>(-1.44 eV)</p> |   |
| <p><b>HOMO-6 /<br/>217</b><br/>(-7.72 eV)</p> |  | <p><b>LUMO+6 /<br/>230</b><br/>(-0.80 eV)</p> |  |
| <p><b>HOMO-7 /<br/>216</b><br/>(-7.72 eV)</p> |  | <p><b>LUMO+7 /<br/>231</b><br/>(-0.79 eV)</p> |  |



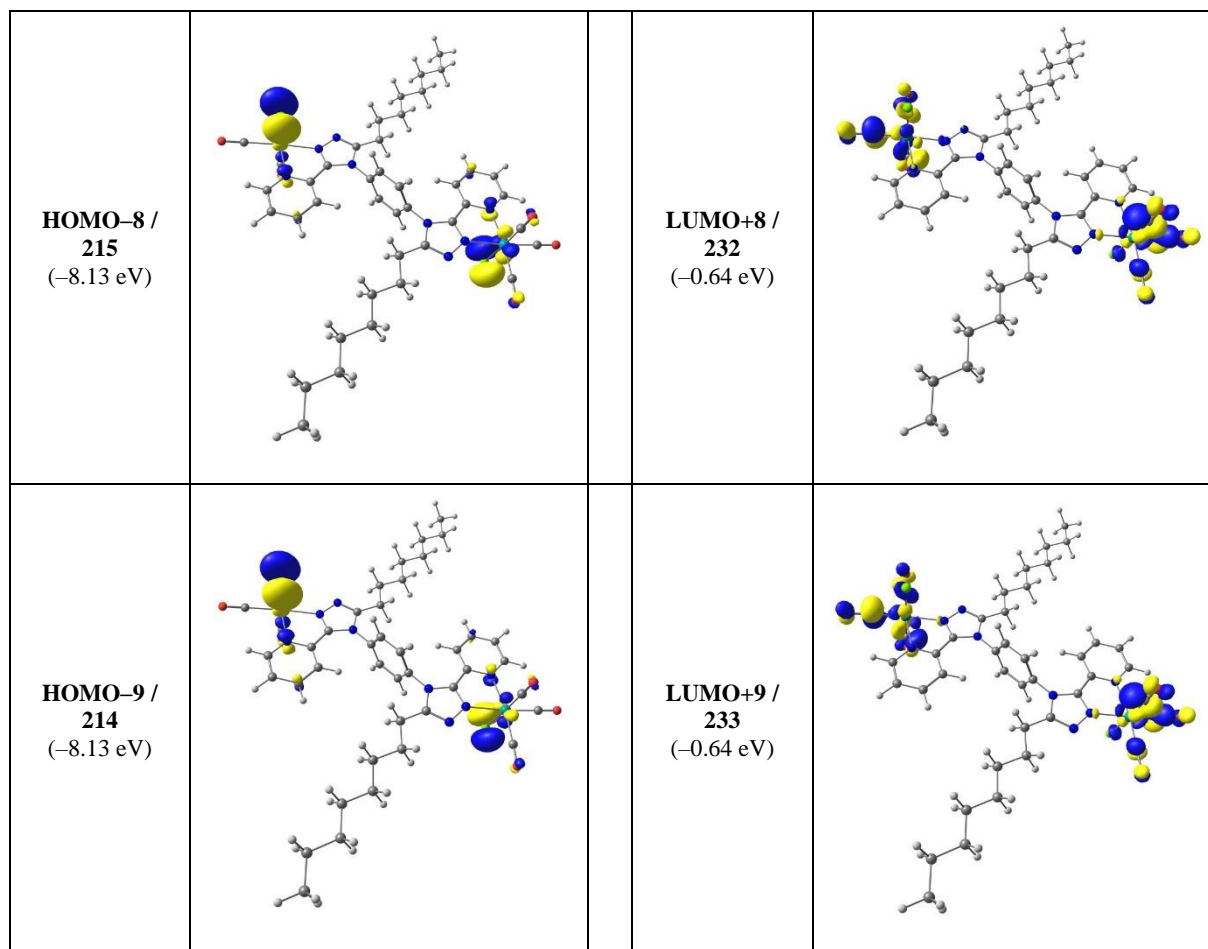

**Figure S38.** The isodensity plots of the frontier molecular orbitals of **Bi-Re-*para*Phe** (in dichloromethane).

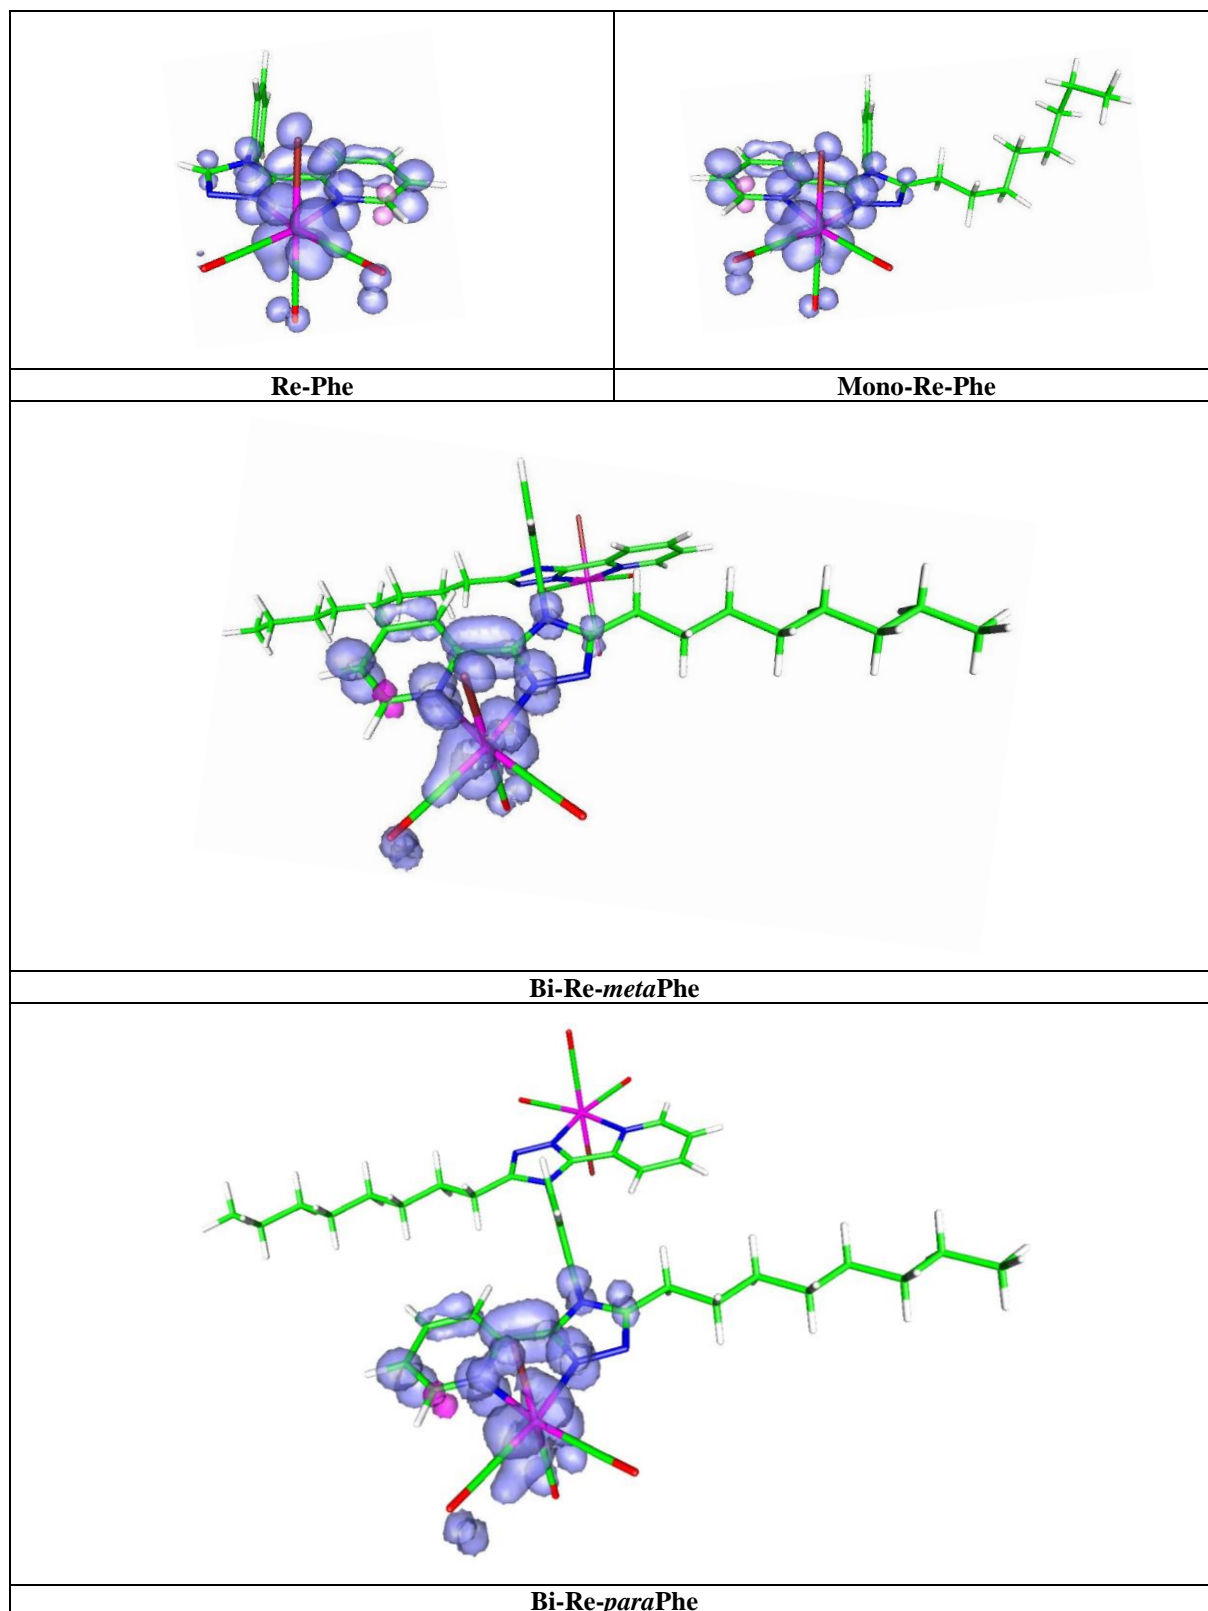

**Figure S39.** Spin density distribution for the lowest triplet state ( $T_1$ ) of **Re-Phe**, **Mono-Re-Phe**, **Bi-Re-*meta*Phe** and **Bi-Re-*para*Phe** (in dichloromethane) calculated based on the optimized triplet state with DFT method at the PBE1PBE/LanL2DZ level (isovalue surface of 0.0045 au).



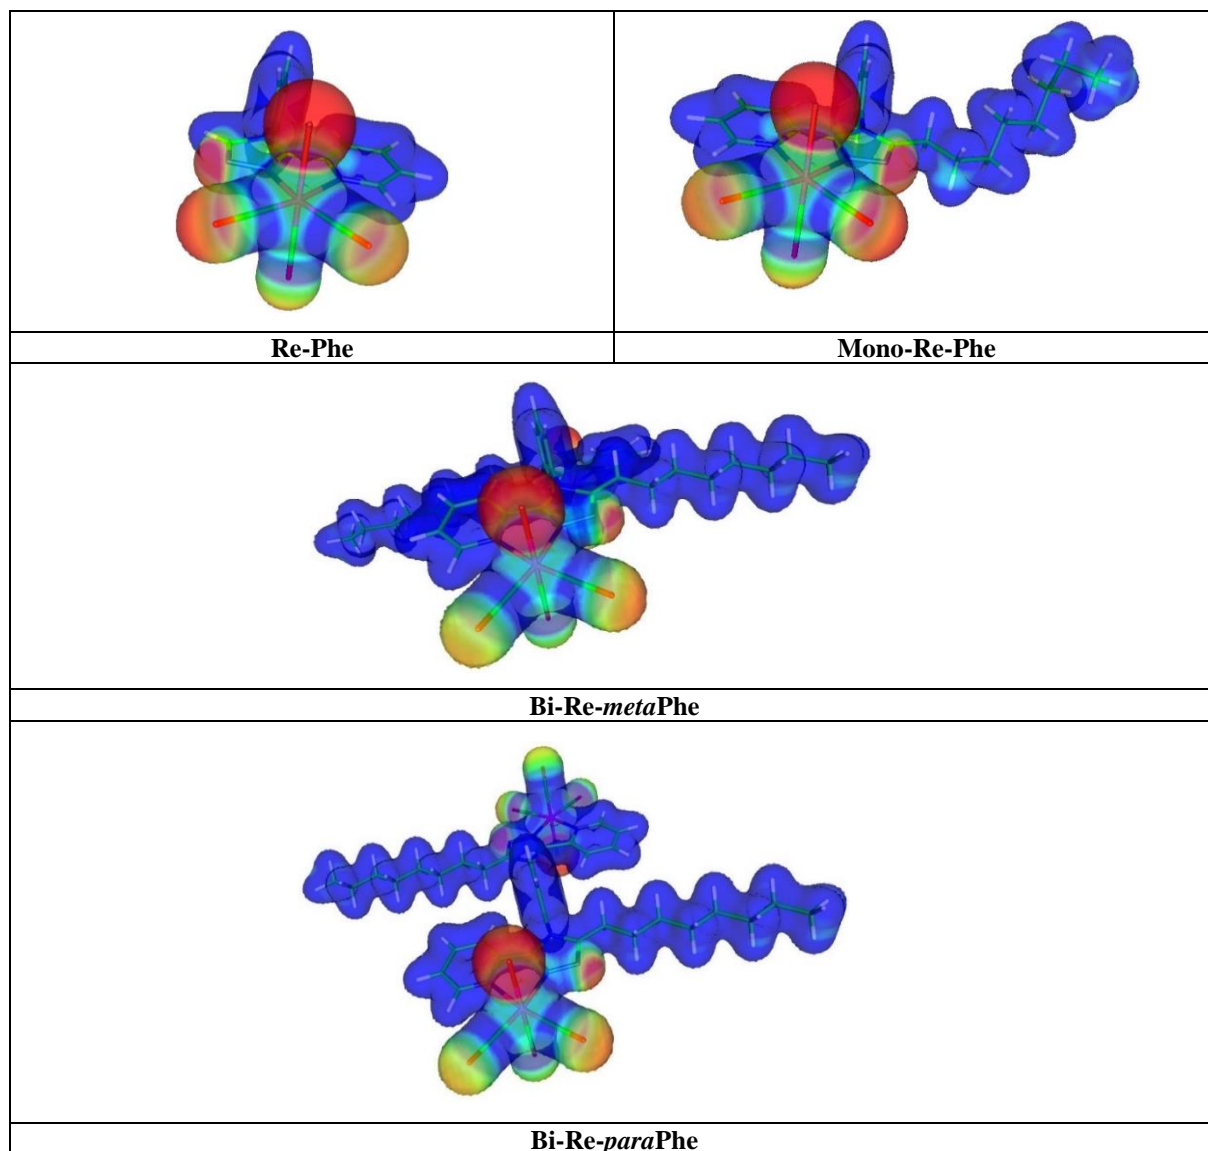

**Figure S40.** Molecular Electrostatic Potential (MEP) of **Re-Phe**, **Mono-Re-Phe**, **Bi-Re-*meta*Phe** and **Bi-Re-*para*Phe** (in dichloromethane) on the  $\rho(r) = 0.02$  au isodensity surface, calculated based on the optimized ground state geometry with DFT method at the PBE1PBE/LanL2DZ level. Mapping colours range from red  $-0.05$  au to blue  $+0.05$  au.

MEP surface plot helps to understand visually the relative polarity of the molecule, as shown in Figure 9. It is also useful to explain quantitatively hydrogen bonding, reactivity and structure–activity relationship of molecules including the biomolecules and drugs. MEP helps to find the sites for electrophilic and nucleophilic attacks as well as hydrogen bonding interactions. The MEP surfaces of **Re-Phe**, **Mono-Re-Phe**, **Bi-Re-*meta*Phe** and **Bi-Re-*para*Phe** studied by PBE1PBE/LanL2DZ were generated by mapping electrostatic potential onto the molecular electron density surface. In the MEP surface map, regions are represented by different colors which corresponds to different values of the electrostatic potential. The maximum negative region which preferred site for electrophilic attack is indicated as red color, whereas the maximum positive region which preferred site for nucleophilic attack is indicated as blue color. Potential increases in the order red < orange < yellow < green < cyan < blue, where red shows the strongest repulsion and blue shows the strongest attraction. Regions having the negative potential are over the electronegative atoms while the regions having the positive potential are over the electropositive atoms.

Negative electrostatic potential regions (red colour) of complexes **Re-Phe**, **Mono-Re-Phe**, **Bi-Re-*meta*Phe** and **Bi-Re-*para*Phe** are mainly localized around the chlorine Cl, the nitrogens N of the ligand as well as carbonyl oxygens. The positive electrostatic potential regions (blue colour) are around the hydrogen atoms.

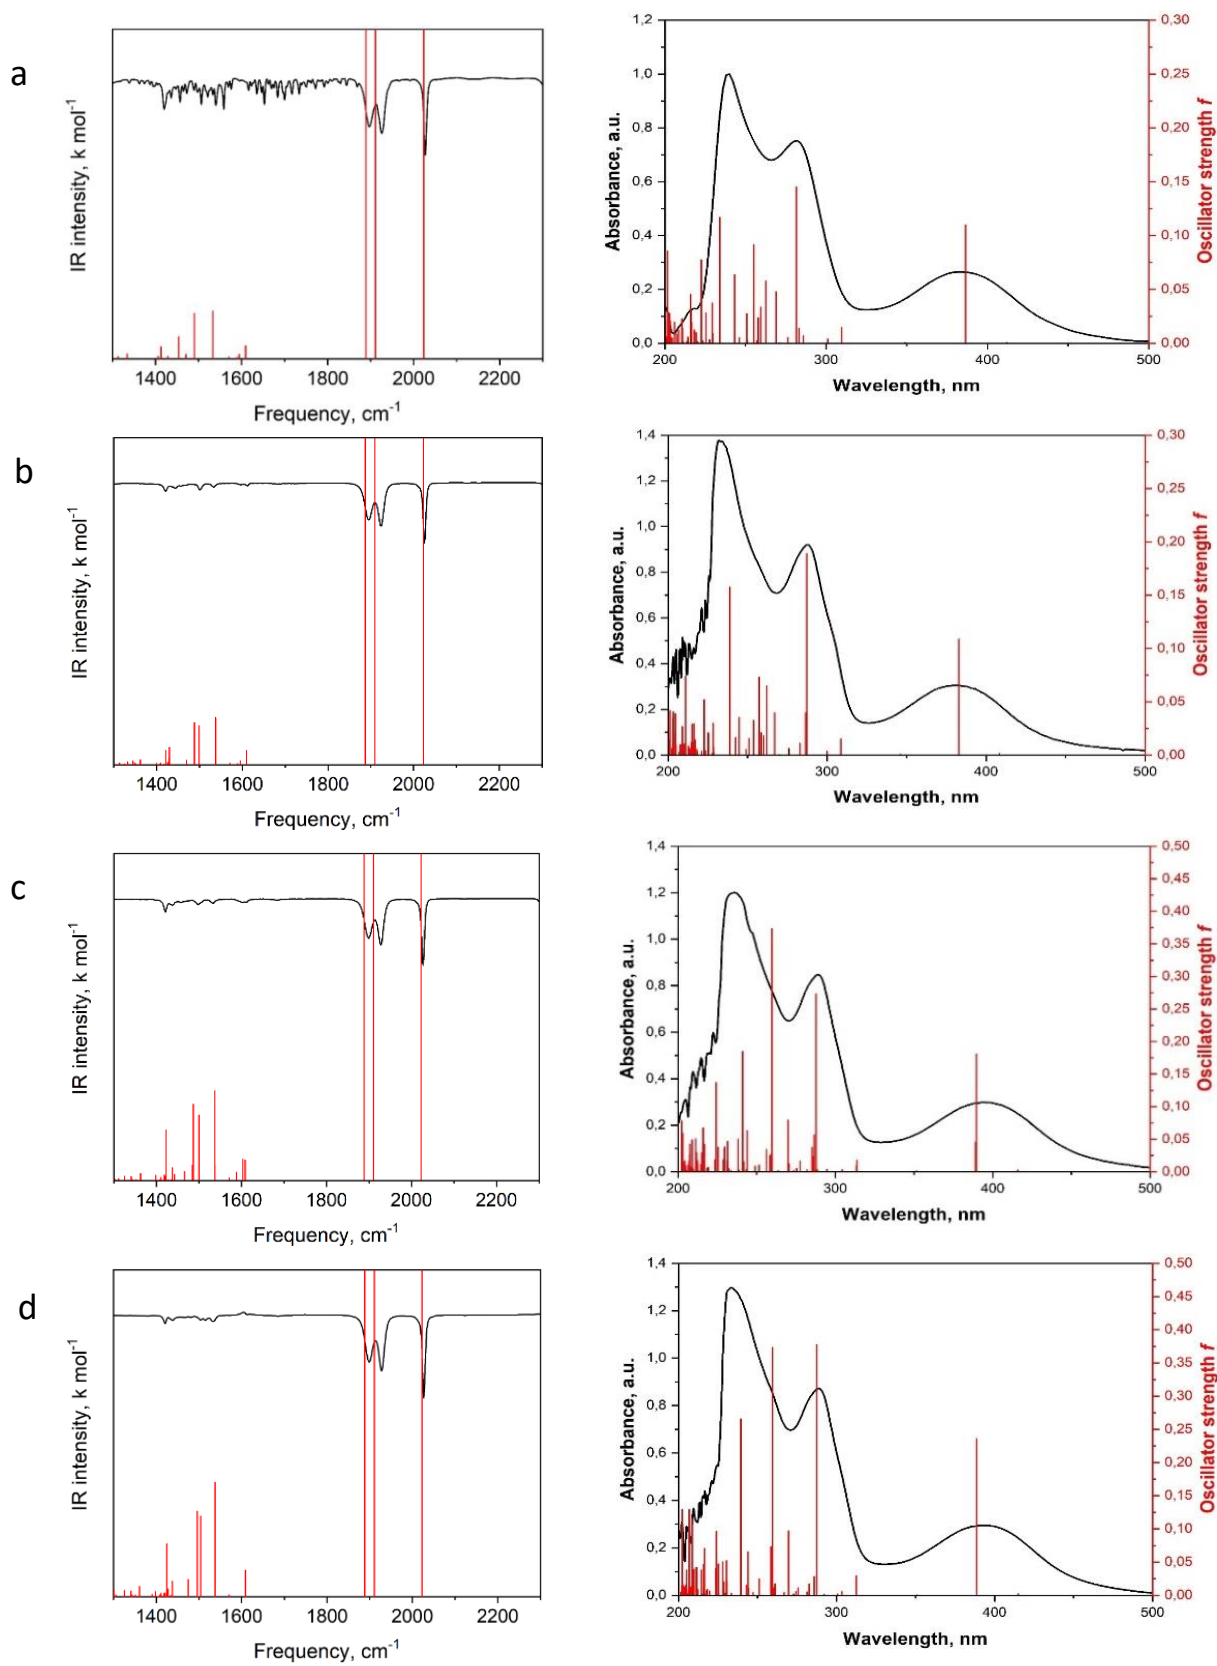

**Figure S41.** The experimental (black) and simulated (red) FT-IR spectra (left) and UV-Vis absorption spectra (right) of **Re-Phe** (a), **Mono-Re-Phe** (b), **Bi-Re-metaPhe** (c) and **Bi-Re-paraPhe** (d) in dichloromethane.

## Electrochemistry

**Table S26.** Experimental electrochemical data used, and calculated values of the energy gaps ( $E_g$ ) for complexes, **Mono-Re-Phe**, **Bi-Re-paraPhe**, and **Bi-Re-metaPhe**.

| Compound             | $E_{\text{onset ox}}$<br>(V) | $E_{\text{onset red}}$<br>(V) | $E_{\text{HOMO}}$<br>(eV) | $E_{\text{LUMO}}$<br>(eV) | $E_g^{\text{el}}$<br>(eV) | $E_{\text{calc}}^{\text{a}}$<br>(eV) |
|----------------------|------------------------------|-------------------------------|---------------------------|---------------------------|---------------------------|--------------------------------------|
| <b>Mono-Re-Phe</b>   | 1.07                         | -1.48                         | -5.81                     | -3.26                     | 2.55                      | 2.67                                 |
| <b>Bi-Re-paraPhe</b> | 1.33                         | -1.13                         | -6.07                     | -3.61                     | 2.46                      | 2.62                                 |
| <b>Bi-Re-metaPhe</b> | 1.33                         | -1.13                         | -6.07                     | -3.61                     | 2.46                      | 2.62                                 |

<sup>a</sup> The values were obtained using the TD-DFT method and considering the optimized geometry of the  $S_1$  state (see the theoretical section).

### Comment S3. Evaluation of the electrochemical energy gap values ( $E_g^{\text{el}}$ ) for the Re complexes.

The onset oxidation and reduction potentials ( $E_{\text{onset ox}}$ ,  $E_{\text{onset red}}$ ) were measured by cyclic voltammetry in volt *versus* SCE. The CVs were carried out at a potential scan rate of 200 mV s<sup>-1</sup> at room temperature.

The HOMO and LUMO energy levels ( $E_{\text{HOMO}}$  and  $E_{\text{LUMO}}$ ) in electron volt (eV) were calculated according to the empirical equations (1) and (2):<sup>[1]</sup>

$$E_{\text{HOMO}} \text{ (eV)} = -e (E_{\text{onset ox}} \text{ (V vs. SCE)} + 4.74 \text{ V}) \quad \text{Eq(1)}$$

$$E_{\text{LUMO}} \text{ (eV)} = -e (E_{\text{onset red}} \text{ (V vs. SCE)} + 4.74 \text{ V}) \quad \text{Eq(2)}$$

and the energy gap value was obtained as follows:  $E_g^{\text{el}} = (E_{\text{LUMO}} - E_{\text{HOMO}})$ .

The differences observed for the estimation of the energy gaps using experimental methods or theoretical calculations are well known. See for example: R. Stowasser, R. Hoffmann, *J. Am. Chem. Soc.* 1999, *121*, 3414-3420.

[1] a) Y. Zhou, J. W. Kim, R. Nandhakumar, M. J. Kim, E. Cho, Y. S. Kim, Y. H. Jang, C. Lee, S. Han, K. M. Kim, J.-J. Kim and J. Yoon, *Chem. Commun.* 2010, **46**, 6512-6514 and references therein; b) G. V. Loukova, *Chem. Phys. Lett.* 2002, **353**, 244-252.

## Electrochemical selected curves

**OSWV study** was performed on a Pt working electrode in  $\text{CH}_2\text{Cl}_2 + 0.1 \text{ M } n[\text{Bu}_4\text{N}][\text{BF}_4]$  at room temperature in the presence of ferrocene used as internal reference. Frequency 20 Hz, amplitude 20 mV, step potential 5 mV. Cyclic voltammograms of the indicated compounds were performed on a Pt working electrode in  $\text{CH}_2\text{Cl}_2 + 0.1 \text{ M } n[\text{Bu}_4\text{N}][\text{BF}_4]$  at room temperature at a scan rate of  $0.2 \text{ V s}^{-1}$  or at other mentioned scan rates.

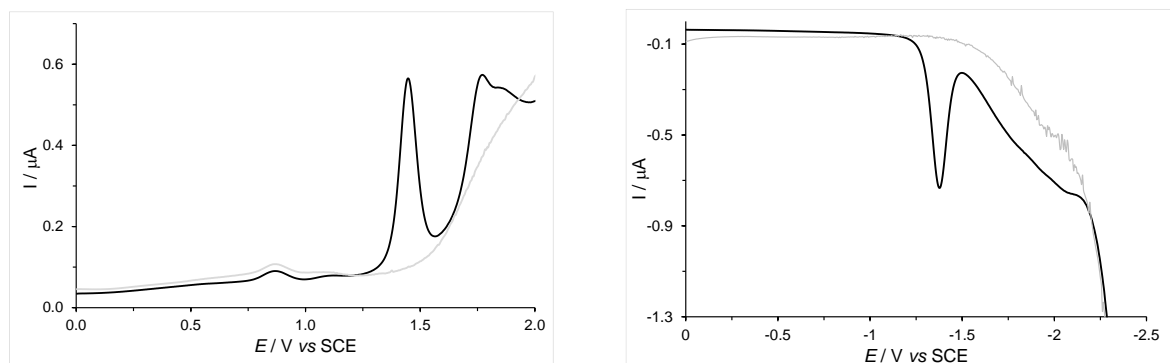

**Figure S42.** OSWVs: anodic (left) and cathodic (right) scans of complex **Mono-Re-Phe**.

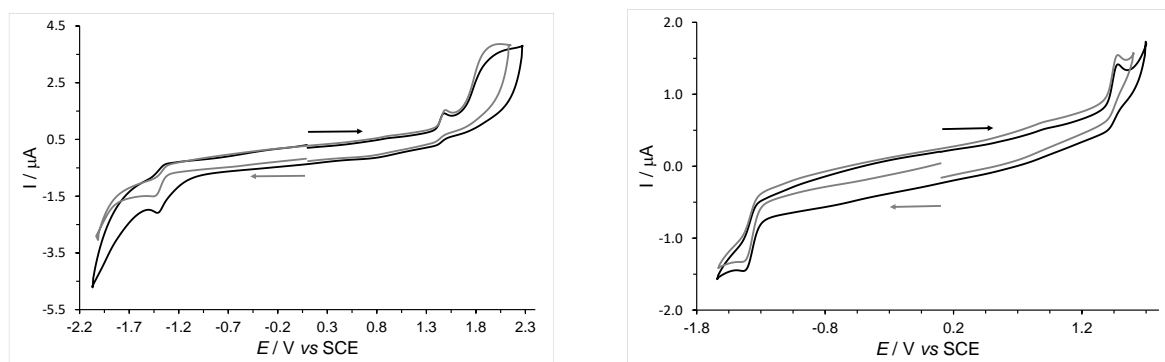

**Figure S43.** Cyclic voltammograms of complex **Mono-Re-Phe** (left), and of its first oxidation and reduction processes (right) at  $0.2 \text{ V/s}$ .

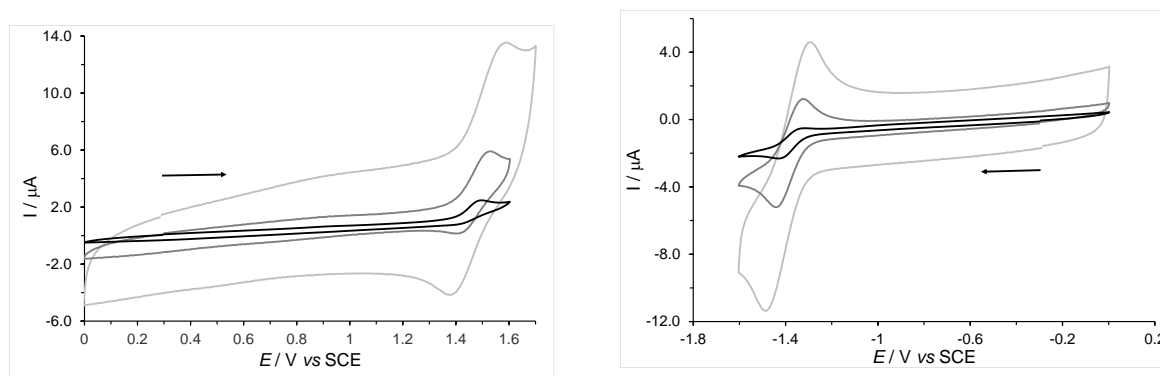

**Figure S44.** Cyclic voltammograms of the first oxidation process of complex **Mono-Re-Phe** at 1, 10, and  $50 \text{ V/s}$  from bottom-black line to top-light gray line (left), and of its first reduction process at 1, 10, and  $50 \text{ V/s}$  from bottom-black line to top-gray line (right).

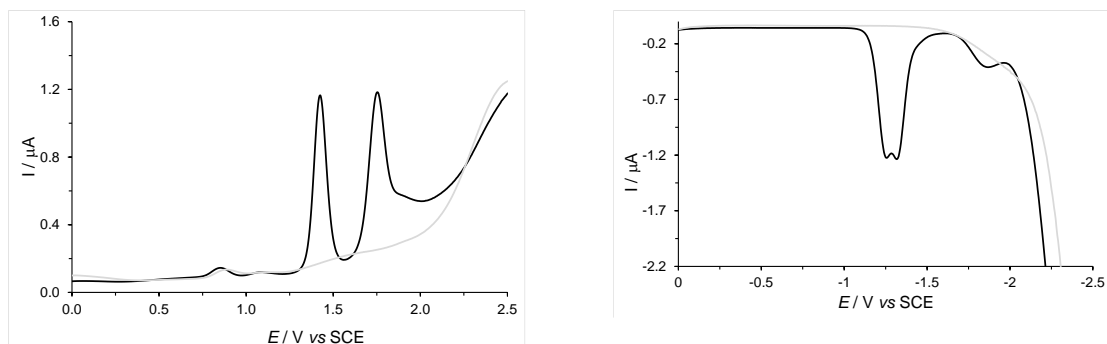

**Figure S45.** OSWVs: anodic (left) and cathodic (right) scans of complex **Bi-Re-paraPhe**.

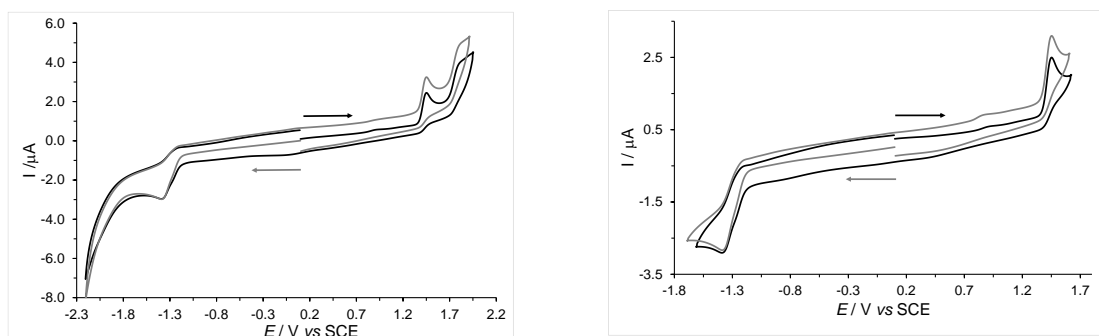

**Figure S46.** Cyclic voltammograms of complex **Bi-Re-paraPhe** (left), and of its first oxidation and reduction processes (right) at 0.2 V/s.

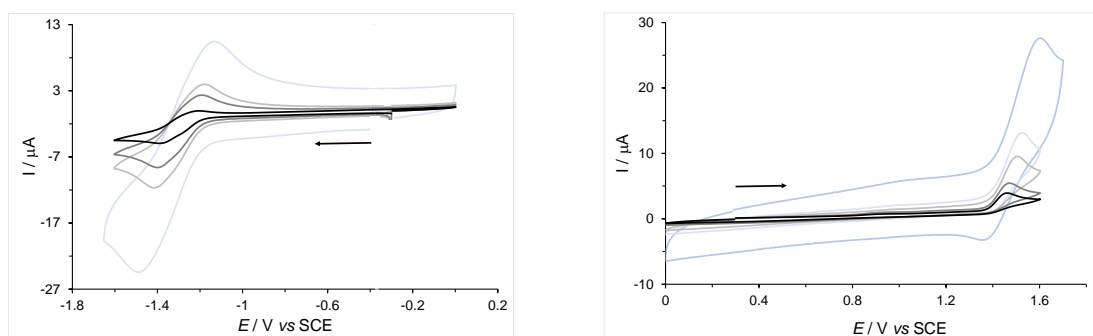

**Figure S47.** Cyclic voltammograms of the first reduction process of complex **Bi-Re-paraPhe** at 1, 5, 10, and 50 V/s from bottom-black line to top-light blue line (left), and of its first oxidation process at 1, 2, 5, 10, and 50 V/s from bottom-black line to top-gray line (right).

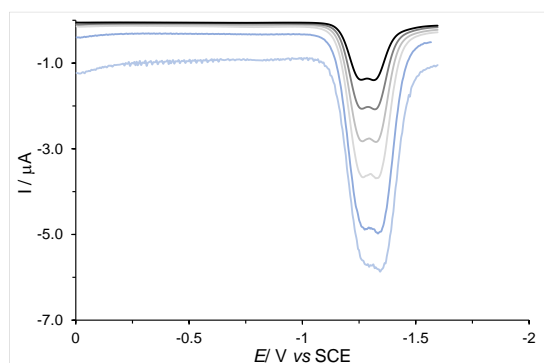

**Figure S48.** OSWVs: anodic scans of complex **Bi-Re-paraPhe** at different frequencies (20/50/100/200/500/1000) from black line to blue line with amplitude 20 mV and step potential 5 mV.

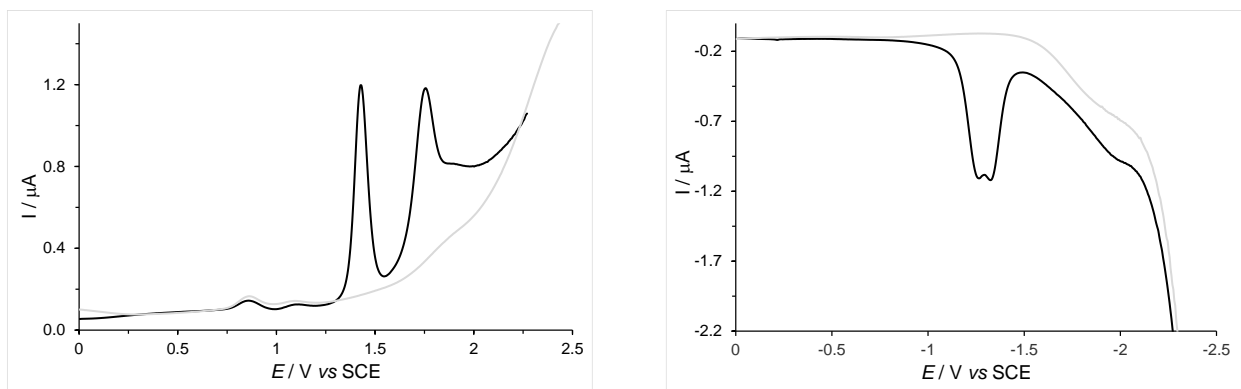

**Figure S49.** OSWVs: anodic (left) and cathodic (right) scans of complex **Bi-Re-metaPhe**.

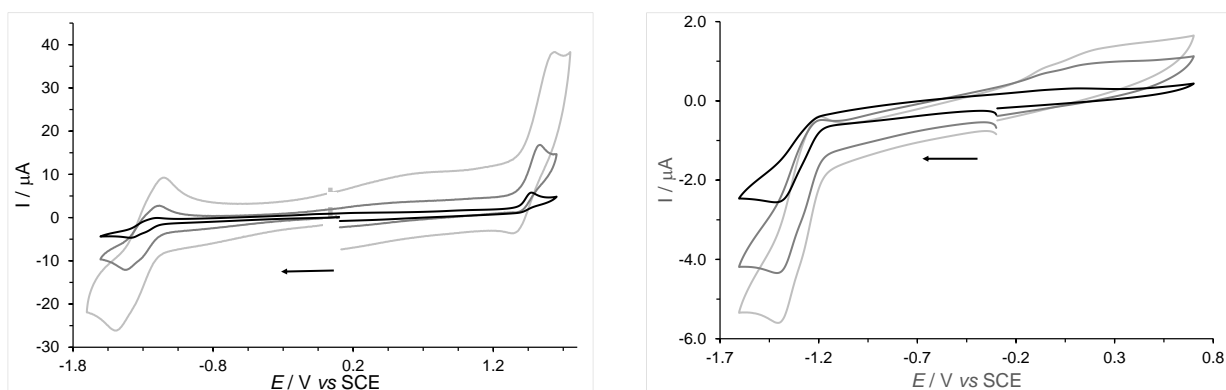

**Figure S50.** Cyclic voltammograms of complex **Bi-Re-metaPhe**, its first oxidation and reduction processes at 5, 10, 50 V/s from black to gray line (left) and its first reduction potential 0.1, 0.5, 1 V/s from black to gray line (right).

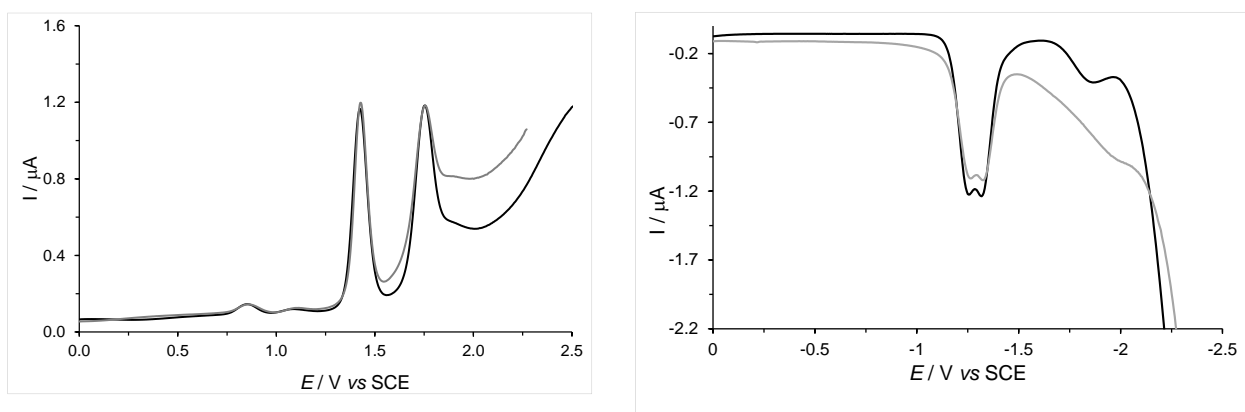

**Figure S51.** OSWVs: anodic (left) and cathodic (right) scans of complex **Bi-Re-paraPhe** (black) versus **Bi-Re-metaPhe** (gray).

### Selected curves of the corresponding ligands

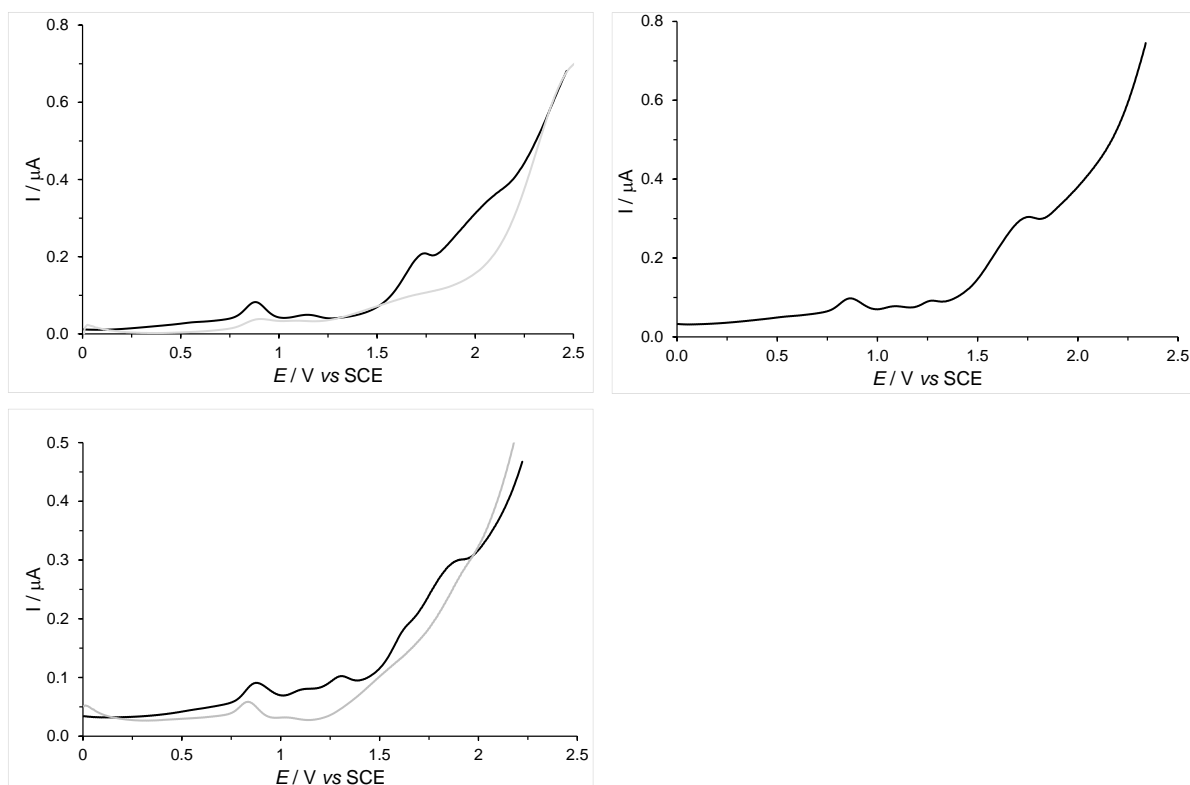

**Figure S52.** OSWVs: anodic scans of ligands **L-Phe** (top left), **L-paraPhe** (top right), and **L-metaPhe** (bottom), and of the corresponding electrochemical medium without the ligand (gray).

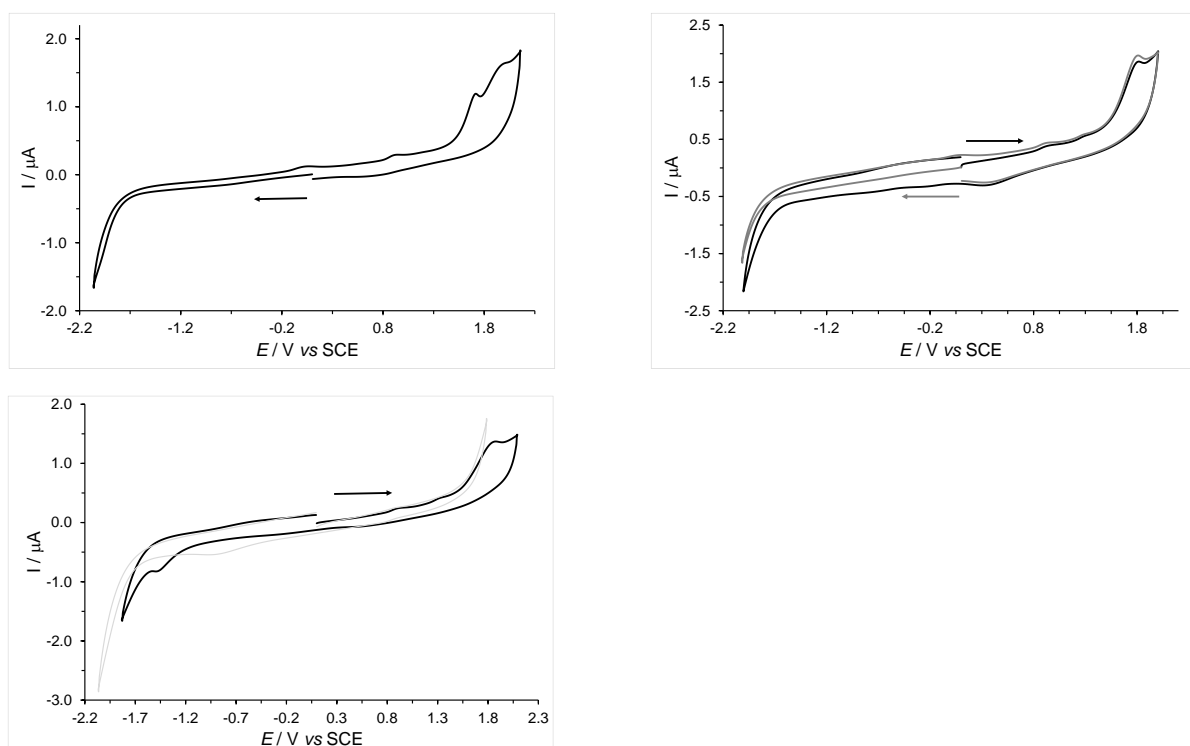

**Figure S53.** Cyclic voltammograms of ligands **L-Phe** (top left), **L-paraPhe** (top right), and **L-metaPhe** (bottom), and of the electrochemical medium without ligand in the last case in gray.

## Spectroscopy

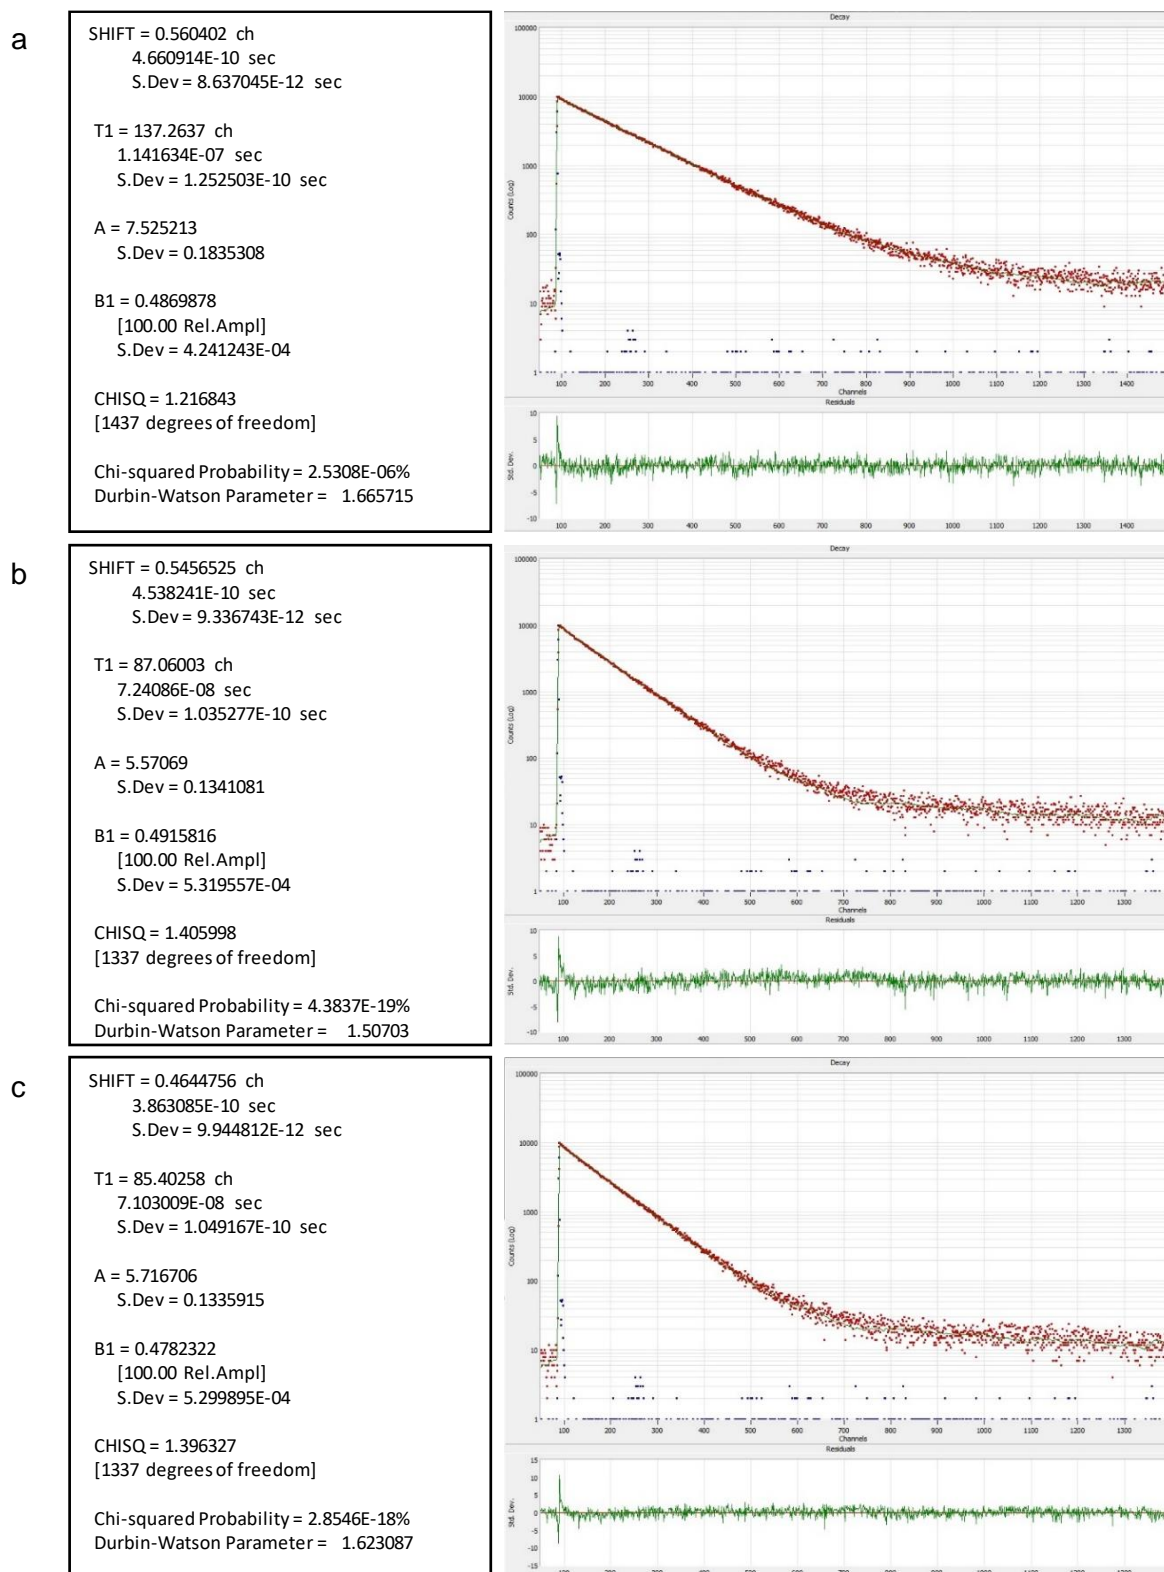

**Figure S54.** Emission decays of **Mono-Re-Phe** ( $\sim 1.2 \times 10^{-5}$  M) (a), and bimetallic complexes ( $\sim 6.6 \times 10^{-5}$  M) **Bi-Re-paraPhe** (b) and **Bi-Re-metaPhe** (c) in dichloromethane.  $\lambda_{\text{ex}} = 370$  nm.



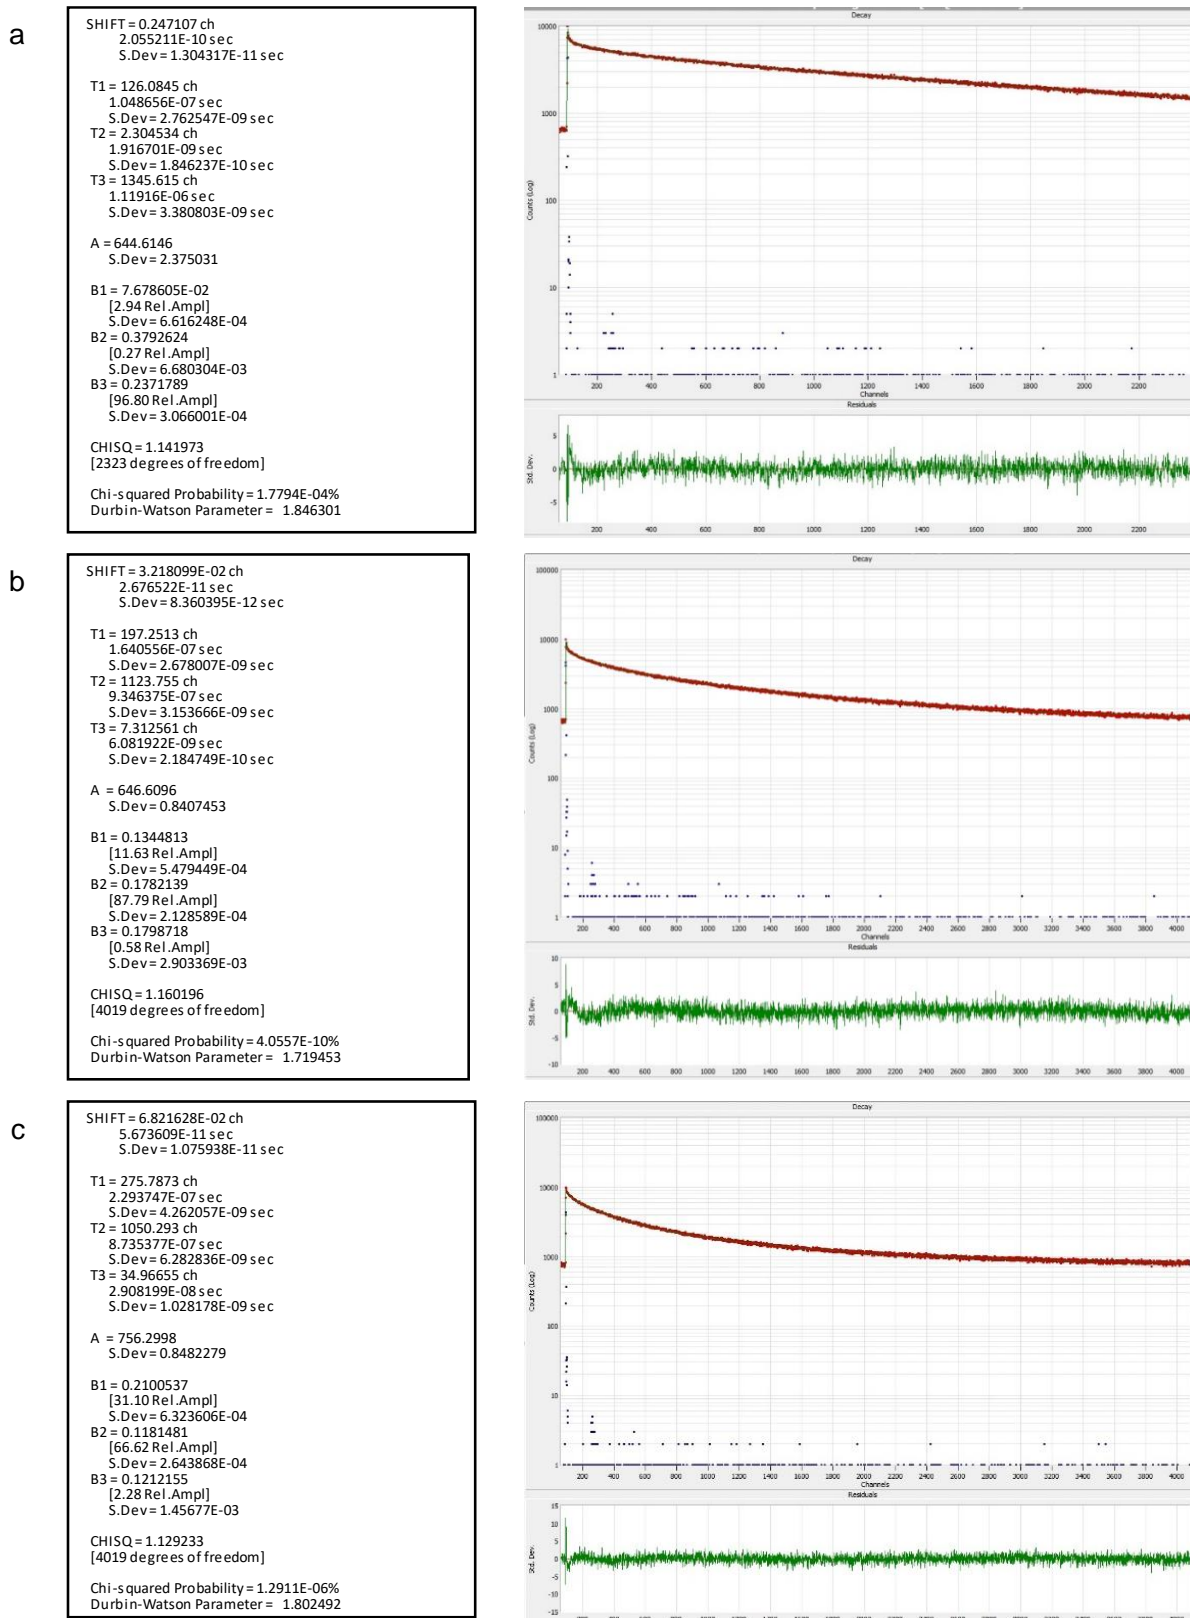

**Figure S55.** Emission decays of **Mono-Re-Phe** as pristine powder (a), and **Bi-Re-paraPhe** as pristine (b) and ground (c) powders.  $\lambda_{ex} = 370$  nm.

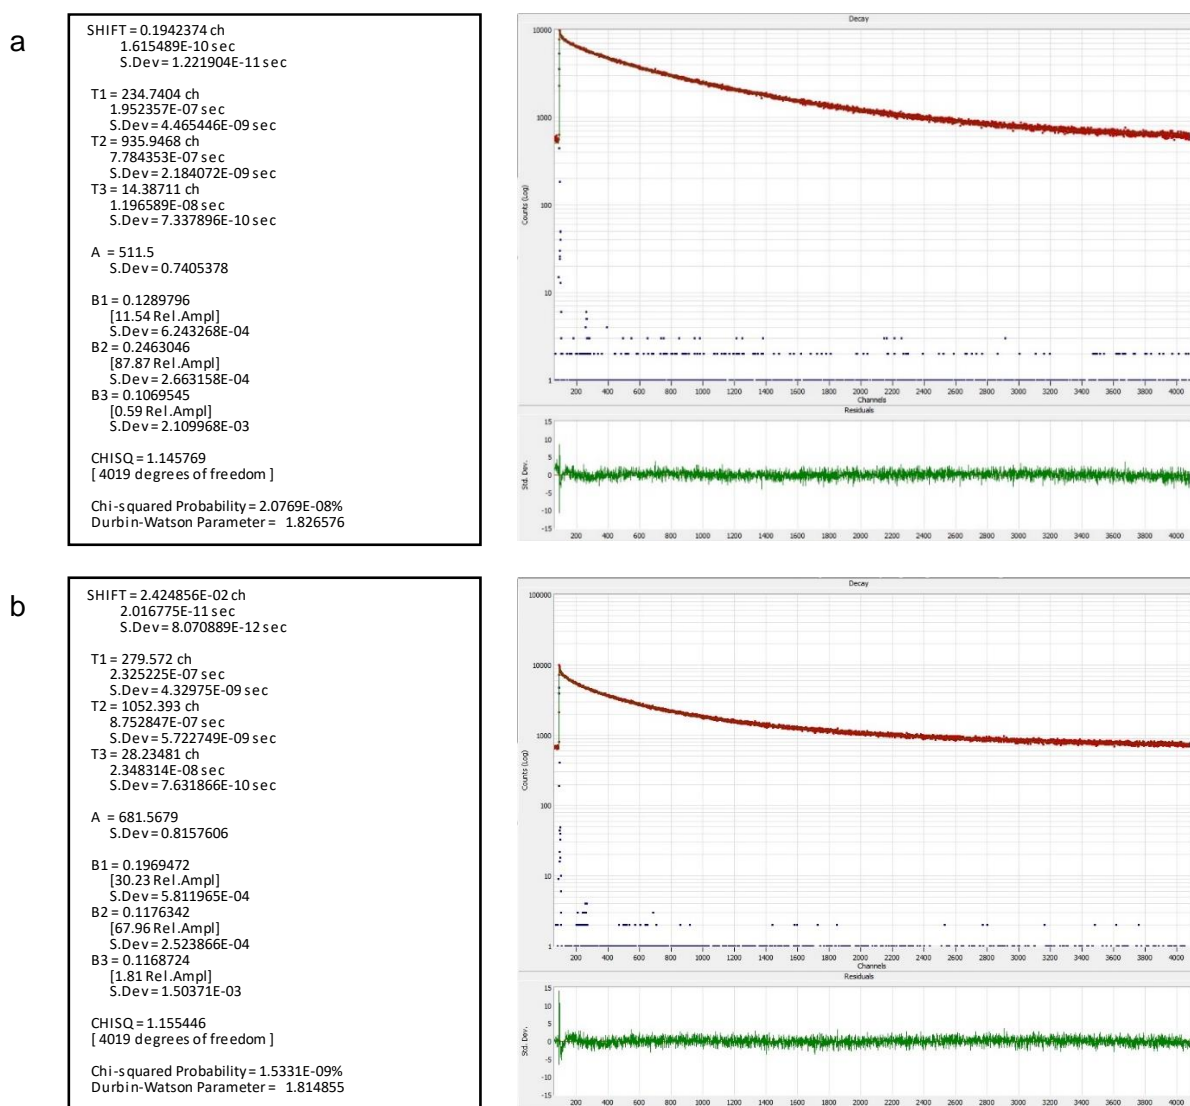

**Figure S56.** Emission decays of **Bi-Re-metaPhe** as pristine (a) and ground (b) powders.  $\lambda_{\text{ex}} = 370 \text{ nm}$ .

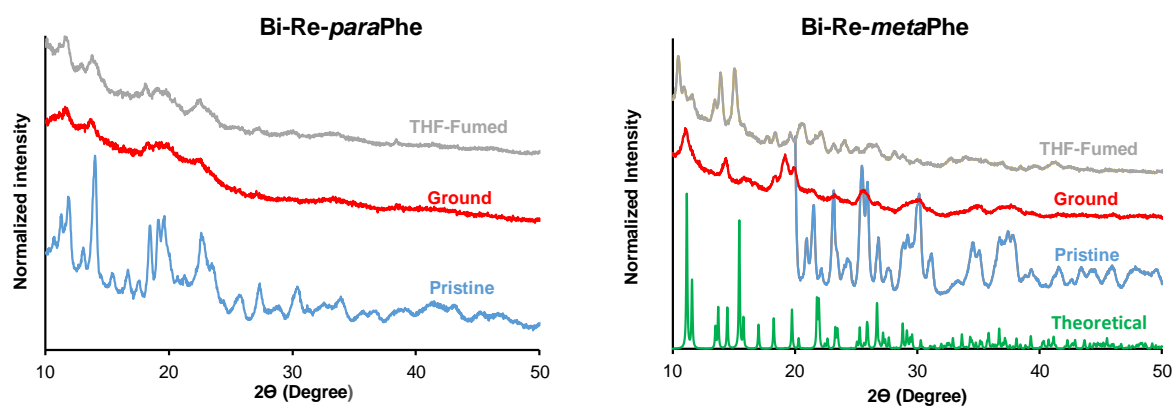

**Figure S57.** Powder XRD patterns of the pristine, ground and THF-fumed powders of **Bi-Re-paraPhe** (left) and **Bi-Re-meta-Phe** (right), and theoretical spectrum of **Bi-Re-meta-Phe** calculated from single crystal XRD analysis.

## Calculations - Annex

**Table S27.** Cartesian coordinates of complex **Re-Phe** in  $S_0$  (in dichloromethane).

|    |              |             |              |
|----|--------------|-------------|--------------|
| 75 | 11.148231000 | 5.511105000 | 9.662202000  |
| 17 | 12.737539000 | 3.596970000 | 9.323474000  |
| 8  | 9.825361000  | 4.105298000 | 12.045186000 |
| 8  | 13.059174000 | 6.946895000 | 11.575919000 |
| 8  | 9.165347000  | 7.816154000 | 9.927135000  |
| 7  | 10.017780000 | 4.528709000 | 8.031142000  |
| 7  | 11.991053000 | 6.238698000 | 7.821001000  |
| 7  | 12.987636000 | 7.104266000 | 7.544732000  |
| 7  | 12.215840000 | 6.254098000 | 5.664741000  |
| 6  | 10.324618000 | 4.638141000 | 11.153914000 |
| 6  | 12.333801000 | 6.402718000 | 10.867200000 |
| 6  | 9.917447000  | 6.944603000 | 9.820863000  |
| 6  | 9.003694000  | 3.681015000 | 8.222518000  |
| 1  | 8.709935000  | 3.507568000 | 9.249960000  |
| 6  | 8.348452000  | 3.047379000 | 7.177426000  |
| 1  | 7.531837000  | 2.369701000 | 7.392789000  |
| 6  | 8.759622000  | 3.300514000 | 5.878294000  |
| 1  | 8.270321000  | 2.822768000 | 5.037455000  |
| 6  | 9.812177000  | 4.179228000 | 5.663839000  |
| 1  | 10.155246000 | 4.398374000 | 4.661738000  |
| 6  | 10.419347000 | 4.774736000 | 6.760600000  |
| 6  | 11.518754000 | 5.723257000 | 6.702346000  |
| 6  | 13.111543000 | 7.102033000 | 6.244762000  |
| 1  | 13.820826000 | 7.683149000 | 5.675912000  |
| 6  | 12.092757000 | 6.002803000 | 4.257373000  |
| 6  | 12.792998000 | 4.941677000 | 3.696548000  |
| 1  | 13.413789000 | 4.310235000 | 4.322621000  |
| 6  | 12.678354000 | 4.710631000 | 2.330944000  |
| 1  | 13.218763000 | 3.885720000 | 1.880240000  |
| 6  | 11.877885000 | 5.536056000 | 1.547244000  |
| 1  | 11.792750000 | 5.351894000 | 0.481765000  |
| 6  | 11.189198000 | 6.598639000 | 2.123640000  |
| 1  | 10.568732000 | 7.243883000 | 1.511798000  |
| 6  | 11.293633000 | 6.839532000 | 3.488576000  |
| 1  | 10.762528000 | 7.661623000 | 3.955431000  |

**Table S28.** Cartesian coordinates of complex **Re-Phe** in  $S_1$  (in dichloromethane).

|    |              |             |              |
|----|--------------|-------------|--------------|
| 75 | 11.208587000 | 5.457224000 | 9.620140000  |
| 17 | 12.790177000 | 3.655204000 | 9.488396000  |
| 8  | 9.945396000  | 4.251990000 | 12.179908000 |
| 8  | 12.977534000 | 7.028262000 | 11.607490000 |
| 8  | 9.013698000  | 7.638022000 | 9.590377000  |
| 7  | 10.105764000 | 4.424181000 | 8.080760000  |
| 7  | 12.002181000 | 6.213802000 | 7.822773000  |
| 7  | 12.959875000 | 7.131799000 | 7.533521000  |
| 7  | 12.151307000 | 6.299531000 | 5.648252000  |
| 6  | 10.405539000 | 4.680740000 | 11.225733000 |
| 6  | 12.326862000 | 6.443659000 | 10.872181000 |
| 6  | 9.828433000  | 6.840816000 | 9.603167000  |
| 6  | 9.123441000  | 3.523873000 | 8.276158000  |
| 1  | 8.898197000  | 3.288961000 | 9.310378000  |
| 6  | 8.429347000  | 2.917571000 | 7.259809000  |
| 1  | 7.655982000  | 2.197627000 | 7.493585000  |
| 6  | 8.745755000  | 3.264319000 | 5.919519000  |
| 1  | 8.205017000  | 2.818430000 | 5.092738000  |
| 6  | 9.740505000  | 4.173004000 | 5.681625000  |
| 1  | 9.995316000  | 4.456506000 | 4.668385000  |
| 6  | 10.440016000 | 4.756841000 | 6.762030000  |
| 6  | 11.482997000 | 5.699130000 | 6.686614000  |
| 6  | 13.035777000 | 7.170393000 | 6.239930000  |
| 1  | 13.709978000 | 7.789156000 | 5.667898000  |
| 6  | 12.054338000 | 6.050566000 | 4.247856000  |
| 6  | 12.504883000 | 4.838792000 | 3.732711000  |
| 1  | 12.913991000 | 4.088088000 | 4.400346000  |
| 6  | 12.423141000 | 4.611024000 | 2.364960000  |
| 1  | 12.771421000 | 3.668427000 | 1.956988000  |
| 6  | 11.908056000 | 5.591660000 | 1.521534000  |
| 1  | 11.850283000 | 5.411305000 | 0.453497000  |
| 6  | 11.470249000 | 6.802963000 | 2.046103000  |
| 1  | 11.068956000 | 7.568514000 | 1.391032000  |
| 6  | 11.536910000 | 7.036415000 | 3.415345000  |
| 1  | 11.187062000 | 7.971275000 | 3.839588000  |

**Table S29.** Cartesian coordinates of complex **Re-Phe** in  $T_1$  (in dichloromethane).

|    |              |             |              |
|----|--------------|-------------|--------------|
| 75 | 11.218812000 | 5.467410000 | 9.599836000  |
| 17 | 12.718974000 | 3.557267000 | 9.575345000  |
| 8  | 9.902876000  | 4.283565000 | 12.174040000 |
| 8  | 13.096495000 | 7.049897000 | 11.457455000 |
| 8  | 9.056638000  | 7.680033000 | 9.645034000  |
| 7  | 10.111145000 | 4.394557000 | 8.079488000  |
| 7  | 11.956717000 | 6.216486000 | 7.835728000  |
| 7  | 12.883251000 | 7.170670000 | 7.542643000  |
| 7  | 12.085160000 | 6.326192000 | 5.647893000  |
| 6  | 10.379565000 | 4.700624000 | 11.226005000 |
| 6  | 12.391972000 | 6.459118000 | 10.774769000 |
| 6  | 9.859453000  | 6.870067000 | 9.625186000  |
| 6  | 9.167015000  | 3.464377000 | 8.287048000  |
| 1  | 8.968574000  | 3.214007000 | 9.323218000  |
| 6  | 8.469835000  | 2.842698000 | 7.275337000  |
| 1  | 7.725276000  | 2.095606000 | 7.518373000  |
| 6  | 8.743916000  | 3.212535000 | 5.934895000  |
| 1  | 8.194856000  | 2.760298000 | 5.116587000  |
| 6  | 9.706705000  | 4.148910000 | 5.681824000  |
| 1  | 9.930219000  | 4.451195000 | 4.666769000  |
| 6  | 10.416857000 | 4.739629000 | 6.758170000  |
| 6  | 11.433691000 | 5.695378000 | 6.678325000  |
| 6  | 12.946967000 | 7.219351000 | 6.252212000  |
| 1  | 13.601927000 | 7.860937000 | 5.682185000  |
| 6  | 12.024149000 | 6.073162000 | 4.248322000  |
| 6  | 12.398964000 | 4.826381000 | 3.754667000  |
| 1  | 12.721725000 | 4.048877000 | 4.438797000  |
| 6  | 12.358013000 | 4.598921000 | 2.385312000  |
| 1  | 12.647728000 | 3.629296000 | 1.995226000  |
| 6  | 11.962020000 | 5.613074000 | 1.517485000  |
| 1  | 11.936837000 | 5.432096000 | 0.448333000  |
| 6  | 11.601887000 | 6.858595000 | 2.020548000  |
| 1  | 11.292442000 | 7.650753000 | 1.347518000  |
| 6  | 11.625430000 | 7.093009000 | 3.390815000  |
| 1  | 11.330875000 | 8.055100000 | 3.795941000  |

**Table S30.** Cartesian coordinates of complex **Mono-Re-Phe** in  $S_0$  (in dichloromethane).

|    |              |              |              |
|----|--------------|--------------|--------------|
| 6  | -3.056002000 | -1.054840000 | -1.861291000 |
| 6  | -2.104915000 | -2.945839000 | -0.204831000 |
| 6  | -4.384954000 | -1.654102000 | 0.404815000  |
| 6  | -3.998934000 | 1.675362000  | 0.531492000  |
| 1  | -4.870725000 | 1.035491000  | 0.583421000  |
| 6  | -4.103460000 | 3.041125000  | 0.746396000  |
| 1  | -5.070842000 | 3.473798000  | 0.968757000  |
| 6  | -2.958556000 | 3.819030000  | 0.671023000  |
| 1  | -3.002508000 | 4.889584000  | 0.834516000  |
| 6  | -1.746613000 | 3.208529000  | 0.381684000  |
| 1  | -0.836425000 | 3.788935000  | 0.315621000  |
| 6  | -1.720229000 | 1.835487000  | 0.177632000  |
| 6  | -0.539210000 | 1.052483000  | -0.143469000 |
| 6  | 1.407254000  | 0.213114000  | -0.622219000 |
| 6  | 2.864602000  | 0.119632000  | -0.890878000 |
| 1  | 3.396753000  | 0.521216000  | -0.020904000 |
| 1  | 3.108182000  | 0.789148000  | -1.725598000 |
| 6  | 3.328410000  | -1.298563000 | -1.204702000 |
| 1  | 3.112582000  | -1.948537000 | -0.349304000 |
| 1  | 2.739019000  | -1.686720000 | -2.041285000 |
| 6  | 4.812751000  | -1.376843000 | -1.550732000 |
| 1  | 5.021058000  | -0.731697000 | -2.415180000 |
| 1  | 5.033226000  | -2.400364000 | -1.877663000 |
| 6  | 5.756437000  | -1.014795000 | -0.408348000 |
| 1  | 5.610773000  | 0.032269000  | -0.111290000 |
| 1  | 5.498353000  | -1.620870000 | 0.469721000  |
| 6  | 7.223103000  | -1.220651000 | -0.771565000 |
| 1  | 7.439435000  | -0.666266000 | -1.693914000 |
| 1  | 7.389134000  | -2.278051000 | -1.014612000 |
| 6  | 8.210327000  | -0.770972000 | 0.304954000  |
| 1  | 8.083753000  | 0.306774000  | 0.471813000  |
| 1  | 9.230980000  | -0.901253000 | -0.078111000 |
| 6  | 8.096559000  | -1.493745000 | 1.647560000  |
| 1  | 8.823985000  | -1.051770000 | 2.338741000  |
| 1  | 7.111722000  | -1.303047000 | 2.090831000  |
| 6  | 8.335298000  | -2.996385000 | 1.565945000  |
| 1  | 7.575416000  | -3.497144000 | 0.958144000  |
| 1  | 8.313170000  | -3.454339000 | 2.559240000  |
| 1  | 9.311857000  | -3.215617000 | 1.120046000  |
| 6  | 1.384081000  | 2.678347000  | -0.221671000 |
| 1  | 1.511600000  | 3.461999000  | -1.362520000 |
| 1  | 1.133452000  | 3.100897000  | -2.312709000 |
| 6  | 2.122032000  | 4.706383000  | -1.259390000 |
| 1  | 2.225364000  | 5.327462000  | -2.142194000 |
| 6  | 2.596595000  | 5.151661000  | -0.029584000 |
| 1  | 3.071469000  | 6.123897000  | 0.046180000  |
| 6  | 2.466006000  | 4.354186000  | 1.103088000  |
| 1  | 2.837639000  | 4.700736000  | 2.060983000  |
| 6  | 1.858482000  | 3.107436000  | 1.012445000  |
| 1  | 1.747150000  | 2.473511000  | 1.885412000  |
| 7  | -2.839310000 | 1.074444000  | 0.252032000  |
| 7  | -0.654710000 | -0.245656000 | -0.326963000 |
| 7  | 0.548370000  | -0.777524000 | -0.626333000 |
| 7  | 0.764746000  | 1.389906000  | -0.322922000 |
| 8  | -3.341615000 | -1.028162000 | -2.981555000 |
| 8  | -1.785597000 | -4.046168000 | -0.316546000 |
| 8  | -5.461349000 | -1.972848000 | 0.665607000  |
| 17 | -1.955705000 | -1.054667000 | 2.405516000  |
| 75 | -2.599682000 | -1.109036000 | -0.022402000 |

**Table S31.** Cartesian coordinates of complex **Mono-Re-Phe** in  $S_1$  (in dichloromethane).

|    |              |              |              |
|----|--------------|--------------|--------------|
| 6  | -2.997538000 | -0.755742000 | -1.895557000 |
| 6  | -2.179591000 | -2.943046000 | -0.298786000 |
| 6  | -4.431857000 | -1.699006000 | 0.267732000  |
| 6  | -4.005690000 | 1.670989000  | 0.650997000  |
| 1  | -4.876422000 | 1.032331000  | 0.749153000  |
| 6  | -4.111042000 | 3.023473000  | 0.851342000  |
| 1  | -5.069917000 | 3.453336000  | 1.110417000  |
| 6  | -2.946690000 | 3.826907000  | 0.710343000  |
| 1  | -2.995954000 | 4.899820000  | 0.855302000  |
| 6  | -1.759344000 | 3.227561000  | 0.388141000  |
| 1  | -0.858201000 | 3.817143000  | 0.274414000  |
| 6  | -1.699072000 | 1.829271000  | 0.199166000  |
| 6  | -0.560534000 | 1.063659000  | -0.120274000 |
| 6  | 1.388297000  | 0.166001000  | -0.607351000 |
| 6  | 2.843738000  | 0.065805000  | -0.887525000 |
| 1  | 3.385152000  | 0.509042000  | -0.043462000 |
| 1  | 3.077302000  | 0.698474000  | -1.754041000 |
| 6  | 3.314653000  | -1.361015000 | -1.143776000 |
| 1  | 3.116973000  | -1.973226000 | -0.256455000 |
| 1  | 2.715049000  | -1.791387000 | -1.952061000 |
| 6  | 4.793948000  | -1.446695000 | -1.509762000 |
| 1  | 4.984554000  | -0.838118000 | -2.404398000 |
| 1  | 5.017085000  | -2.482015000 | -1.795767000 |
| 6  | 5.753483000  | -1.029518000 | -0.399808000 |
| 1  | 5.601306000  | 0.027071000  | -0.142709000 |
| 1  | 5.516653000  | -1.602016000 | 0.506413000  |
| 6  | 7.215957000  | -1.235190000 | -0.779602000 |
| 1  | 7.411065000  | -0.714795000 | -1.726190000 |
| 1  | 7.389122000  | -2.299513000 | -0.984689000 |
| 6  | 8.216507000  | -0.734621000 | 0.261608000  |
| 1  | 8.079949000  | 0.347068000  | 0.390721000  |
| 1  | 9.231868000  | -0.867501000 | -0.134482000 |
| 6  | 8.134968000  | -1.408145000 | 1.631915000  |
| 1  | 8.868450000  | -0.931999000 | 2.293379000  |
| 1  | 7.155505000  | -1.212938000 | 2.084993000  |
| 6  | 8.391399000  | -2.909784000 | 1.601868000  |
| 1  | 7.627738000  | -3.441986000 | 1.026381000  |
| 1  | 8.392063000  | -3.330691000 | 2.611686000  |
| 1  | 9.362945000  | -3.133630000 | 1.147374000  |
| 6  | 1.393767000  | 2.643190000  | -0.235321000 |
| 6  | 1.547210000  | 3.409896000  | -1.385395000 |
| 1  | 1.176619000  | 3.036462000  | -2.333963000 |
| 6  | 2.170459000  | 4.649478000  | -1.298049000 |
| 1  | 2.293239000  | 5.253018000  | -2.190752000 |
| 6  | 2.632233000  | 5.113404000  | -0.070303000 |
| 1  | 3.116883000  | 6.081752000  | -0.005468000 |
| 6  | 2.475050000  | 4.338018000  | 1.074479000  |
| 1  | 2.836169000  | 4.698524000  | 2.031500000  |
| 6  | 1.855004000  | 3.096493000  | 0.996184000  |
| 1  | 1.722857000  | 2.480793000  | 1.879381000  |
| 7  | -2.854440000 | 1.046355000  | 0.332975000  |
| 7  | -0.674549000 | -0.268848000 | -0.279816000 |
| 7  | 0.533597000  | -0.814278000 | -0.585238000 |
| 7  | 0.760432000  | 1.367034000  | -0.321305000 |
| 8  | -3.238061000 | -0.564763000 | -2.993746000 |
| 8  | -1.933967000 | -4.045417000 | -0.476320000 |
| 8  | -5.494653000 | -2.094951000 | 0.409608000  |
| 17 | -2.141830000 | -1.239944000 | 2.346455000  |
| 75 | -2.600113000 | -1.065222000 | -0.008630000 |

**Table S32.** Cartesian coordinates of complex **Mono-Re-Phe** in  $T_1$  (in dichloromethane).

|    |              |              |              |
|----|--------------|--------------|--------------|
| 6  | 2.878784000  | -0.854071000 | 1.927342000  |
| 6  | 2.033275000  | -2.922600000 | 0.257093000  |
| 6  | 4.427203000  | -1.692986000 | -0.181386000 |
| 6  | 4.001413000  | 1.645140000  | -0.660651000 |
| 1  | 4.866749000  | 0.998639000  | -0.755499000 |
| 6  | 4.120466000  | 3.001246000  | -0.871473000 |
| 1  | 5.083577000  | 3.419096000  | -1.135133000 |
| 6  | 2.967409000  | 3.816238000  | -0.734502000 |
| 1  | 3.030216000  | 4.887871000  | -0.886488000 |
| 6  | 1.773856000  | 3.235603000  | -0.410162000 |
| 1  | 0.877827000  | 3.833701000  | -0.301051000 |
| 6  | 1.701873000  | 1.832317000  | -0.213673000 |
| 6  | 0.567410000  | 1.080339000  | 0.096833000  |
| 6  | -1.380974000 | 0.168769000  | 0.582220000  |
| 6  | -2.835029000 | 0.074383000  | 0.858861000  |
| 1  | -3.370486000 | 0.503649000  | 0.003318000  |
| 1  | -3.068149000 | 0.728987000  | 1.709309000  |
| 6  | -3.310792000 | -1.345215000 | 1.143664000  |
| 1  | -3.110167000 | -1.976879000 | 0.270956000  |
| 1  | -2.716754000 | -1.758935000 | 1.964584000  |
| 6  | -4.792317000 | -1.417933000 | 1.503264000  |
| 1  | -4.985869000 | -0.789664000 | 2.383482000  |
| 1  | -5.019769000 | -2.446171000 | 1.810329000  |
| 6  | -5.744166000 | -1.022216000 | 0.378972000  |
| 1  | -5.588340000 | 0.028465000  | 0.100529000  |
| 1  | -5.503340000 | -1.614221000 | -0.513520000 |
| 6  | -2.209259000 | -1.216782000 | 0.754553000  |
| 1  | -7.408527000 | -0.676767000 | 1.689195000  |
| 1  | -7.385958000 | -2.276330000 | 0.980227000  |
| 6  | -8.202603000 | -0.735296000 | -0.302415000 |
| 1  | -8.063444000 | 0.343417000  | -0.452016000 |
| 1  | -9.220518000 | -0.858728000 | 0.090122000  |
| 6  | -8.113910000 | -1.435921000 | -1.658600000 |
| 1  | -8.842702000 | -0.971923000 | -2.333724000 |
| 1  | -7.131472000 | -1.251088000 | -2.109592000 |
| 6  | -8.372789000 | -2.936310000 | -1.600338000 |
| 1  | -7.613500000 | -3.458027000 | -1.009659000 |
| 1  | -8.367846000 | -3.377186000 | -2.601576000 |
| 1  | -9.347453000 | -3.149725000 | -1.147516000 |
| 6  | -1.386823000 | 2.653638000  | 0.219311000  |
| 6  | -1.533838000 | 3.418087000  | 1.371905000  |
| 1  | -1.158135000 | 3.043020000  | 2.317818000  |
| 6  | -2.157844000 | 4.657593000  | 1.290092000  |
| 1  | -2.275955000 | 5.259459000  | 2.184526000  |
| 6  | -2.626496000 | 5.123465000  | 0.065678000  |
| 1  | -3.111854000 | 6.091736000  | 0.005317000  |
| 6  | -2.475396000 | 4.350449000  | -1.081505000 |
| 1  | -2.841875000 | 4.712679000  | -2.035812000 |
| 6  | -1.854580000 | 3.108993000  | -1.009107000 |
| 1  | -1.727248000 | 2.495115000  | -1.894293000 |
| 7  | 2.850400000  | 1.039085000  | -0.335250000 |
| 7  | 0.679776000  | -0.280484000 | 0.248079000  |
| 7  | -0.534689000 | -0.815318000 | 0.557961000  |
| 7  | -0.752338000 | 1.377615000  | 0.299262000  |
| 8  | 3.081480000  | -0.725186000 | 3.043915000  |
| 8  | 1.708284000  | -4.013058000 | 0.394447000  |
| 8  | 5.501535000  | -2.063781000 | -0.278859000 |
| 17 | 2.338551000  | -1.251403000 | -2.405333000 |
| 75 | 2.551519000  | -1.077573000 | 0.020461000  |

**Table S33.** Cartesian coordinates of complex **Bi-Re-metaPhe** in  $S_0$  (in dichloromethane).

|    |              |               |              |    |              |              |              |
|----|--------------|---------------|--------------|----|--------------|--------------|--------------|
| 6  | 5.227982000  | 1.091383000   | 2.503147000  | 6  | -4.688471000 | -3.748588000 | -0.097037000 |
| 6  | 7.034014000  | -0.497088000  | 1.302699000  | 1  | -5.584984000 | -4.107397000 | 0.392377000  |
| 6  | 7.340693000  | 2.173749000   | 1.229205000  | 6  | -3.796805000 | -4.632432000 | -0.685934000 |
| 6  | 4.688945000  | 3.748553000   | -0.096975000 | 1  | -4.000008000 | -5.695507000 | -0.654344000 |
| 1  | 5.585557000  | 4.107260000   | 0.392334000  | 6  | -2.664734000 | -4.126251000 | -1.304640000 |
| 6  | 3.797291000  | 4.632500000   | -0.685735000 | 1  | -1.947360000 | -4.786649000 | -1.778026000 |
| 1  | 4.000609000  | 5.695553000   | -0.654158000 | 6  | -2.458300000 | -2.754051000 | -1.312444000 |
| 6  | 2.665072000  | 4.126447000   | -1.304277000 | 1  | -1.585096000 | -2.333101000 | -1.791287000 |
| 1  | 1.947691000  | 4.786929000   | -1.777532000 | 6  | -3.393478000 | -1.931524000 | -0.699522000 |
| 6  | 2.458498000  | 2.754268000   | -1.312085000 | 6  | -3.316349000 | -0.483120000 | -0.609322000 |
| 1  | 1.585164000  | 2.333423000   | -1.790783000 | 6  | -2.864332000 | 1.646667000  | -0.635434000 |
| 6  | 3.393690000  | 1.931632000   | -0.699329000 | 6  | -2.154001000 | 2.924675000  | -0.893936000 |
| 6  | 3.316429000  | 0.483234000   | -0.609154000 | 1  | -1.971701000 | 3.009558000  | -1.972400000 |
| 6  | 2.864221000  | -1.646509000  | -0.635317000 | 1  | -1.163105000 | 2.871213000  | -0.425276000 |
| 6  | 2.153767000  | -2.924447000  | -0.893829000 | 6  | -2.904761000 | 4.150304000  | -0.389310000 |
| 1  | 1.971483000  | -3.009323000  | -1.972299000 | 1  | -3.887219000 | 4.198927000  | -0.871385000 |
| 6  | 2.904363000  | -4.150153000  | -0.389154000 | 1  | -3.092387000 | 4.045398000  | 0.684690000  |
| 6  | 2.132369000  | -5.435957000  | -0.655461000 | 6  | -2.132863000 | 5.436191000  | -0.655490000 |
| 1  | 1.939722000  | -5.529909000  | -1.732691000 | 1  | -1.940147000 | 5.530221000  | -1.732701000 |
| 1  | 1.147838000  | -5.376258000  | -0.171934000 | 1  | -1.148363000 | 5.376563000  | -0.171893000 |
| 6  | 2.859361000  | -6.681038000  | -0.163784000 | 6  | -2.860019000 | 6.681172000  | -0.163799000 |
| 1  | 3.841832000  | -6.742782000  | -0.650696000 | 1  | -3.842487000 | 6.742800000  | -0.650734000 |
| 1  | 3.057690000  | -6.583453000  | 0.912010000  | 1  | -3.058362000 | 6.583541000  | 0.911987000  |
| 6  | 2.088562000  | -7.970305000  | -0.418759000 | 6  | -2.089384000 | 7.970545000  | -0.418735000 |
| 1  | 1.106645000  | -7.907866000  | 0.070131000  | 1  | -1.107444000 | 7.908206000  | 0.070122000  |
| 1  | 1.887539000  | -8.065738000  | -1.494629000 | 1  | -1.888406000 | 8.066051000  | -1.494608000 |
| 6  | 2.813676000  | -9.218118000  | 0.069106000  | 6  | -2.814640000 | 9.218246000  | 0.069205000  |
| 1  | 3.016668000  | -9.122875000  | 1.144680000  | 1  | -3.017603000 | 9.122924000  | 1.144778000  |
| 1  | 3.795140000  | -9.282375000  | -0.420511000 | 1  | -3.796120000 | 9.282408000  | -0.420392000 |
| 6  | 2.042921000  | -10.508407000 | -0.182712000 | 6  | -2.044046000 | 10.508641000 | -0.182562000 |
| 1  | 1.062818000  | -10.443545000 | 0.307159000  | 1  | -1.063923000 | 10.443871000 | 0.307282000  |
| 1  | 1.839923000  | -10.602513000 | -1.257283000 | 1  | -1.841084000 | 10.602827000 | -1.257133000 |
| 6  | 2.776626000  | -11.749064000 | 0.307859000  | 6  | -2.777889000 | 11.749184000 | 0.308091000  |
| 1  | 3.746073000  | -11.856448000 | -0.190276000 | 1  | -3.747354000 | 11.856487000 | -0.190028000 |
| 1  | 2.201415000  | -12.659462000 | 0.115051000  | 1  | -2.202784000 | 12.659659000 | 0.115333000  |
| 1  | 2.963747000  | -11.695949000 | 1.385663000  | 1  | -2.964994000 | 11.695982000 | 1.385894000  |
| 6  | 1.176028000  | -0.193598000  | -1.755418000 | 6  | -1.175966000 | 0.193932000  | -1.755494000 |
| 6  | 1.188436000  | -0.201111000  | -3.145377000 | 6  | -1.188240000 | 0.201712000  | -3.145451000 |
| 1  | 2.121209000  | -0.358405000  | -3.675249000 | 1  | -2.120964000 | 0.359099000  | -3.675384000 |
| 6  | 0.000131000  | 0.000370000   | -3.836624000 | 7  | -4.501906000 | -2.426198000 | -0.096299000 |
| 1  | 0.000182000  | 0.000475000   | -4.920115000 | 7  | -4.272605000 | 0.178208000  | 0.005566000  |
| 6  | -0.000020000 | 0.000103000   | -1.042686000 | 7  | -4.002226000 | 1.500216000  | -0.004151000 |
| 1  | -0.000053000 | 0.000016000   | 0.041371000  | 7  | -2.391531000 | 0.418730000  | -1.037529000 |
| 17 | 6.750377000  | 0.835848000   | -1.622993000 | 6  | -5.227529000 | -1.091350000 | 2.503119000  |
| 7  | 4.502245000  | 2.426182000   | -0.096239000 | 6  | -7.033914000 | 0.496795000  | 1.302787000  |
| 7  | 4.272630000  | -0.178195000  | 0.005710000  | 6  | -7.340247000 | -2.174084000 | 1.229457000  |
| 7  | 4.002127000  | -1.500177000  | -0.004027000 | 17 | -6.750394000 | -0.836274000 | -1.622861000 |
| 7  | 2.391529000  | -0.418522000  | -1.037383000 | 8  | -4.804380000 | -1.170597000 | 3.576120000  |
| 8  | 4.804974000  | 1.170759000   | 3.576194000  | 8  | -7.680501000 | 1.391827000  | 1.627514000  |
| 8  | 7.680529000  | -1.392181000  | 1.627401000  | 8  | -8.181482000 | -2.908054000 | 1.514240000  |
| 8  | 8.182054000  | 2.907619000   | 1.513874000  | 75 | -5.934823000 | -0.965219000 | 0.748543000  |
| 75 | 5.935058000  | 0.965047000   | 0.748500000  | 1  | 1.162864000  | -2.870870000 | -0.425190000 |
|    |              |               |              | 1  | 3.091861000  | -4.045295000 | 0.684886000  |
|    |              |               |              | 1  | 3.886879000  | -4.198852000 | -0.871101000 |

**Table S34.** Cartesian coordinates of complex **Bi-Re-metaPhe** in S<sub>1</sub> (in dichloromethane).

|    |              |               |              |    |              |              |              |
|----|--------------|---------------|--------------|----|--------------|--------------|--------------|
| 6  | 5.155624000  | 1.135887000   | 2.493554000  | 6  | -4.833712000 | -3.751092000 | -0.249932000 |
| 6  | 6.998815000  | -0.424073000  | 1.312541000  | 1  | -5.759897000 | -4.100530000 | 0.192253000  |
| 6  | 7.263293000  | 2.251361000   | 1.240552000  | 6  | -3.957224000 | -4.640728000 | -0.817428000 |
| 6  | 4.602918000  | 3.783077000   | -0.117940000 | 1  | -4.194100000 | -5.696633000 | -0.823799000 |
| 1  | 5.489968000  | 4.156462000   | 0.377794000  | 6  | -2.754222000 | -4.142395000 | -1.385262000 |
| 6  | 3.703877000  | 4.651846000   | -0.717858000 | 1  | -2.037304000 | -4.817317000 | -1.838434000 |
| 1  | 3.891504000  | 5.717854000   | -0.688405000 | 6  | -2.509581000 | -2.796560000 | -1.353879000 |
| 6  | 2.584858000  | 4.127125000   | -1.345024000 | 1  | -1.599207000 | -2.396596000 | -1.782018000 |
| 1  | 1.862519000  | 4.775443000   | -1.827524000 | 6  | -3.444956000 | -1.918624000 | -0.761344000 |
| 6  | 2.398150000  | 2.752139000   | -1.349668000 | 6  | -3.346938000 | -0.518486000 | -0.652587000 |
| 1  | 1.536232000  | 2.315622000   | -1.835133000 | 6  | -2.890467000 | 1.638857000  | -0.641176000 |
| 6  | 3.339409000  | 1.945454000   | -0.724909000 | 6  | -2.157176000 | 2.908132000  | -0.881673000 |
| 6  | 3.282302000  | 0.496500000   | -0.631541000 | 1  | -1.960160000 | 2.999805000  | -1.957593000 |
| 6  | 2.860730000  | -1.638408000  | -0.657968000 | 1  | -1.171064000 | 2.837588000  | -0.404218000 |
| 6  | 2.169591000  | -2.926193000  | -0.919888000 | 6  | -2.890607000 | 4.143792000  | -0.377511000 |
| 1  | 2.019064000  | -3.025895000  | -2.002020000 | 1  | -3.868224000 | 4.211290000  | -0.867407000 |
| 6  | 2.916514000  | -4.138617000  | -0.379187000 | 1  | -3.090154000 | 4.036166000  | 0.694254000  |
| 6  | 2.165886000  | -5.435063000  | -0.654901000 | 6  | -2.096984000 | 5.419519000  | -0.628752000 |
| 1  | 2.006738000  | -5.541791000  | -1.736365000 | 1  | -1.892990000 | 5.516766000  | -1.703703000 |
| 1  | 1.166588000  | -5.380755000  | -0.202195000 | 1  | -1.117605000 | 5.342125000  | -0.137189000 |
| 6  | 2.890525000  | -6.667423000  | -0.128912000 | 6  | -2.808475000 | 6.673439000  | -0.136807000 |
| 1  | 3.887951000  | -6.723433000  | -0.585252000 | 1  | -3.786638000 | 6.751755000  | -0.630172000 |
| 1  | 3.055130000  | -6.557339000  | 0.951391000  | 1  | -3.015895000 | 6.574374000  | 0.937215000  |
| 6  | 2.141307000  | -7.967317000  | -0.394102000 | 6  | -2.017550000 | 7.952611000  | -0.380836000 |
| 1  | 1.144593000  | -7.910808000  | 0.064544000  | 1  | -1.039992000 | 7.874067000  | 0.114451000  |
| 1  | 1.973525000  | -8.074985000  | -1.474485000 | 1  | -1.807641000 | 8.049526000  | -1.454892000 |
| 6  | 2.864635000  | -9.202578000  | 0.127215000  | 6  | -2.727899000 | 9.208862000  | 0.107129000  |
| 1  | 3.034616000  | -9.095006000  | 1.207362000  | 1  | -2.939264000 | 9.112502000  | 1.181017000  |
| 1  | 3.860839000  | -9.260928000  | -0.332507000 | 1  | -3.705179000 | 9.288886000  | -0.388566000 |
| 6  | 2.115289000  | -10.503443000 | -0.134635000 | 6  | -1.937433000 | 10.489098000 | -0.134686000 |
| 1  | 1.120580000  | -10.444626000 | 0.325638000  | 1  | -0.961661000 | 10.408723000 | 0.361486000  |
| 1  | 1.944940000  | -10.609686000 | -1.213728000 | 1  | -1.725854000 | 10.584198000 | -1.207513000 |
| 6  | 2.847313000  | -11.731498000 | 0.389072000  | 6  | -2.656938000 | 11.738208000 | 0.355490000  |
| 1  | 3.832013000  | -11.833046000 | -0.079516000 | 1  | -3.621370000 | 11.861008000 | -0.148799000 |
| 1  | 2.287613000  | -12.649848000 | 0.188386000  | 1  | -2.067715000 | 12.641130000 | 0.169950000  |
| 1  | 3.002261000  | -11.666286000 | 1.471323000  | 1  | -2.852128000 | 11.683874000 | 1.431812000  |
| 6  | 1.152716000  | -0.209137000  | -1.780048000 | 6  | -1.203915000 | 0.177082000  | -1.770687000 |
| 6  | 1.160061000  | -0.240589000  | -3.169345000 | 6  | -1.217480000 | 0.156412000  | -3.161637000 |
| 1  | 2.090850000  | -0.403704000  | -3.700958000 | 1  | -2.153349000 | 0.301818000  | -3.689623000 |
| 6  | -0.033106000 | -0.054544000  | -3.856883000 | 7  | -4.627076000 | -2.420797000 | -0.201193000 |
| 1  | -0.038571000 | -0.072995000  | -4.940370000 | 7  | -4.325543000 | 0.176851000  | -0.042917000 |
| 6  | -0.020707000 | -0.006335000  | -1.065358000 | 7  | -4.032707000 | 1.504669000  | -0.036746000 |
| 1  | -0.015422000 | 0.008064000   | 0.018666000  | 7  | -2.411798000 | 0.403665000  | -1.053640000 |
| 17 | 6.724711000  | 0.903443000   | -1.616433000 | 6  | -5.022952000 | -1.215539000 | 2.375335000  |
| 7  | 4.435313000  | 2.458127000   | -0.113922000 | 6  | -7.035592000 | 0.498328000  | 1.371803000  |
| 7  | 4.245144000  | -0.150062000  | -0.010757000 | 6  | -7.405447000 | -2.106050000 | 1.290654000  |
| 7  | 3.993669000  | -1.475764000  | -0.020675000 | 17 | -6.950689000 | -0.777062000 | -1.502402000 |
| 7  | 2.372828000  | -0.418190000  | -1.063349000 | 8  | -4.481295000 | -1.378535000 | 3.365215000  |
| 8  | 4.720725000  | 1.209189000   | 3.562389000  | 8  | -7.671315000 | 1.351882000  | 1.788074000  |
| 8  | 7.656431000  | -1.308449000  | 1.644460000  | 8  | -8.265362000 | -2.754811000 | 1.672444000  |
| 8  | 8.089808000  | 2.998909000   | 1.533533000  | 75 | -5.947156000 | -0.957153000 | 0.673339000  |
| 75 | 5.882336000  | 1.020028000   | 0.746416000  | 1  | 1.164799000  | -2.875750000 | -0.481654000 |
|    |              |               |              | 1  | 3.070230000  | -4.020468000 | 0.698921000  |
|    |              |               |              | 1  | 3.913724000  | -4.182651000 | -0.830457000 |

**Table S35.** Cartesian coordinates of complex **Bi-Re-*meta*Phe** in T<sub>1</sub> (in dichloromethane).

|    |              |              |              |    |              |               |              |
|----|--------------|--------------|--------------|----|--------------|---------------|--------------|
| 6  | 5.179297000  | -1.076977000 | -2.499423000 | 6  | -4.816495000 | 3.720863000   | 0.203473000  |
| 6  | 7.000129000  | 0.511375000  | -1.321584000 | 1  | -5.738961000 | 4.061726000   | -0.253171000 |
| 6  | 7.302223000  | -2.159981000 | -1.243586000 | 6  | -3.954236000 | 4.623852000   | 0.785918000  |
| 6  | 4.662579000  | -3.725945000 | 0.116119000  | 1  | -4.203035000 | 5.677241000   | 0.787396000  |
| 1  | 5.554639000  | -4.087800000 | -0.379165000 | 6  | -2.757012000 | 4.140662000   | 1.371642000  |
| 6  | 3.775280000  | -4.606192000 | 0.716779000  | 1  | -2.055128000 | 4.825937000   | 1.833590000  |
| 1  | 3.977310000  | -5.669590000 | 0.688467000  | 6  | -2.496747000 | 2.799419000   | 1.351317000  |
| 6  | 2.649065000  | -4.096016000 | 1.343027000  | 1  | -1.591161000 | 2.407721000   | 1.796839000  |
| 1  | 1.935368000  | -4.753558000 | 1.825898000  | 6  | -3.421012000 | 1.909380000   | 0.745452000  |
| 6  | 2.443836000  | -2.723664000 | 1.346273000  | 6  | -3.323000000 | 0.519888000   | 0.654184000  |
| 1  | 1.575785000  | -2.298628000 | 1.830935000  | 6  | -2.889577000 | -1.647345000  | 0.660905000  |
| 6  | 3.374354000  | -1.904888000 | 0.721154000  | 6  | -2.162633000 | -2.913638000  | 0.922344000  |
| 6  | 3.297721000  | -0.456912000 | 0.626046000  | 1  | -1.991909000 | -2.998651000  | 2.003573000  |
| 6  | 2.847496000  | 1.672326000  | 0.649537000  | 1  | -1.164281000 | -2.837874000  | 0.471260000  |
| 6  | 2.139580000  | 2.951262000  | 0.909969000  | 6  | -2.878224000 | -4.153325000  | 0.403194000  |
| 1  | 1.971848000  | 3.041988000  | 1.990315000  | 1  | -3.867296000 | -4.223720000  | 0.868813000  |
| 6  | 2.882156000  | 4.174671000  | 0.388293000  | 1  | -3.050763000 | -4.049238000  | -0.673527000 |
| 6  | 2.113661000  | 5.461592000  | 0.659323000  | 6  | -2.085208000 | -5.424517000  | 0.678396000  |
| 1  | 1.936432000  | 5.560636000  | 1.738711000  | 1  | -1.907717000 | -5.517470000  | 1.758358000  |
| 1  | 1.122239000  | 5.399323000  | 0.190605000  | 1  | -1.094346000 | -5.344193000  | 0.210956000  |
| 6  | 2.833365000  | 6.704368000  | 0.151371000  | 6  | -2.779071000 | -6.682846000  | 0.172768000  |
| 1  | 3.822804000  | 6.768486000  | 0.623743000  | 1  | -3.768355000 | -6.764426000  | 0.642810000  |
| 1  | 3.016175000  | 6.601800000  | -0.926739000 | 1  | -2.961084000 | -6.587465000  | -0.906154000 |
| 6  | 2.066238000  | 7.994834000  | 0.411346000  | 6  | -1.988173000 | -7.957559000  | 0.439156000  |
| 1  | 1.077424000  | 7.930075000  | -0.063050000 | 1  | -0.999713000 | -7.875880000  | -0.033451000 |
| 1  | 1.880573000  | 8.095191000  | 1.489509000  | 1  | -1.802995000 | -8.050358000  | 1.518098000  |
| 6  | 2.784287000  | 9.240355000  | -0.092562000 | 6  | -2.681210000 | -9.218480000  | -0.061487000 |
| 1  | 2.972087000  | 9.140091000  | -1.170457000 | 1  | -2.868546000 | -9.125912000  | -1.140150000 |
| 1  | 3.772586000  | 9.306941000  | 0.382835000  | 1  | -3.669086000 | -9.302036000  | 0.412099000  |
| 6  | 2.017115000  | 10.531842000 | 0.164027000  | 6  | -1.890175000 | -10.494152000 | 0.201671000  |
| 1  | 1.030265000  | 10.464735000 | -0.311772000 | 1  | -0.903824000 | -10.410232000 | -0.272505000 |
| 1  | 1.829118000  | 10.630885000 | 1.240875000  | 1  | -1.702510000 | -10.585409000 | 1.279268000  |
| 6  | 2.743871000  | 11.770214000 | -0.342434000 | 6  | -2.592282000 | -11.748067000 | -0.301288000 |
| 1  | 3.720125000  | 11.879915000 | 0.141731000  | 1  | -3.567276000 | -11.874333000 | 0.181363000  |
| 1  | 2.171341000  | 12.681536000 | -0.145959000 | 1  | -2.002994000 | -12.647564000 | -0.100002000 |
| 1  | 2.916084000  | 11.712048000 | -1.422474000 | 1  | -2.763288000 | -11.697492000 | -1.381895000 |
| 6  | 1.162505000  | 0.222245000  | 1.779949000  | 6  | -1.191328000 | -0.180935000  | 1.781862000  |
| 6  | 1.178105000  | 0.240219000  | 3.169586000  | 6  | -1.196464000 | -0.174151000  | 3.173017000  |
| 1  | 2.110967000  | 0.405585000  | 3.696907000  | 1  | -2.127894000 | -0.330674000  | 3.705649000  |
| 6  | -0.009067000 | 0.038261000  | 3.862774000  | 7  | -4.593666000 | 2.399624000   | 0.157624000  |
| 1  | -0.007856000 | 0.046339000  | 4.946391000  | 7  | -4.321559000 | -0.190282000  | 0.036554000  |
| 6  | -0.013760000 | 0.017594000  | 1.070713000  | 7  | -4.023873000 | -1.519914000  | 0.046089000  |
| 1  | -0.014979000 | 0.012546000  | -0.013418000 | 7  | -2.402391000 | -0.406960000  | 1.069802000  |
| 17 | 6.744238000  | -0.813325000 | 1.610255000  | 6  | -4.944553000 | 1.033989000   | -2.433741000 |
| 7  | 4.477102000  | -2.403384000 | 0.110746000  | 6  | -6.922801000 | -0.608749000  | -1.341922000 |
| 7  | 4.250716000  | 0.201552000  | 0.002652000  | 6  | -7.290076000 | 2.087215000   | -1.462753000 |
| 7  | 3.981419000  | 1.523745000  | 0.010688000  | 17 | -7.070794000 | 0.952336000   | 1.396225000  |
| 7  | 2.376733000  | 0.446292000  | 1.057968000  | 8  | -4.403178000 | 1.120886000   | -3.435003000 |
| 8  | 4.745667000  | -1.158739000 | -3.568140000 | 8  | -7.531205000 | -1.513347000  | -1.694179000 |
| 8  | 7.645260000  | 1.404193000  | -1.655344000 | 8  | -8.102068000 | 2.754758000   | -1.904632000 |
| 8  | 8.139186000  | -2.896530000 | -1.534684000 | 75 | -5.880848000 | 0.897956000   | -0.728811000 |
| 75 | 5.903997000  | -0.947065000 | -0.752402000 | 1  | 1.142058000  | 2.893905000   | 0.456121000  |
|    |              |              |              | 1  | 3.054180000  | 4.064551000   | -0.687859000 |
|    |              |              |              | 1  | 3.871596000  | 4.226312000   | 0.855640000  |



**Table S36.** Cartesian coordinates of complex **Bi-Re-paraPhe** in  $S_0$  (in dichloromethane).

|    |              |               |              |
|----|--------------|---------------|--------------|
| 6  | -6.907705000 | 1.416246000   | -1.913533000 |
| 6  | -7.975012000 | 0.027765000   | 0.125792000  |
| 6  | -8.031433000 | 2.716964000   | 0.162671000  |
| 6  | -4.978760000 | 4.082907000   | -0.126767000 |
| 1  | -5.975258000 | 4.505904000   | -0.137522000 |
| 6  | -3.858143000 | 4.899720000   | -0.127793000 |
| 1  | -3.981749000 | 5.975319000   | -0.139619000 |
| 6  | -2.603069000 | 4.311925000   | -0.112867000 |
| 1  | -1.704982000 | 4.918766000   | -0.112690000 |
| 6  | -2.507784000 | 2.927617000   | -0.099417000 |
| 1  | -1.541073000 | 2.443305000   | -0.089738000 |
| 6  | -3.674211000 | 2.175092000   | -0.098953000 |
| 6  | -3.744761000 | 0.723608000   | -0.099482000 |
| 6  | -3.476512000 | -1.436800000  | -0.118096000 |
| 6  | -2.816346000 | -2.766940000  | -0.119581000 |
| 1  | -2.128535000 | -2.814451000  | 0.733695000  |
| 6  | -3.797847000 | -3.930903000  | -0.068506000 |
| 6  | -3.082744000 | -5.275790000  | -0.069682000 |
| 1  | -2.401230000 | -5.327176000  | 0.790155000  |
| 1  | -2.452245000 | -5.353004000  | -0.965726000 |
| 6  | -4.039859000 | -6.460039000  | -0.024501000 |
| 1  | -4.672564000 | -6.380495000  | 0.869673000  |
| 1  | -4.720298000 | -6.408743000  | -0.885059000 |
| 6  | -3.331602000 | -7.809016000  | -0.021869000 |
| 1  | -2.697454000 | -7.887145000  | -0.915615000 |
| 1  | -2.651379000 | -7.859347000  | 0.839402000  |
| 6  | -4.285755000 | -8.995818000  | 0.022026000  |
| 1  | -4.965950000 | -8.946848000  | -0.839412000 |
| 1  | -4.920993000 | -8.918037000  | 0.915094000  |
| 6  | -3.579193000 | -10.346036000 | 0.026139000  |
| 1  | -2.944770000 | -10.422999000 | -0.866246000 |
| 1  | -2.899881000 | -10.394106000 | 0.886951000  |
| 6  | -4.541810000 | -11.524866000 | 0.070240000  |
| 1  | -5.166025000 | -11.490601000 | 0.969509000  |
| 1  | -4.008641000 | -12.480167000 | 0.072188000  |
| 1  | -5.211469000 | -11.519556000 | -0.796379000 |
| 17 | -6.191014000 | 1.407246000   | 2.434073000  |
| 7  | -4.901718000 | 2.749667000   | -0.113201000 |
| 7  | -4.920157000 | 0.133578000   | -0.125478000 |
| 7  | -4.765633000 | -1.206643000  | -0.138610000 |
| 7  | -2.789517000 | -0.245134000  | -0.093707000 |
| 8  | -7.070528000 | 1.429139000   | -3.058110000 |
| 8  | -8.753240000 | -0.814549000  | 0.223323000  |
| 8  | -8.852998000 | 3.515531000   | 0.283989000  |
| 75 | -6.654756000 | 1.400291000   | -0.034684000 |
| 6  | 4.979605000  | -4.082948000  | 0.125363000  |
| 1  | 5.976166000  | -4.505779000  | 0.136546000  |
| 6  | 3.859125000  | -4.899948000  | 0.126287000  |
| 1  | 3.982899000  | -5.975525000  | 0.138457000  |
| 6  | 2.603954000  | -4.312373000  | 0.110796000  |
| 1  | 1.705975000  | -4.919374000  | 0.110524000  |
| 6  | 2.508425000  | -2.928088000  | 0.096922000  |

|    |              |              |              |
|----|--------------|--------------|--------------|
| 1  | 1.541633000  | -2.443948000 | 0.086785000  |
| 6  | 3.674730000  | -2.175368000 | 0.096592000  |
| 6  | 3.745030000  | -0.723863000 | 0.096635000  |
| 6  | 3.476391000  | 1.436503000  | 0.113841000  |
| 6  | 2.815930000  | 2.766491000  | 0.113998000  |
| 1  | 2.182075000  | 2.840755000  | 1.006603000  |
| 1  | 2.133114000  | 2.815409000  | -0.743233000 |
| 6  | 3.797383000  | 3.930801000  | 0.070672000  |
| 1  | 4.472721000  | 3.869477000  | 0.930837000  |
| 1  | 4.425748000  | 3.843346000  | -0.822313000 |
| 6  | 3.081865000  | 5.275469000  | 0.070308000  |
| 1  | 2.446369000  | 5.350877000  | 0.962972000  |
| 1  | 2.405118000  | 5.328180000  | -0.793205000 |
| 6  | 4.038804000  | 6.460120000  | 0.032551000  |
| 1  | 4.714421000  | 6.407584000  | 0.896827000  |
| 1  | 4.676544000  | 6.382346000  | -0.858194000 |
| 6  | 3.330061000  | 7.808838000  | 0.028273000  |
| 1  | 2.654736000  | 7.860432000  | -0.836770000 |
| 1  | 2.690795000  | 7.885140000  | 0.918525000  |
| 6  | 4.283969000  | 8.996090000  | -0.008079000 |
| 1  | 4.924344000  | 8.920130000  | -0.897628000 |
| 1  | 4.959241000  | 8.945885000  | 0.857154000  |
| 6  | 3.576883000  | 10.346028000 | -0.013876000 |
| 1  | 2.902491000  | 10.395327000 | -0.878478000 |
| 1  | 2.937328000  | 10.421169000 | 0.874994000  |
| 6  | 4.539241000  | 11.525326000 | -0.050405000 |
| 1  | 5.203908000  | 11.518800000 | 0.820042000  |
| 1  | 4.005689000  | 12.480410000 | -0.053773000 |
| 1  | 5.168634000  | 11.492871000 | -0.946125000 |
| 7  | 4.902327000  | -2.749723000 | 0.111378000  |
| 7  | 4.920316000  | -0.133616000 | 0.122792000  |
| 7  | 4.765541000  | 1.206598000  | 0.135078000  |
| 7  | 2.789618000  | 0.244694000  | 0.089875000  |
| 17 | 6.192225000  | -1.407755000 | -2.435915000 |
| 6  | 7.975250000  | -0.027351000 | -0.127425000 |
| 6  | 8.032089000  | -2.716595000 | -0.163624000 |
| 6  | 6.907436000  | -1.415551000 | 1.911937000  |
| 8  | 8.753366000  | 0.815065000  | -0.224945000 |
| 8  | 8.853804000  | -3.515068000 | -0.284513000 |
| 75 | 6.655154000  | -1.400061000 | 0.033000000  |
| 1  | -2.187769000 | -2.843007000 | -1.015783000 |
| 1  | -4.478040000 | -3.871012000 | -0.924927000 |
| 1  | -4.421111000 | -3.841568000 | 0.827873000  |
| 6  | 1.366918000  | 0.108017000  | 0.044244000  |
| 6  | 0.734657000  | 0.021421000  | -1.190648000 |
| 6  | 0.647770000  | 0.091206000  | 1.233389000  |
| 6  | -0.647645000 | -0.091925000 | -1.237180000 |
| 6  | -0.734530000 | -0.022113000 | 1.186856000  |
| 6  | -1.366794000 | -0.108682000 | -0.048046000 |
| 1  | 1.318600000  | 0.040047000  | -2.103605000 |
| 1  | 1.164070000  | 0.160578000  | 2.183883000  |
| 1  | -1.318475000 | -0.040710000 | 2.099814000  |
| 1  | -1.163950000 | -0.161265000 | -2.187672000 |
| 8  | 7.069766000  | -1.428193000 | 3.056589000  |

**Table S37.** Cartesian coordinates of complex **Bi-Re-paraPhe** in  $S_1$  (in dichloromethane).

|    |              |               |              |    |              |              |              |
|----|--------------|---------------|--------------|----|--------------|--------------|--------------|
| 6  | -6.884471000 | 1.378457000   | -2.079107000 | 1  | 1.544145000  | -2.488599000 | -0.022714000 |
| 6  | -7.966842000 | 0.040143000   | -0.014493000 | 6  | 3.678831000  | -2.154832000 | -0.113502000 |
| 6  | -8.015872000 | 2.729567000   | -0.039970000 | 6  | 3.743142000  | -0.750433000 | -0.037959000 |
| 6  | -4.958463000 | 4.080726000   | -0.343208000 | 6  | 3.500484000  | 1.436720000  | 0.100454000  |
| 1  | -5.953804000 | 4.505906000   | -0.367445000 | 6  | 2.834215000  | 2.762182000  | 0.179029000  |
| 6  | -3.835727000 | 4.894349000   | -0.358793000 | 1  | 2.235977000  | 2.802766000  | 1.098498000  |
| 1  | -3.956381000 | 5.969731000   | -0.395497000 | 1  | 2.114827000  | 2.838268000  | -0.646590000 |
| 6  | -2.582290000 | 4.303593000   | -0.326605000 | 6  | 3.803645000  | 3.935944000  | 0.137522000  |
| 1  | -1.682529000 | 4.907880000   | -0.337798000 | 1  | 4.514223000  | 3.850173000  | 0.966820000  |
| 6  | -2.490666000 | 2.919788000   | -0.281078000 | 1  | 4.396501000  | 3.884566000  | -0.782351000 |
| 1  | -1.525653000 | 2.432414000   | -0.257670000 | 6  | 3.082032000  | 5.275301000  | 0.212894000  |
| 6  | -3.659210000 | 2.170427000   | -0.266534000 | 1  | 2.482966000  | 5.316102000  | 1.132654000  |
| 6  | -3.733400000 | 0.719475000   | -0.233039000 | 1  | 2.369920000  | 5.352933000  | -0.619872000 |
| 6  | -3.469790000 | -1.440330000  | -0.201176000 | 6  | 4.029388000  | 6.467711000  | 0.176607000  |
| 6  | -2.813080000 | -2.771860000  | -0.169827000 | 1  | 4.739368000  | 6.391748000  | 1.011183000  |
| 1  | -2.095416000 | -2.786062000  | 0.659510000  | 1  | 4.631725000  | 6.423802000  | -0.740810000 |
| 6  | -3.795515000 | -3.928513000  | -0.036304000 | 6  | 3.313718000  | 7.811056000  | 0.244786000  |
| 6  | -3.085748000 | -5.275817000  | -0.004005000 | 1  | 2.603811000  | 7.885968000  | -0.590364000 |
| 1  | -2.373758000 | -5.293149000  | 0.832119000  | 1  | 2.710251000  | 7.854047000  | 1.161856000  |
| 1  | -2.488296000 | -5.395740000  | -0.917759000 | 6  | 4.258536000  | 9.005587000  | 0.209012000  |
| 6  | -4.045700000 | -6.451271000  | 0.128022000  | 1  | 4.862867000  | 8.963064000  | -0.707609000 |
| 1  | -4.646040000 | -6.327726000  | 1.039397000  | 1  | 4.968556000  | 8.932070000  | 1.044275000  |
| 1  | -4.756002000 | -6.434571000  | -0.709500000 | 6  | 3.544248000  | 10.350085000 | 0.275829000  |
| 6  | -3.344257000 | -7.803226000  | 0.166942000  | 1  | 2.834967000  | 10.422600000 | -0.558699000 |
| 1  | -2.742951000 | -7.926129000  | -0.744265000 | 1  | 2.940935000  | 10.391979000 | 1.191803000  |
| 1  | -2.633836000 | -7.818726000  | 1.004815000  | 6  | 4.497601000  | 11.536667000 | 0.238836000  |
| 6  | -4.302298000 | -8.980329000  | 0.299188000  | 1  | 5.197159000  | 11.506656000 | 1.081002000  |
| 1  | -5.012184000 | -8.966622000  | -0.539291000 | 1  | 3.958946000  | 12.487610000 | 0.288214000  |
| 1  | -4.905276000 | -8.856976000  | 1.209349000  | 1  | 5.090197000  | 11.537638000 | -0.682227000 |
| 6  | -3.603177000 | -10.333746000 | 0.341442000  | 7  | 4.945095000  | -2.747881000 | -0.201746000 |
| 1  | -3.000845000 | -10.456307000 | -0.567913000 | 7  | 4.940302000  | -0.134122000 | -0.020619000 |
| 1  | -2.894346000 | -10.346607000 | 1.179382000  | 7  | 4.780082000  | 1.212964000  | 0.069526000  |
| 6  | -4.569964000 | -11.502540000 | 0.473809000  | 7  | 2.797294000  | 0.242317000  | 0.033772000  |
| 1  | -5.162065000 | -11.422225000 | 1.391685000  | 17 | 6.418778000  | -1.296374000 | -2.550761000 |
| 1  | -4.042235000 | -12.460471000 | 0.501683000  | 6  | 8.008749000  | -0.025842000 | -0.150728000 |
| 1  | -5.269584000 | -11.532645000 | -0.368298000 | 6  | 8.112585000  | -2.650968000 | -0.299702000 |
| 17 | -6.192426000 | 1.468309000   | 2.271635000  | 6  | 6.651472000  | -1.576761000 | 1.786762000  |
| 7  | -4.885027000 | 2.747910000   | -0.298815000 | 8  | 8.823361000  | 0.775574000  | -0.138701000 |
| 7  | -4.910443000 | 0.132031000   | -0.251536000 | 8  | 9.002784000  | -3.364217000 | -0.369514000 |
| 7  | -4.758837000 | -1.208394000  | -0.233245000 | 75 | 6.621554000  | -1.391931000 | -0.158122000 |
| 7  | -2.780404000 | -0.250390000  | -0.200293000 | 1  | -2.216671000 | -2.887587000 | -1.083680000 |
| 8  | -7.041312000 | 1.365587000   | -3.224590000 | 1  | -4.504500000 | -3.902097000 | -0.870739000 |
| 8  | -8.748188000 | -0.797474000  | 0.098116000  | 1  | -4.387605000 | -3.798197000 | 0.876185000  |
| 8  | -8.836008000 | 3.532977000   | 0.057995000  | 6  | 1.381592000  | 0.112368000  | -0.025471000 |
| 75 | -6.641916000 | 1.405057000   | -0.199125000 | 6  | 0.760460000  | -0.051186000 | -1.259905000 |
| 6  | 5.009059000  | -4.090598000  | -0.289442000 | 6  | 0.639837000  | 0.163234000  | 1.149965000  |
| 1  | 6.005848000  | -4.511198000  | -0.359661000 | 6  | -0.620731000 | -0.167629000 | -1.320870000 |
| 6  | 3.908582000  | -4.909578000  | -0.296939000 | 6  | -0.742147000 | 0.047802000  | 1.092338000  |
| 1  | 4.038132000  | -5.981012000  | -0.376395000 | 6  | -1.357432000 | -0.113396000 | -0.143239000 |
| 6  | 2.620645000  | -4.319266000  | -0.195105000 | 1  | 1.356881000  | -0.086333000 | -2.164402000 |
| 1  | 1.730068000  | -4.937046000  | -0.186065000 | 1  | 1.142575000  | 0.282572000  | 2.102765000  |
| 6  | 2.516204000  | -2.958002000  | -0.105164000 | 1  | -1.338818000 | 0.081181000  | 1.996790000  |
|    |              |               |              | 1  | -1.123860000 | -0.290428000 | -2.273140000 |
|    |              |               |              | 8  | 6.664208000  | -1.696826000 | 2.920447000  |

**Table S38.** Cartesian coordinates of complex **Bi-Re-*para*Phe** in T<sub>1</sub> (in dichloromethane).

|    |              |               |              |    |              |              |              |
|----|--------------|---------------|--------------|----|--------------|--------------|--------------|
| 6  | 6.768816000  | 1.222682000   | 2.236369000  | 1  | -1.557153000 | -2.609338000 | -0.162684000 |
| 6  | 7.958805000  | 0.160895000   | 0.072971000  | 6  | -3.673448000 | -2.225655000 | 0.115713000  |
| 6  | 7.940460000  | 2.828446000   | 0.416763000  | 6  | -3.734241000 | -0.841219000 | -0.058860000 |
| 6  | 4.839312000  | 4.072254000   | 0.755051000  | 6  | -3.522751000 | 1.328997000  | -0.422722000 |
| 1  | 5.821926000  | 4.513592000   | 0.863760000  | 6  | -2.870625000 | 2.639227000  | -0.665755000 |
| 6  | 3.695990000  | 4.853769000   | 0.824843000  | 1  | -2.366969000 | 2.606144000  | -1.640526000 |
| 1  | 3.787698000  | 5.919815000   | 0.990743000  | 1  | -2.070795000 | 2.768586000  | 0.075134000  |
| 6  | 2.459887000  | 4.243870000   | 0.679441000  | 6  | -3.831323000 | 3.819991000  | -0.617253000 |
| 1  | 1.545072000  | 4.823117000   | 0.728822000  | 1  | -4.623193000 | 3.674683000  | -1.359868000 |
| 6  | 2.405418000  | 2.873355000   | 0.469399000  | 1  | -4.325659000 | 3.845783000  | 0.360001000  |
| 1  | 1.454557000  | 2.371310000   | 0.354589000  | 6  | -3.121252000 | 5.143075000  | -0.873059000 |
| 6  | 3.592811000  | 2.156583000   | 0.409756000  | 1  | -2.620419000 | 5.105961000  | -1.849835000 |
| 6  | 3.704881000  | 0.721672000   | 0.209540000  | 1  | -2.327118000 | 5.281122000  | -0.126791000 |
| 6  | 3.496715000  | -1.424270000  | -0.082991000 | 6  | -4.061002000 | 6.341401000  | -0.834986000 |
| 6  | 2.873730000  | -2.755643000  | -0.293065000 | 1  | -4.851965000 | 6.204990000  | -1.584704000 |
| 1  | 2.238993000  | -2.704483000  | -1.186463000 | 1  | -4.566984000 | 6.374188000  | 0.139316000  |
| 6  | 3.888007000  | -3.883739000  | -0.430930000 | 6  | -3.357060000 | 7.669950000  | -1.081465000 |
| 6  | 3.213151000  | -5.234313000  | -0.632100000 | 1  | -2.567679000 | 7.806538000  | -0.329640000 |
| 1  | 2.574717000  | -5.194394000  | -1.524886000 | 1  | -2.847931000 | 7.635321000  | -2.054382000 |
| 1  | 2.543722000  | -5.437284000  | 0.214645000  | 6  | -4.295168000 | 8.869825000  | -1.048146000 |
| 6  | 4.206675000  | -6.380332000  | -0.774218000 | 1  | -4.805620000 | 8.904754000  | -0.075812000 |
| 1  | 4.876146000  | -6.176282000  | -1.620625000 | 1  | -5.084371000 | 8.734572000  | -1.800511000 |
| 1  | 4.846043000  | -6.417726000  | 0.118025000  | 6  | -3.592659000 | 10.199809000 | -1.292965000 |
| 6  | 3.541398000  | -7.736362000  | -0.973903000 | 1  | -2.804536000 | 10.334240000 | -0.540929000 |
| 1  | 2.870722000  | -7.939108000  | -0.127687000 | 1  | -3.082777000 | 10.164049000 | -2.264291000 |
| 1  | 2.902244000  | -7.698595000  | -1.866655000 | 6  | -4.539214000 | 11.391873000 | -1.257832000 |
| 6  | 4.533435000  | -8.883970000  | -1.114527000 | 1  | -5.318203000 | 11.299306000 | -2.022115000 |
| 1  | 5.172966000  | -8.922317000  | -0.221941000 | 1  | -4.009155000 | 12.332176000 | -1.435991000 |
| 1  | 5.204807000  | -8.681792000  | -1.960434000 | 1  | -5.038309000 | 11.470405000 | -0.286096000 |
| 6  | 3.870922000  | -10.241677000 | -1.314494000 | 7  | -4.931723000 | -2.787323000 | 0.355197000  |
| 1  | 3.200354000  | -10.442909000 | -0.469150000 | 7  | -4.953514000 | -0.210855000 | -0.038344000 |
| 1  | 3.232267000  | -10.202610000 | -2.206309000 | 7  | -4.793867000 | 1.119697000  | -0.279118000 |
| 6  | 4.871515000  | -11.380852000 | -1.453684000 | 7  | -2.802980000 | 0.138932000  | -0.291222000 |
| 1  | 5.533556000  | -11.221333000 | -2.311458000 | 17 | -6.313831000 | -1.303016000 | 2.732252000  |
| 1  | 4.369556000  | -12.342490000 | -1.595773000 | 6  | -7.888207000 | 0.040244000  | 0.348593000  |
| 1  | 5.501587000  | -11.463211000 | -0.561636000 | 6  | -8.081967000 | -2.667598000 | 0.606999000  |
| 17 | 6.230684000  | 1.813778000   | -2.096705000 | 6  | -6.820686000 | -1.641909000 | -1.605908000 |
| 7  | 4.801729000  | 2.752517000   | 0.553350000  | 8  | -8.643498000 | 0.901355000  | 0.371595000  |
| 7  | 4.895065000  | 0.161248000   | 0.200764000  | 8  | -8.952005000 | -3.388116000 | 0.761343000  |
| 7  | 4.777865000  | -1.170794000  | 0.021307000  | 75 | -6.591113000 | -1.389969000 | 0.314017000  |
| 7  | 2.778019000  | -0.257419000  | 0.029962000  | 1  | 2.194805000  | -2.957835000 | 0.544829000  |
| 8  | 6.883488000  | 1.077134000   | 3.377654000  | 1  | 4.520785000  | -3.914736000 | 0.462649000  |
| 8  | 8.764348000  | -0.641467000  | -0.106270000 | 1  | 4.554697000  | -3.671776000 | -1.273889000 |
| 8  | 8.743818000  | 3.653966000   | 0.446772000  | 6  | -1.388777000 | 0.030390000  | -0.213650000 |
| 75 | 6.594535000  | 1.467124000   | 0.364541000  | 6  | -0.789775000 | -0.242759000 | 1.014057000  |
| 6  | -5.002970000 | -4.107821000  | 0.571142000  | 6  | -0.620780000 | 0.210387000  | -1.359966000 |
| 1  | -5.993302000 | -4.503246000  | 0.767269000  | 6  | 0.590896000  | -0.338110000 | 1.096105000  |
| 6  | -3.909896000 | -4.947379000  | 0.551752000  | 6  | 0.762141000  | 0.123632000  | -1.278486000 |
| 1  | -4.043032000 | -6.004775000  | 0.740446000  | 6  | 1.354024000  | -0.147193000 | -0.050873000 |
| 6  | -2.636051000 | -4.395890000  | 0.272146000  | 1  | -1.403267000 | -0.375824000 | 1.898005000  |
| 1  | -1.759677000 | -5.032638000  | 0.224993000  | 1  | -1.102095000 | 0.403811000  | -2.311556000 |
| 6  | -2.520516000 | -3.050686000  | 0.058108000  | 1  | 1.376993000  | 0.258955000  | -2.161076000 |
|    |              |               |              | 1  | 1.074735000  | -0.545092000 | 2.043886000  |
|    |              |               |              | 8  | -6.962370000 | -1.797242000 | -2.727885000 |
